# Supplementary material for: Barriers to healthcare and self-reported adverse outcomes for autistic adults: a cross-sectional study
Source: PubMed Central journal article supplement — BMJ Open. 2022 Feb 22;12(2):e056904. doi: 10.1136/bmjopen-2021-056904 (PMC8883251; doi:10.1136/bmjopen-2021-056904), 2022-02-22
Supplement: bmjopen-2021-056904.draft_revisions.pdf [file bmjopen-2021-056904.draft_revisions.pdf]

# BMJ Open

BMJ Open is committed to open peer review. As part of this commitment we make the peer review history of every article we publish publicly available.

When an article is published we post the peer reviewers' comments and the authors' responses online. We also post the versions of the paper that were used during peer review. These are the versions that the peer review comments apply to.

The versions of the paper that follow are the versions that were submitted during the peer review process. They are not the versions of record or the final published versions. They should not be cited or distributed as the published version of this manuscript.

BMJ Open is an open access journal and the full, final, typeset and author-corrected version of record of the manuscript is available on our site with no access controls, subscription charges or pay-per-view fees (<http://bmjopen.bmj.com>).

If you have any questions on BMJ Open's open peer review process please email [info.bmjopen@bmj.com](mailto:info.bmjopen@bmj.com)

# BMJ Open

## Barriers to healthcare for autistic adults: Consequences & policy implications. A cross-sectional study.

|                               |                                                                                                                                                                                                                                                                                                                                                                                              |
|-------------------------------|----------------------------------------------------------------------------------------------------------------------------------------------------------------------------------------------------------------------------------------------------------------------------------------------------------------------------------------------------------------------------------------------|
| Journal:                      | <i>BMJ Open</i>                                                                                                                                                                                                                                                                                                                                                                              |
| Manuscript ID                 | bmjopen-2021-056904                                                                                                                                                                                                                                                                                                                                                                          |
| Article Type:                 | Original research                                                                                                                                                                                                                                                                                                                                                                            |
| Date Submitted by the Author: | 29-Aug-2021                                                                                                                                                                                                                                                                                                                                                                                  |
| Complete List of Authors:     | Doherty, Mary; Our Lady's Hospital, Department of Anaesthesia<br>Neilson, Stuart; Independent Researcher<br>O'Sullivan, Jane; Mater Private Hospital, Anaesthetics<br>Carravallah, Laura; Michigan State University, Paediatrics and Human Development<br>Johnson, Mona; NHS Digital<br>Cullen, Walter; UCD, School of Medicine<br>Shaw, Sebastian C. K.; Brighton and Sussex Medical School |
| Keywords:                     | PRIMARY CARE, Adult psychiatry < PSYCHIATRY, Health policy < HEALTH SERVICES ADMINISTRATION & MANAGEMENT                                                                                                                                                                                                                                                                                     |
|                               |                                                                                                                                                                                                                                                                                                                                                                                              |

SCHOLARONE™  
Manuscripts

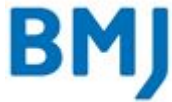

I, the Submitting Author has the right to grant and does grant on behalf of all authors of the Work (as defined in the below author licence), an exclusive licence and/or a non-exclusive licence for contributions from authors who are: i) UK Crown employees; ii) where BMJ has agreed a CC-BY licence shall apply, and/or iii) in accordance with the terms applicable for US Federal Government officers or employees acting as part of their official duties; on a worldwide, perpetual, irrevocable, royalty-free basis to BMJ Publishing Group Ltd ("BMJ") its licensees and where the relevant Journal is co-owned by BMJ to the co-owners of the Journal, to publish the Work in this journal and any other BMJ products and to exploit all rights, as set out in our [licence](#).

The Submitting Author accepts and understands that any supply made under these terms is made by BMJ to the Submitting Author unless you are acting as an employee on behalf of your employer or a postgraduate student of an affiliated institution which is paying any applicable article publishing charge ("APC") for Open Access articles. Where the Submitting Author wishes to make the Work available on an Open Access basis (and intends to pay the relevant APC), the terms of reuse of such Open Access shall be governed by a Creative Commons licence – details of these licences and which [Creative Commons](#) licence will apply to this Work are set out in our licence referred to above.

Other than as permitted in any relevant BMJ Author's Self Archiving Policies, I confirm this Work has not been accepted for publication elsewhere, is not being considered for publication elsewhere and does not duplicate material already published. I confirm all authors consent to publication of this Work and authorise the granting of this licence.

# Barriers to healthcare for autistic adults: Consequences & policy implications. A cross- sectional study.

## Barriers to healthcare for autistic adults

Mary Doherty<sup>1</sup>; Stuart Neilson<sup>2</sup>; Jane O'Sullivan<sup>3</sup>; Laura Carravallah<sup>4</sup>; Mona Johnson<sup>5</sup>; Walter Cullen<sup>6</sup>; Sebastian C. K. Shaw<sup>7</sup>

<sup>1</sup>Department of Anaesthesia, Our Lady's Hospital, Navan, Meath, Ireland; <sup>2</sup>Independent Researcher, Cork, Ireland; <sup>3</sup>Department of Anaesthesia, Mater Private Hospital, Dublin, Ireland; <sup>4</sup>Michigan State University, Paediatrics and Human Development, Medicine; <sup>5</sup>NHS Digital; <sup>6</sup>University College Dublin, College of Health Sciences, Department of Health Sciences; <sup>7</sup>Brighton and Sussex Medical School, Brighton, United Kingdom

### **Corresponding author:**

Dr Mary Doherty  
Department of Anaesthesia  
Our Lady's Hospital, Navan, Meath, Ireland  
[drmdoherty@gmail.com](mailto:drmdoherty@gmail.com)  
+353872209386

### **Keywords**

Adult autism, Healthcare barriers, Healthcare outcomes, Accommodations

|                     |      |
|---------------------|------|
| Abstract wordcount  | 243  |
| Main text wordcount | 2878 |

## Abstract

### Objectives:

Autistic people experience significantly poorer physical and mental health along with reduced life expectancy. Our aim was to identify self-reported barriers to primary care by autistic adults compared to non-autistic adults and to link these barriers to self-reported adverse health consequences.

### Methods:

Following consultation with the autistic community at an autistic conference, *Autscope*, we developed a self-report survey which we administered online through social media platforms.

### Results:

The 52-item online survey was completed by 507 autistic adults and 157 control subjects. Eighty percent of autistic adults and 37% of controls reported difficulty visiting a GP. The highest-rated barriers by autistic adults were deciding if symptoms warrant a GP visit (72%), difficulty making appointments by telephone (62%), not feeling understood (56%), difficulty communicating with their doctor (53%) and the waiting room environment (51%). Autistic adults reported a preference for online or text based appointment booking, facility to email in advance the reason for consultation, the first or last clinic appointment and a quiet place to wait. Increased adverse health outcomes reported by autistic adults correlated with difficulty attending, and these included untreated physical and mental health conditions, not attending specialist referral or screening programmes, requiring more extensive

1  
2  
3 treatment or surgery due to late presentations, and untreated potentially life threatening  
4  
5 conditions.  
6  
7  
8  
9

10 Conclusions:

11  
12 Reduction of healthcare inequalities for autistic people requires that healthcare providers  
13  
14 understand autistic perspectives, communication needs and sensory sensitivities.  
15  
16

17 Adjustments for autism specific needs are as necessary as ramps for wheelchair users.  
18  
19  
20  
21  
22  
23  
24  
25  
26  
27  
28  
29  
30  
31  
32  
33  
34  
35  
36  
37  
38  
39  
40  
41  
42  
43  
44  
45  
46  
47  
48  
49  
50  
51  
52  
53  
54  
55  
56  
57  
58  
59  
60

### Strengths and limitations of this study

Autistic people face barriers accessing the healthcare system, followed by difficulties interacting with healthcare providers, which may contribute to known healthcare disparities including increased morbidity and mortality.

Our study arose from a community-identified need to develop autism awareness training for healthcare providers and benefited from an autistic-led research team including autistic doctors, using participatory methods.

This cross sectional study compared the difficulties experienced by autistic and non-autistic adults when visiting a General Practitioner, but as we used a convenience sample and self-report survey, generalisability of the data may be limited.

We linked access barriers to self-reported adverse outcomes and our data indicated that autistic help-seeking may occur later in the natural course of an illness.

Common healthcare access barriers for autistic patients are described along with practical suggestions to promote access, which may help to reduce morbidity and excess mortality for autistic adults.

# Barriers to healthcare for autistic adults: Consequences & policy implications. A cross-sectional study.

## Introduction

Autism is a common neurodevelopmental condition affecting 1-2% of the population.<sup>1</sup> Most autistic people are adult, do not have intellectual disability and are likely to be undiagnosed.<sup>2</sup> Doctors may underestimate the number of autistic patients under their care.<sup>3,4</sup> Autistic adults have poor physical and mental health compared to the general population.<sup>5</sup> Most medical conditions are more prevalent in the autistic population,<sup>6,7</sup> including diabetes, hypertension and obesity.<sup>8</sup> Autistic people experience premature mortality.<sup>9,10,11</sup> Life expectancy is reduced by 16-30 years, with increased mortality across almost all diagnostic categories<sup>9</sup>. In-hospital mortality is also increased.<sup>12</sup> Autistic people are three times more likely to use emergency departments, to require inpatient admission, and to die after attending emergency care.<sup>13</sup>

Alongside increased health needs, autistic people report a greater likelihood that their needs are unmet.<sup>14</sup> Pervasive, multifactorial barriers to healthcare access are experienced.<sup>15</sup> Some are shared by other disabled people, but autistic patients experience additional autism-specific barriers.<sup>16</sup> Patient-provider communication, sensory sensitivities, executive functioning/planning difficulties, and prior negative experiences with healthcare providers are important barriers.<sup>17,18</sup>



1  
2  
3 In response to primary legislation<sup>19</sup> and statutory guidance<sup>20</sup> The Royal College of General  
4 Practitioners (RCGP) developed an Autism Patient Charter.<sup>21</sup> This recommended: staff  
5 awareness and training; autism friendly environment; reasonable adjustments following  
6 disclosure or clinical suspicion of autism; patient-tailored communications; and behaviour-  
7 sensitive accommodations.<sup>21</sup> Despite efforts to champion autism, proposals to formalise  
8 autism training<sup>18,22</sup> and specific awareness-raising interventions,<sup>21</sup> almost 40% of general  
9 practitioners (GPs) report no formal training in autism.<sup>22</sup> They also report limited confidence  
10 in managing autistic patients.<sup>22</sup> Greater autism awareness exists where GPs have personal  
11 knowledge of autism, either through a relative or friend on the autistic spectrum, or because  
12 they themselves are autistic.<sup>22</sup> Communication skills training for health care providers may be  
13 the most pressing need.<sup>4</sup> GPs<sup>22</sup> and hospital specialists<sup>3</sup> self-report difficulties communicating  
14 with autistic patients. Only 25% of primary healthcare providers reported high confidence in  
15 communicating with autistic adult patients, or identifying and making necessary  
16 accommodations.<sup>4</sup>

17  
18  
19  
20  
21  
22  
23  
24  
25  
26  
27  
28  
29  
30  
31  
32  
33  
34  
35  
36  
37  
38  
39  
40 This study aimed to identify self-reported barriers to primary health care faced by autistic  
41 adults with a focus on autism-specific communication, sensory issues and procedural  
42 considerations. We captured self-reported consequences to add a narrative frame to the  
43 existing evidence base around disparities in health outcomes. This is to our knowledge the  
44 largest study of primary healthcare barriers to date and benefits from a high degree of  
45 participatory design by the autistic community.  
46  
47  
48  
49  
50  
51  
52  
53  
54  
55  
56  
57  
58  
59  
60

## Methods

### *Conception and design*

Here, we present part of a larger cross-sectional study. This work was inspired by a quality improvement project designed to inform autism training for local healthcare providers as part of an “Autism Friendly Town” initiative by AsIAM, Ireland’s National Autism Charity.<sup>23,24</sup> In 2018, MD attended *Autescape*,<sup>25</sup> an annual conference by and for autistic people. Participants of all ages are welcome at *Autescape*, including those who are non-speaking, have high support needs or require full-time care, although the majority typically have low to moderate support needs. Whilst there, MD distributed a qualitative questionnaire entitled “What do you wish your GP knew about autism?” MD reviewed the 75 responses and grouped these under broad themes. That project formed the inspiration and basis for the study reported in this paper. Using the data gathered at *Autescape*, MD developed an online survey to investigate barriers to primary healthcare in a larger sample of autistic adults, compared with a non-autistic adult control group. Nine autistic adults assisted with refining the survey. The resulting survey contained a mix of quantitative questions and free comment boxes. Quantitative questions included yes-no responses, single- and multiple-item selections from a list, and Likert scales. We asked about specific barriers encountered accessing healthcare, reasons for delaying or avoiding a visit, and difficulties booking, planning or waiting for a GP visit. We explored the challenges during a consultation, including communication, sensory and organisation issues as well as available social supports. We also explored the impact of such barriers including self-reported consequences of failure to access healthcare and the reasonable adjustments to standard care which facilitate access. We used Google Forms to host the survey.

### *Piloting and refinement*

We piloted the survey in 2018. Preliminary analysis revealed a recurring theme of total non-engagement with healthcare providers, despite expressed healthcare needs. Consequently, we altered the survey to add response options applicable to non-attenders. Our research team, comprising autistic and non-autistic GPs, experienced academics, and other autistic individuals, adapted and refined the survey into its final 52-item form.

### *Sampling, recruitment and data collection*

Autistic adults were recruited using a convenience sampling approach, through Twitter, Facebook and the AsIAm website. We recruited non-autistic controls (without autistic children) through personal and professional contacts of research team members, local area groups and parenting groups on social media. Recruitment took place in August 2019. We provided participant information, with informed consent implied through subsequent completion of the questionnaire. We asked respondents, particularly those who were parents, to respond specifically about seeking healthcare for themselves. For those identifying as autistic, we asked if they were formally diagnosed or self-identified.

### *Data analysis*

We used the statistical package 'R' to assess significance of between-group associations using a test of proportions and a Wilcoxon-Mann-Whitney U test. Participants who skipped questions were omitted from the analyses of those questions. We intend to present our qualitative results elsewhere.

### *Patient and Public involvement*

Our study was conducted by an autistic-led research team including autistic doctors, using participatory methods. Nine autistic individuals assisted with developing and refining the survey into its final form.

## Results

### *Participants*

We are reporting 664 responses to the online survey: 507 autistic and 157 control (Table 1).

Unless otherwise specified, results relate to primary care.

| <u>Table 1. Participant Data</u>  |              |              |
|-----------------------------------|--------------|--------------|
|                                   | Autistic     | Control      |
| Participants (n)                  | 507          | 157          |
| <u>Age</u>                        |              |              |
| Median (Range)                    | 38 (17 - 73) | 38 (18 - 70) |
| <u>Gender</u>                     |              |              |
| Male                              | 99 (20%)     | 16 (10%)     |
| Female                            | 311 (62%)    | 132 (85%)    |
| Non-binary                        | 83 (17%)     | 7 (5%)       |
| Prefer not to say                 | 9 (2%)       | 1 (1%)       |
| <u>Location</u>                   |              |              |
| UK                                | 330 (65%)    | 67 (43%)     |
| Ireland                           | 77 (15%)     | 63 (40%)     |
| North America                     | 44 (9%)      | 20 (13%)     |
| Other                             | 56 (11%)     | 7 (4%)       |
| <u>Formal diagnosis of autism</u> |              |              |
| By psychiatrist                   | 25%          |              |
| By clinical psychologist          | 48%          |              |
| By multidisciplinary team         | 26%          |              |
| <u>Age at diagnosis</u>           |              |              |
| Median (Range)                    | 33 (2 - 67)  |              |

### *Barriers to access*

The most common reason for a GP visit was a physical condition or illness in both groups (86% vs 92%, n.s.). Autistic individuals were more likely to attend for mental health difficulties (61% vs 27%, difference 34%, 95%CI[25.2%,42.3%]  $p<0.001$ ). Twenty-two percent of the autistic respondents usually attended for issues directly related to autism. Compared to 37% of controls, 80% of autistic respondents reported difficulty visiting a GP when needed (difference 43% 95%CI[34.4%,51.9%],  $p<0.001$ ). While difficulty deciding if symptoms warrant a visit was a barrier for both groups (72% vs 65%, n.s.), the most notable difference related to difficulties using the telephone to book an appointment (62% vs 16%, difference 46%, 95%CI[38.5%,53.5%],  $p<0.001$ ). Not feeling understood was a reason to avoid or delay for 56% of autistic respondents compared to 13% of controls (difference 42%, 95%CI[35.2%,49.7%]  $p<0.001$ ). Difficulty communicating with the doctor during the appointment was a barrier for 53% of the autistic group but only 6% of controls (difference 46.7%, 95%CI[40.5, 52.9%],  $p<0.001$ ). See Supplementary Table 1 for specific barriers in order of frequency.

### *Communication*

Alongside difficulty using the telephone, not feeling understood and difficulty communicating with the doctor, autistic respondents reported difficulty communicating with reception staff more often than controls (46% vs 8%, difference 38%, 95%CI[31.5%,44.6%],  $p<0.001$ ). Fifty nine percent of autistic respondents reported difficulty communicating during a consultation “all the time” or “frequently” compared to 12% of controls ( $p<0.001$ ). Seventy eight percent of autistic adults reported that “anxiety makes it harder to communicate.”

Autistic respondents reported avoiding the telephone (78%), voicemail (61%) and face-to-face verbal communication (30%). Forty one percent reported that it is “easier for me to communicate in writing” (Table 2).

**Table 2 Communication Barriers**

| <b>Reasons to avoid or delay GP visit (Communication)</b>                          | Autistic<br>n (%) | Control<br>n (%) | Difference<br>(95% Confidence<br>Interval) | p value   |
|------------------------------------------------------------------------------------|-------------------|------------------|--------------------------------------------|-----------|
| Difficulty using the telephone to book an appointment                              | 314 (62%)         | 25 (16%)         | 46% (CI<br>38.5%,53.5%)                    | p<0.001** |
| Not feeling understood                                                             | 283 (56%)         | 21 (13%)         | 42% (CI<br>35.2%,49.7%)                    | p<0.001** |
| Difficulty communicating with the doctor during the appointment                    | 269 (53%)         | 10 (6%)          | 47% (CI<br>40.5%,52.9%)                    | p<0.001** |
| Difficulty communicating with the reception staff                                  | 235 (46%)         | 13 (8%)          | 38% (CI<br>31.5%,44.6%)                    | p<0.001** |
| <b>Communication preferences</b>                                                   |                   |                  |                                            |           |
| Telephone generally avoided where possible                                         | 395 (78%)         | 59 (38%)         | 40% (CI<br>31.5%,49.1%)                    | p<0.001** |
| Voicemail generally avoided where possible                                         | 311 (61%)         | 61 (39%)         | 23% (CI<br>13.3%,31.6%)                    | p<0.001** |
| Verbal, face-to-face communication generally avoided where possible                | 152 (30%)         | 12 (8%)          | 22% (CI<br>16.2%,28.5%)                    | p<0.001** |
| It is easier for me to communicate in writing                                      | 208 (41%)         | 13 (8%)          | 33% (CI<br>26.3%,39.2%)                    | p<0.001** |
| <b>Communication challenges</b>                                                    |                   |                  |                                            |           |
| Anxiety makes it harder to communicate                                             | 395 (78%)         | 42 (23%)         | 51% (CI<br>42.9%,59.4%)                    | p<0.001** |
| Sensory issues make communication more difficult                                   | 156 (31%)         | 2 (1%)           | 30% (CI<br>24.7%,34.3%)                    | p<0.001** |
| I need extra time to process what is being said                                    | 286 (56%)         | 12 (8%)          | 49% (CI<br>42.4%,55.2%)                    | p<0.001** |
| I can't describe my pain or symptoms accurately                                    | 272 (54%)         | 36 (23%)         | 31% (CI<br>22.4%,39.0%)                    | p<0.001** |
| Verbal communication is difficult                                                  | 234 (46%)         | 11 (7%)          | 39% (CI<br>32.8%,45.5%)                    | p<0.001** |
| I express emotions differently e.g. I can appear angry when I am afraid or in pain | 227 (45%)         | 6 (4%)           | 41% (CI<br>35.3%,46.6%)                    | p<0.001** |
| I have difficulty prioritising when describing medical symptoms                    | 333 (66%)         | 34 (22%)         | 44% (CI<br>36.0%,52.1%)                    | p<0.001** |
| I need to give the whole story and not leave anything out                          | 332 (66%)         | 18 (12%)         | 54% (CI<br>47.1%,60.9%)                    | p<0.001** |

|                                   |         |          |                         |           |
|-----------------------------------|---------|----------|-------------------------|-----------|
| None of the above (Communication) | 11 (2%) | 58 (37%) | -35% (CI -42.8%,-26.7%) | p<0.001** |
|-----------------------------------|---------|----------|-------------------------|-----------|

### *Sensory processing*

The waiting room environment was a barrier for 51% of autistic respondents, but only 8% of controls (difference 43%, 95%CI[36.4%,49.3%], p<0.001). Specific sensory barriers are detailed in Table 3. Sensory issues made communication more difficult for 31% of the autistic group (Table 2). Only 10% of autistic respondents marked “none of the above” to sensory questions compared to 71% of controls (difference 61%, 95%CI[-69.2%,-53.3%], p<0.001).

**Table 3: Sensory Barriers**

| <b><u>Reasons to avoid or delay GP visit (Sensory)</u></b> | <b>Autistic n (%)</b> | <b>Control n (%)</b> | <b>Difference (95% Confidence Interval)</b> | <b>p value</b> |
|------------------------------------------------------------|-----------------------|----------------------|---------------------------------------------|----------------|
| The waiting room environment                               | 256 (51%)             | 12 (8%)              | 42.8% (CI 36.4%,49.3%)                      | p<0.001 **     |
|                                                            |                       |                      |                                             |                |
| <b><u>Specific sensory challenges</u></b>                  | <b>Autistic n (%)</b> | <b>Control n (%)</b> | <b>Difference (95% Confidence Interval)</b> | <b>p value</b> |
| Noise in the waiting room from other patients              | 319 (63%)             | 19 (12%)             | 51% (CI 43.8%,57.8%)                        | p<0.001 **     |
| Crowded waiting area                                       | 299 (59%)             | 22 (14%)             | 45% (CI 37.6%,52.3%)                        | p<0.001 **     |
| Bright or fluorescent lights                               | 268 (53%)             | 14 (9%)              | 44% (CI 37.3%,50.6%)                        | p<0.001 **     |
| Uncomfortable furniture                                    | 195 (39%)             | 11 (7%)              | 32% (CI 25.2%,37.7%)                        | p<0.001 **     |
| Unexpected touch                                           | 193 (38%)             | 9 (6%)               | 32% (CI 26.3%,38.3%)                        | p<0.001 **     |
| Music playing in the waiting room                          | 172 (34%)             | 9 (6%)               | 28% (CI 22.3%,34.1%)                        | p<0.001 **     |
| Smells in the waiting room                                 | 171 (34%)             | 8 (5%)               | 29% (CI 22.9%,34.4%)                        | p<0.001 **     |
| Touch during examination                                   | 160 (32%)             | 11 (7%)              | 25% (CI 18.5%,30.7%)                        | p<0.001 **     |
| Noise from the reception desk                              | 140 (28%)             | 4 (3%)               | 25% (CI 20.0%,30.1%)                        | p<0.001 **     |
| Smells in the doctor’s office                              | 104 (21%)             | 6 (4%)               | 17% (CI 11.7%,21.7%)                        | p<0.001 **     |
| None of the above (Sensory)                                | 51 (10%)              | 112 (71%)            | -61% (CI -69.2%,-53.3%)                     | p<0.001 **     |

### *Perceived Stigma*

Only 3% of autistic respondents stated they did not feel anxious going to the doctor, compared to 33% of controls (difference 30%, 95%CI[-37.7%,-21.8%]  $p<0.001$ ). Autistic respondents reported being “concerned I won’t be taken seriously when I describe my symptoms” (67%); worried about “wasting the doctor’s time” (66%) and “being considered a hypochondriac” (65%). They also reported difficulty “asking for help” (63%) and “discussing mental health” (59%). Autistic respondents reported that unusual behaviour or stimming elicited negative reactions from other patients (15%) reception staff (9%) or medical staff (7%) (Supplementary Table 2).

### *Planning and Organising*

Autistic respondents reported difficulties with summarising when describing medical problems, with 66% noting the “need to give the whole story and not leave anything out” compared to 12% of controls (difference 54%, 95%CI[47.1%,60.9%],  $p<0.001$ ). Autistic respondents reported difficulties with organisation and planning for healthcare, including difficulties “making an appointment in advance” (59%), “prioritising my health issues” (58%) and “making changes to my lifestyle or habits” (56%). Forty five percent reported forgetting a medical appointment and 30% had attended on the wrong day. (Supplementary Table 3).

### *Predictability and control*

Autistic respondents reported more difficulty with uncertainty than controls. Particular difficulties included not knowing the wait duration (70% vs 30%, difference 40%, 95%CI[31.5%,48.7%],  $p<0.001$ ), what would happen during the consultation (63% vs 16%,



1  
2  
3 difference 47%, 95%CI[39.7%,54.7%],  $p<0.001$ ), which doctor they would see (58% vs 24%,  
4  
5 difference 33%, 95%CI[25.0%,41.8%],  $p<0.001$ ) and the consultation length (40% vs 8%,  
6  
7 difference 32%, 95%CI[25.6%,38.4%]  $p<0.001$ ).  
8  
9

### 10 11 12 13 *Support needs*

14  
15 Autistic adults reported physical mobility needs (16%), and unmet support needs in primary  
16  
17 care e.g. “needing a support person to come with me” (21%). This extended to secondary  
18  
19 care: 17% had no one to support unexpected hospital admission, collection from hospital  
20  
21 care: 17% had no one to support unexpected hospital admission, collection from hospital  
22  
23 (20%), or home care following discharge (26%). (Supplementary Table 4).  
24  
25

### 26 27 28 *Adverse consequences*

29  
30 Autistic respondents reported adverse consequences more frequently than controls,  
31  
32 including untreated mental (69%) and physical (63%) health conditions. Notably 60% were  
33  
34 told they “should have seen a doctor sooner” and 47% “did not attend referral to a specialist”.  
35  
36 Thirty-six percent “required more extensive treatment or surgery” and 34% did not access  
37  
38 treatment for a “potentially serious or life threatening condition”. Additionally, they were less  
39  
40 likely to “attend on schedule for screening programmes” than the control group (39% vs 21%,  
41  
42 difference 18%, 95%CI[9.8%,26.2%],  $p<0.001$ ) (Figure 1).  
43  
44  
45  
46  
47  
48  
49

50 Compared to autistic respondents who had no difficulty visiting a doctor, those who  
51  
52 experienced difficulty (80%) reported more untreated mental and physical health conditions  
53  
54 ( $p<0.001$ ). They were also more likely to not attend specialist referral ( $p<0.001$ ), to need  
55  
56 more extensive treatment ( $p=0.009$ ), to experience untreated life-threatening conditions  
57  
58 ( $p=0.006$ ) and to not attend screening ( $p=0.028$ ) (Figure 2). The autistic respondents who did  
59  
60

1  
2  
3 not attend any doctor at all (4%) differed from the controls (5%) in two areas: all had difficulty  
4  
5 visiting the doctor when needed, compared to 50% of controls ( $p=0.002$ ); and 95% of autistic  
6  
7 non-attenders had experienced at least one delayed treatment outcome, compared to 43%  
8  
9 of non-attending controls ( $p=0.01$ ). There were no significant differences in difficulty  
10  
11 attending, barriers experienced or adverse outcomes between formally diagnosed and self-  
12  
13 identified autistic respondents.  
14  
15  
16

### 17 18 19 20 *Facilitators*

21  
22 While most respondents (67% vs 65%) reported booking an appointment online would  
23  
24 facilitate access, autistic patients selected a need to “email my doctor in advance with a  
25  
26 description of the issue I need to discuss” (62%), “wait in a quiet place or outside until my  
27  
28 turn” (56%), and “book an appointment by text” (41%). Some autistic individuals would  
29  
30 benefit if they “could book the first or last appointment” (41%) or had a “sensory box available  
31  
32 in the waiting room” (16%) (Supplementary Table 5).  
33  
34  
35  
36  
37  
38  
39

40 Despite the outlined difficulties of visiting their doctor, autistic individuals felt their  
41  
42 relationship with their GP was “very important” or “important” significantly more than  
43  
44 controls (70% vs. 56%,  $p=0.001$ ), but only 33% of autistic respondents reported a good  
45  
46 relationship with their doctor ( $p<0.001$ ). Only 62% of autistic individuals reported that their  
47  
48 doctor knew they were autistic. Twenty two percent were unsure whereas 16% hadn’t  
49  
50 disclosed their diagnosis. Autistic respondents appreciated GPs who ask direct questions, give  
51  
52 clear explanations, are honest about not understanding autism but know that autism isn’t a  
53  
54 mental illness.  
55  
56  
57  
58  
59  
60

## Discussion

Our study describes the results of a survey of autistic adults and compares their experiences with non-autistic adults. It highlights barriers faced by autistic people accessing and engaging with primary healthcare. In our study these included greater difficulties deciding when to seek care, reluctance to bother their GP, difficulties planning appointments and greater communication difficulties – with particular emphasis on telephone use. Communication was also impaired by anxiety and sensory issues. We linked those barriers to self-reported adverse outcomes. Our data indicated that autistic help-seeking may occur later in the natural course of an illness. Autistic participants reported reduced attendance for screening, late presentations, missed opportunities for early detection and more extensive therapy being required. They also delayed or avoided healthcare because they didn't feel understood by their doctors. Furthermore, a substantial minority of autistic adults did not disclose their autism diagnosis which may impede identification of their autism-specific needs. These barriers may have real consequences, as evidenced in reduced life expectancy, and higher levels of physical and mental health conditions amongst autistic people.

### *Comparison with existing literature*

This study confirms the findings of Nicolaidis,<sup>14</sup> Raymaker<sup>16</sup> and several recent reviews<sup>15,17,26</sup>, which all identified three groups of barriers: (1) patient-level factors; (2) provider-level factors; and (3) system-level factors. Our study stratifies individual barriers from the perspective of autistic individuals. We couple these barriers to self-reported adverse consequences, highlighting factors which may lead to excess morbidity and mortality in the autistic population.

### *Strengths and limitations*

Our study arose from a community-identified need to develop autism awareness training for healthcare providers. It benefited from an autistic-led research team including autistic doctors, using participatory methods. This increased the likelihood of genuine responses being received. Our study provided a unique picture of autistic adults' healthcare experiences, including those entirely excluded from healthcare due to access barriers. In particular, we highlighted the difficulties with using the telephone which is a distilled, concentrated essence of verbal communication.

As we used a convenience sample and self-report survey, generalisability of the data may be limited. Respondents required the ability to complete the survey which excluded those with reduced ability to self-report. Whilst we did not set out to create a validated tool, our survey may have benefited from some validity and reliability testing. As the initial quality improvement questionnaire was undertaken in the United Kingdom, we did not include issues specific to other healthcare systems, such as cost or insurance. Our analyses did not account for potential confounding factors, such as ethnicity or socio-economic status. Female participants were over-represented in both groups which is not unusual for online surveys, but is interesting given the higher rate of autism diagnosis in males. Whilst we noted significant gender differences in relation to non-binary participants, these participants were almost all autistic and we were therefore unable to attribute differences to gender identity or autism with any degree of certainty. Furthermore, as this is a cross-sectional study, whilst we can identify associations, we cannot confirm causality.

### *Implications for Research*

Our study suggests a need for personalised healthcare access plans. A prior study investigated using a pre-visit telephone call to identify individualised accommodations.<sup>27</sup> Our data suggest that this could be problematic for autistic adults. The AASPIRE Healthcare Toolkit<sup>28</sup> includes a publicly available online program which generates a computerised report of required healthcare accommodations. Adaptation of such a toolkit in NHS General Practice should be considered and researched. Social care interventions and healthcare facilitators in general practice have shown benefit with a vulnerable population,<sup>29</sup> similar approaches could benefit an autistic population. The significant difficulties amongst the small number of autistic people not registered with any GP indicate a need for further research into this group.

### *Implications for Clinical Practice*

Figure 3 outlines our proposed elements of an autism friendly practice. Such adjustments may minimise anxiety, manage sensory issues, and ensure mutual understanding – promoting clear, unambiguous communication. Autism friendly practices should employ a personalised approach, with a healthcare access needs assessment and, where possible, a specialist liaison nurse or facilitator.

### *Implications for Policy*

Given the identified barriers, the extension of annual health checks to autistic adults<sup>30,31</sup> and the recently announced Oliver McGowan Mandatory Training in Learning Disability and Autism<sup>32</sup> are welcome. These will likely bring important benefits provided they are informed by the autistic community and autistic healthcare providers. Autism registers in GP practice

1  
2  
3 have been recommended.<sup>33,34</sup> The success of such initiatives will likely depend on greater  
4 awareness by medical practitioners of autistic culture and communication needs. Specific  
5 training for GPs during core training and continuing professional development may be  
6 beneficial. GPs with a special interest in autism should be facilitated to develop their skills,  
7 but management of general health needs and co-occurring conditions fall within the remit of  
8 every GP. Implementing existing autism legislation or development where lacking is required  
9 in order to reduce health inequities for autistic people.  
10  
11  
12  
13  
14  
15  
16  
17  
18  
19  
20  
21  
22

## 23 **Conclusions**

24  
25  
26 Autistic people face barriers accessing the healthcare system, followed by difficulties  
27 interacting with healthcare providers, which may contribute to known healthcare disparities  
28 including increased morbidity and mortality. Progress towards eliminating healthcare  
29 inequalities for autistic people may be achieved by understanding the healthcare experiences  
30 and access barriers for this vulnerable patient group. These barriers represent not so much a  
31 failure to deliver or to avail of healthcare, but a lack of intersection between the  
32 communication patterns of autistic healthcare users and non-autistic providers. This  
33 phenomenon is described by The Double Empathy Problem.<sup>35</sup> Reasonable accommodations  
34 are legally<sup>36</sup> and morally required. Adjustments for communication needs are as necessary  
35 for autistic people as ramps for wheelchair users.  
36  
37  
38  
39  
40  
41  
42  
43  
44  
45  
46  
47  
48  
49  
50  
51  
52

53 **Ethical approval:** We obtained ethical approval from SJH/TUH Research Ethics Committee,  
54 Tallaght University Hospital, Dublin.  
55  
56  
57  
58  
59  
60

1  
2  
3 **Competing interests:** None.  
4  
5

6  
7 **Data availability statement:** Data are available upon reasonable request. All data relevant to  
8 the study are included in the article or uploaded as supplementary information. Should  
9 further details or materials be required, please contact the corresponding author.  
10  
11

12  
13 **Acknowledgements:** We are indebted to Professor Louise Gallagher for her guidance during  
14 the early stages of this project. We acknowledge the input received from the autistic adult  
15 community recruited via local groups and online contacts during the development of the  
16 online survey. Assistance with content, structure and proofreading of the surveys was  
17 received from nine autistic adults in Ireland and the UK. We received assistance from  
18 members of peer support group 'Autistic Doctors International'. We also thank Dr David  
19 Hillebrandt, Dr Natalie Teasdale, Elaine McGoldrick and Karen Leneh Buckle for their  
20 assistance during this project. We are grateful to AsIAM, Ireland's National Autism Charity and  
21 Scally's SuperValu, Clonakilty, for the funding to enable open access publication.  
22  
23  
24  
25

#### 26 **Author Contributions**

27 Conception and design of study: M Doherty, S Neilson, J O'Sullivan, with contributions from  
28 those listed in acknowledgements.  
29

30 Acquisition of data: M Doherty, S Neilson, J O'Sullivan

31 Analysis of data: S Neilson, M Doherty, SCK Shaw

32 Interpretation of data: M Doherty, S Neilson, J O'Sullivan, L Carravallah, M Johnson, W Cullen,  
33 SCK Shaw  
34

35 Drafting and revising the manuscript: M Doherty, S Neilson, J O'Sullivan, L Carravallah, M  
36 Johnson, W Cullen, SCK Shaw

37 Approval of the version of the manuscript to be published: M Doherty, S Neilson, J O'Sullivan,  
38 L Carravallah, M Johnson, W Cullen, SCK Shaw  
39  
40  
41  
42  
43  
44  
45  
46  
47  
48  
49  
50  
51  
52  
53  
54  
55  
56  
57  
58  
59  
60

## References

1. Data CDC. Statistics. Autism Spectrum Disorder. Resource Document. Available at: <https://www.cdc.gov/ncbddd/autism/data.html> [Last accessed on 2021 Jul 24].
2. Royal College of Psychiatrists. The psychiatric management of autism in adults (CR228). Available at: <https://www.rcpsych.ac.uk/improving-care/campaigning-for-better-mental-health-policy/college-reports/2020-college-reports/cr228> [Last Accessed 2021 Jul 24]
3. Zerbo O, Massolo ML, Qian Y, Croen LA. A study of physician knowledge and experience with autism in adults in a large integrated healthcare system. *J Autism Dev Disord.* 2015;45(12):4002-14.
4. Nicolaidis C, Schnider G, Lee J, et al. Development and psychometric testing of the AASPIRE adult autism healthcare provider self-efficacy scale. *Autism.* Aug 2020. doi:10.1177/1362361320949734
5. Rydzewska E, Hughes-McCormack LA, Gillberg C, et al. General health of adults with autism spectrum disorders—A whole country population cross-sectional study. *Res Autism Spectr Disord.* 2019;60:59-66.
6. Croen LA, Zerbo O, Qian Y, et al. The health status of adults on the autism spectrum. *Autism.* 2015;19(7):814-23.
7. Ming X, Brimacombe M, Chaaban J, Zimmerman-Bier B, Wagner GC. Autism spectrum disorders: concurrent clinical disorders. *J Child Neurol.* 2008;23(1):6-13.
8. Flygare Wallen, E., Ljunggren, G., Carlsson, A.C., Pettersson, D. and Wändell, P., 2018. High prevalence of diabetes mellitus, hypertension and obesity among persons with a recorded diagnosis of intellectual disability or autism spectrum disorder. *J Intellect Disabil Res.* 62(4), pp.269-280.
9. Hirvikoski T, Mittendorfer-Rutz E, Boman M, Larsson H, Lichtenstein P, Bölte S. Premature mortality in autism spectrum disorder. *Br J Psychiatry.* 2016;208(3):232-8.
10. Hwang YI, Srasuebku P, Foley KR, Arnold S, Trollor JN. Mortality and cause of death of Australians on the autism spectrum. *Autism Res.* 2019;12(5):806-15.
11. Bilder D, Botts EL, Smith KR, et al. Excess mortality and causes of death in autism spectrum disorders: a follow up of the 1980s Utah/UCLA autism epidemiologic study. *J Autism Dev Disord.* 2013;43(5):1196-204
12. Akobirshoev I, Mitra M, Dembo R, Lauer E. In-hospital mortality among adults with autism spectrum disorder in the United States: A retrospective analysis of US hospital discharge data. *Autism.* 2020;24(1):177-89.
13. Vohra R, Madhavan S, Sambamoorthi U. Emergency department use among adults with autism spectrum disorders (ASD). *J Autism Dev Disord.* 2016;46(4):1441-54.
14. Nicolaidis C, Raymaker D, McDonald K, et al. Comparison of healthcare experiences in autistic and non-autistic adults: a cross-sectional online survey facilitated by an academic-community partnership. *J Gen Intern Med.* 2013;28(6):761-9.
15. Walsh C, Lydon S, O'Dowd E, O'Connor P. Barriers to Healthcare for Persons with Autism: A Systematic Review of the Literature and Development of A Taxonomy. *Dev Neurorehabil.* 2020 Feb 8:1-8.
16. Raymaker DM, McDonald KE, Ashkenazy E, et al. Barriers to healthcare: Instrument development and comparison between autistic adults and adults with and without other disabilities. *Autism.* 2017;21(8):972-84
17. Mason D, Ingham B, Urbanowicz A, et al. A systematic review of what barriers and facilitators prevent and enable physical healthcare services access for autistic adults. *J Autism Dev Disord.* 2019;49(8):3387-400.
18. Vogan V, Lake JK, Tint A, Weiss JA, Lunskey Y. Tracking health care service use and the experiences of adults with autism spectrum disorder without intellectual disability: A longitudinal study of service rates, barriers and satisfaction. *Disabil Health J.* 2017;10(2):264-270.
19. Autism Act UK. Hm Government (ed). 2009. Available at: <https://www.legislation.gov.uk/ukpga/2009/15/contents>. [Last accessed on 2021 Jul 24].
20. Department of Health, 2010. "Implementing fulfilling and rewarding lives". Statutory guidance for local authorities and NHS organisation to support implementation of the autism strategy. Department of Health, London



- 1
  - 2
  - 3
  - 4
  - 5
  - 6
  - 7
  - 8
  - 9
  - 10
  - 11
  - 12
  - 13
  - 14
  - 15
  - 16
  - 17
  - 18
  - 19
  - 20
  - 21
  - 22
  - 23
  - 24
  - 25
  - 26
  - 27
  - 28
  - 29
  - 30
  - 31
  - 32
  - 33
  - 34
  - 35
  - 36
  - 37
  - 38
  - 39
  - 40
  - 41
  - 42
  - 43
  - 44
  - 45
  - 46
  - 47
  - 48
  - 49
  - 50
  - 51
  - 52
  - 53
  - 54
  - 55
  - 56
  - 57
  - 58
  - 59
  - 60
21. Buckley C. Making your practice autism friendly. *InnovAiT*. 2017;10(6):327-31.
22. Unigwe S, Buckley C, Crane L, Kenny L, Remington A, Pellicano E. GPs' confidence in caring for their patients on the autism spectrum: an online self-report study. *Br J Gen Pract*. 2017;67(659):e445-52.
23. AsIAM, 2016. A first for Ireland with Clonakilty becoming Ireland's first autism friendly town. Available at <https://asiam.ie/clonakilty-autism-friendly-town/> [Last accessed on 2021 Jul 24].
24. AsIAM, 2020. Are you ready to make your Clonakilty commitment for Autism? Available at: <https://asiam.ie/asiam-public-sector-training/autism-friendly-communities/>. [Last accessed on 2021 Jul 24].
25. The Autscope Organisation. *Autscope 2018: Exploring Inclusion*. Tonbridge, Kent: 2018. Available from: <http://www.autscope.org/2018/> [Last accessed on 2021 Jul 24].
26. Bradshaw P, Pellicano E, van Driel M, Urbanowicz A. How can we support the healthcare needs of autistic adults without intellectual disability?. *Curr Dev Disord Rep*. 2019;6(2):45-56
27. Saqr Y, Braun E, Porter K, Barnette D, Hanks C. Addressing medical needs of adolescents and adults with autism spectrum disorders in a primary care setting. *Autism*. 2018;22(1):51-61.
28. Nicolaidis C, Raymaker D, McDonald K, et al. The development and evaluation of an online healthcare toolkit for autistic adults and their primary care providers. *J Gen Intern Med*. 2016;31(10):1180-9.
29. Abel J, Kingston H, Scally A, et al. Reducing emergency hospital admissions: a population health complex intervention of an enhanced model of primary care and compassionate communities. *Br J Gen Pract*. 2018;68(676):e803-10.
30. National Institute for Health and Care Excellence. Long term plan. [London]: 2019. Chapter 3, Learning Disability and Autism. Available at: <https://www.longtermplan.nhs.uk/online-version/chapter-3-further-progress-on-care-quality-and-outcomes/a-strong-start-in-life-for-children-and-young-people/learning-disability-and-autism/> [Last accessed on 2021 Jul 24].
31. Harper G, Smith E, Parr J, et al. Autistica action briefing: health checks. Available at: <https://www.autistica.org.uk/downloads/files/Autistica-Action-Briefing-Health-Checks.pdf>. [Last accessed on 2021 Jul 24].
32. Health Education England. Partners announced to deliver the Oliver McGowan Mandatory Learning Disability and Autism training for all health and social care staff. Health Education England, 2020, <https://www.hee.nhs.uk/news-blogs-events/news/partners-announced-deliver-oliver-mcgowan-mandatory-learning-disability-autism-training-all-health> [Last accessed on 2021 Jul 24].
33. National Institute for Health and Care Excellence. The practice establishes and maintains a register of all patients with a diagnosis of autism. [London]: 2017. ([NM153]). Available at: <https://www.nice.org.uk/standards-and-indicators/qofindicators/the-practice-establishes-and-maintains-a-register-of-all-patients-with-a-diagnosis-of-autism> [Last accessed on 2021 Jul 24].
34. Westminster Commission on Autism. A Spectrum of Obstacles An Inquiry into Access to Healthcare for Autistic People. Available at [https://westminsterautismcommission.files.wordpress.com/2016/03/ar1011\\_ncg-autism-report-july-2016.pdf](https://westminsterautismcommission.files.wordpress.com/2016/03/ar1011_ncg-autism-report-july-2016.pdf) [Last accessed on 2021 Jul 24].
35. Milton DE. On the ontological status of autism: the 'double empathy problem'. *Disabil Soc*. 2012;27(6):883-7.
36. Great Britain. Equality Act 2010. London: Stationary Office; 2010.

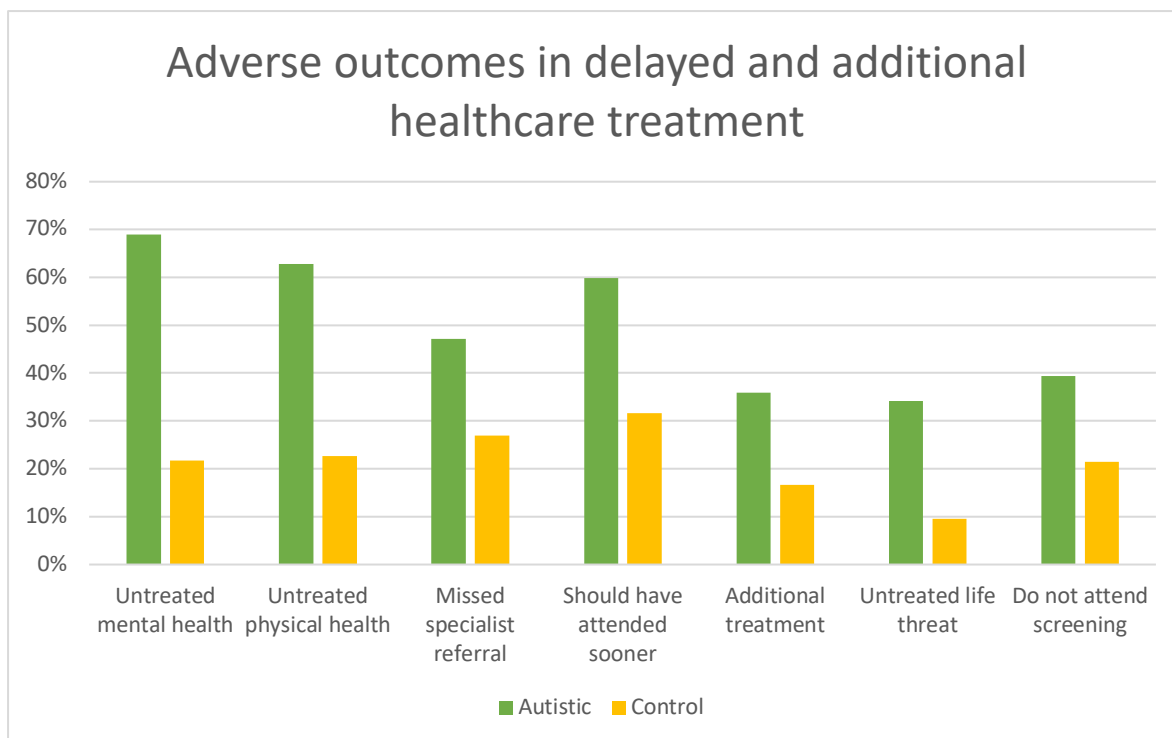

Figure 1. Adverse Healthcare Outcomes  
 For all comparisons between autistic and control groups  $p < 0.001$ .

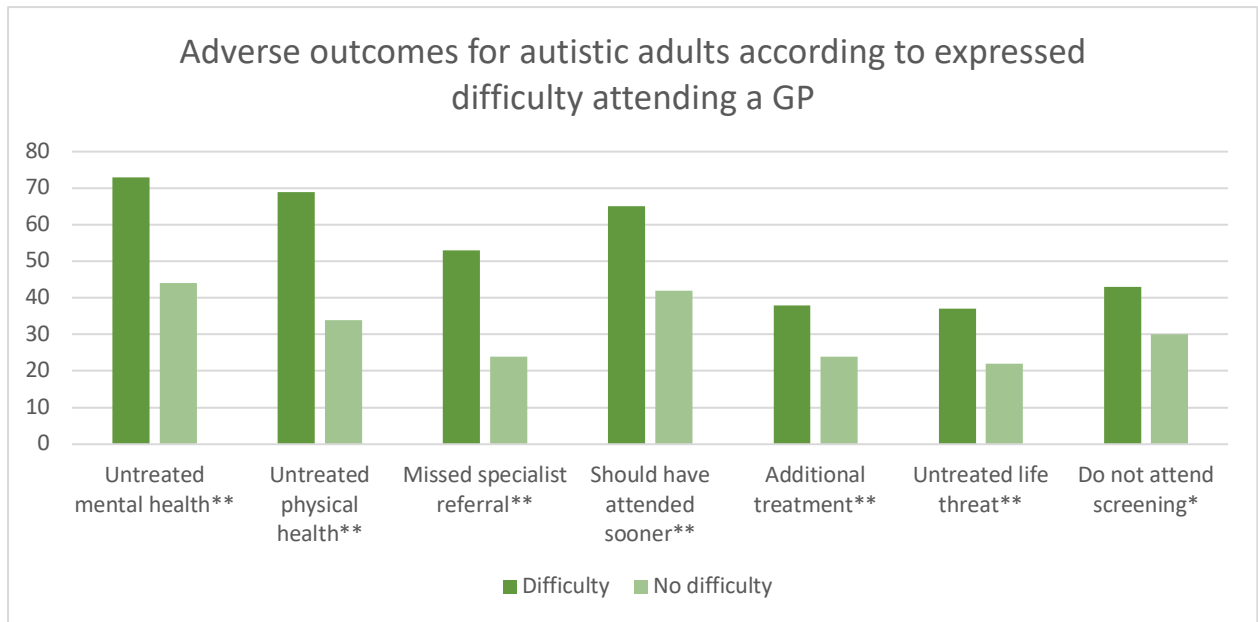

Figure 2. Adverse outcomes according to difficulty attending a GP

\*\*p<0.001

\* p<0.05

Note y-axis = N

Peer review only

1  
2  
3  
4  
5  
6  
7  
8  
9  
10  
11  
12  
13  
14  
15  
16  
17  
18  
19  
20  
21  
22  
23  
24  
25  
26  
27  
28  
29  
30  
31  
32  
33  
34  
35  
36  
37  
38  
39  
40  
41  
42  
43  
44  
45  
46  
47  
48  
49  
50  
51  
52  
53  
54  
55  
56  
57  
58  
59  
60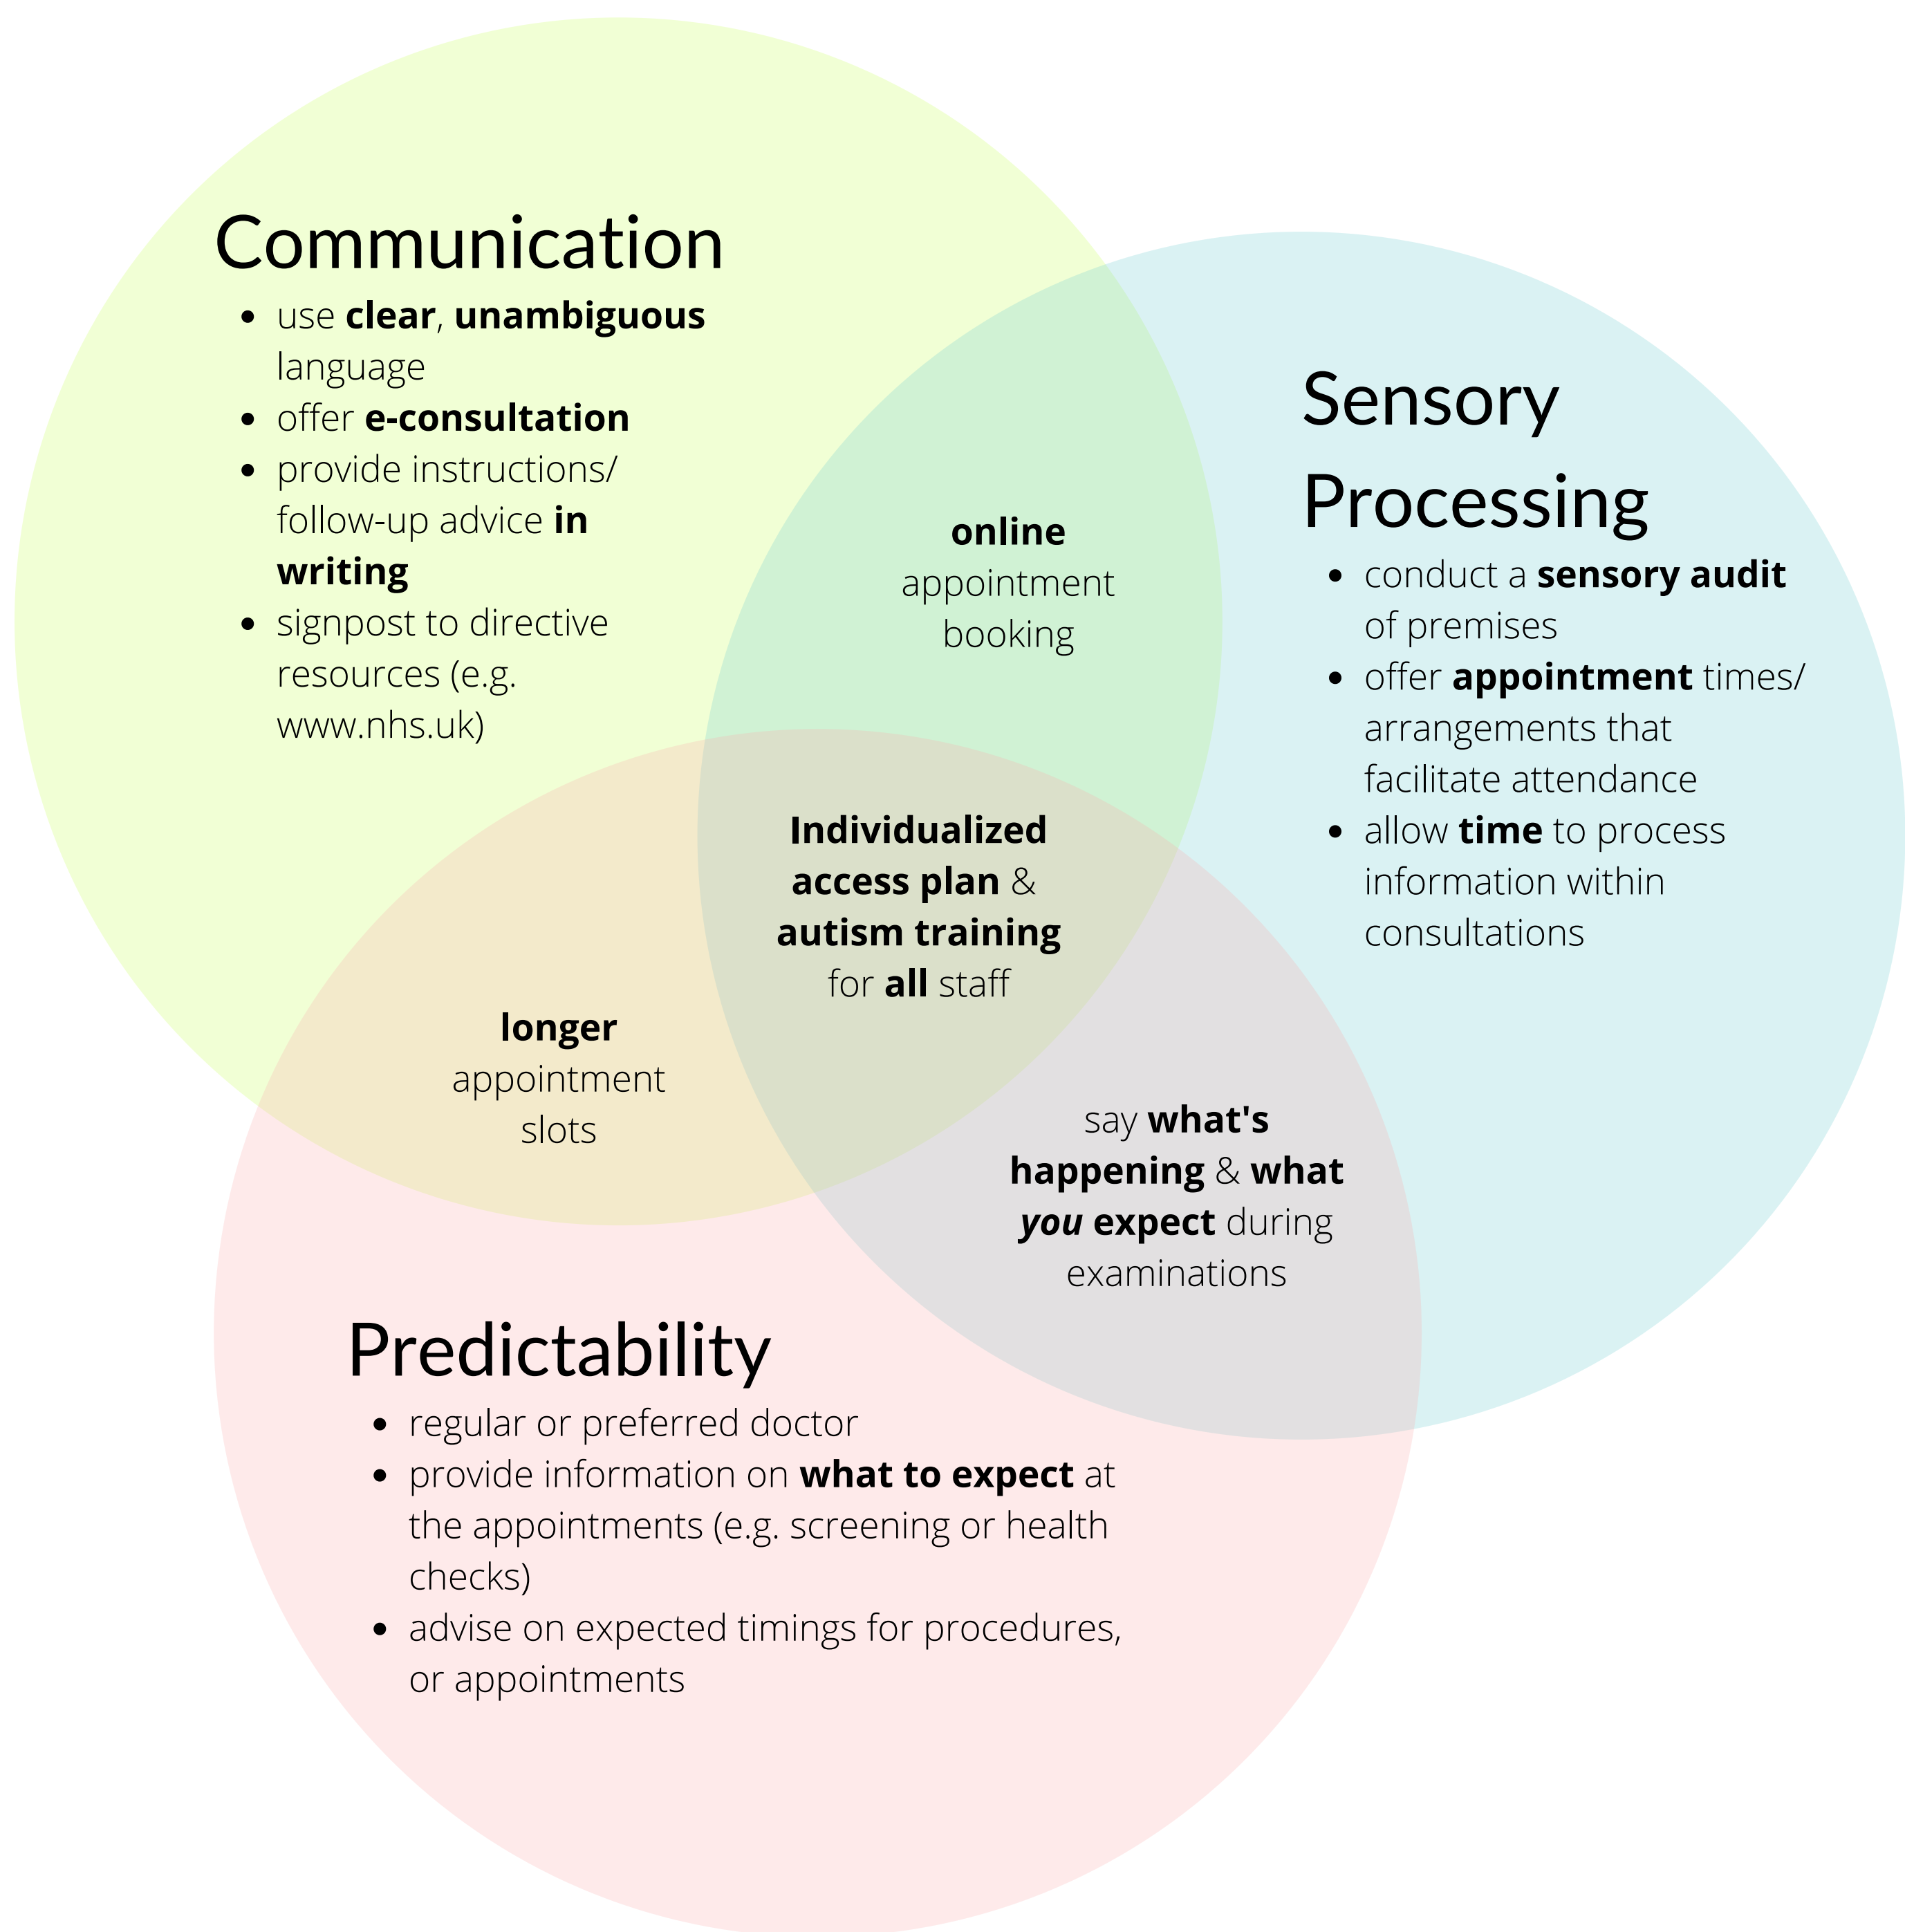

**Table S1 Access Barriers to Healthcare****Which of the following would cause you to delay or avoid seeing your doctor when you need to?**

|                                                                 | <b>Autistic<br/>n (%)</b> | <b>Control<br/>n (%)</b> | <b>Difference<br/>(95% Confidence Interval)</b> | <b>p value</b> |
|-----------------------------------------------------------------|---------------------------|--------------------------|-------------------------------------------------|----------------|
| Difficulty deciding if symptoms warrant a GP visit              | 366 (72%)                 | 102 (65%)                | 7% (CI -1.6%,16.1%)                             | p=0.102 ns     |
| Difficulty using the telephone to book appointment              | 314 (62%)                 | 25 (16%)                 | 46% (CI 38.5%,53.5%)                            | p<0.001**      |
| Not feeling understood                                          | 283 (56%)                 | 21 (13%)                 | 42% (CI 35.2%,49.7%)                            | p<0.001**      |
| Difficulty communicating with the doctor during the appointment | 269 (53%)                 | 10 (6%)                  | 47% (CI 40.5, 52.9%)                            | p<0.001**      |
| The waiting room environment                                    | 256 (51%)                 | 12 (8%)                  | 43% (CI 36.4%,49.3%)                            | p<0.001**      |
| Long wait to get an appointment                                 | 251 (50%)                 | 70 (45%)                 | 5% (CI -4.4%,14.2%)                             | p=0.324 ns     |
| Difficulty planning an appointment in advance                   | 243 (48%)                 | 51 (33%)                 | 15% (CI 6.5%,24.4%)                             | p<0.001**      |
| Inability to see a known or preferred doctor                    | 241 (48%)                 | 35 (23%)                 | 25% (CI 17.0%,33.5%)                            | p<0.001**      |
| Difficulty communicating with the reception staff               | 235 (46%)                 | 13 (8%)                  | 38% (CI 31.5%,44.6%)                            | p<0.001**      |
| Not having enough time to visit the doctor                      | 174 (34%)                 | 61 (39%)                 | -5% (CI -13.6%,4.6%)                            | p=0.346 ns     |
| No online booking system                                        | 160 (32%)                 | 35 (23%)                 | 9% (CI 1.2%,17.3%)                              | p=0.033*       |
| Waiting to see the doctor is too difficult                      | 114 (23%)                 | 7 (5%)                   | 18% (CI 12.7%,23.3%)                            | p<0.001**      |
| Needing a support person to come with me                        | 106 (21%)                 | 7 (5%)                   | 16% (CI 11.2%,21.7%)                            | p<0.001**      |
| There is an online booking system but it's confusing            | 102 (20%)                 | 9 (6%)                   | 14% (CI 8.9%,19.8%)                             | p<0.001**      |
| Not having anyone to look after my child                        | 66 (13%)                  | 18 (12%)                 | 2% (CI -4.6%,7.8%)                              | p=0.708 ns     |
| None of the above                                               | 6 (1%)                    | 17 (11%)                 | -10% (CI -15.0%,-4.3%)                          | p<0.001**      |

Table S2 Perceived Stigma

|                                                                                     | Autistic n (%) | Control n (5) | Difference<br>(95% Confidence Interval) | p value    |
|-------------------------------------------------------------------------------------|----------------|---------------|-----------------------------------------|------------|
| <b><u>Going to the doctor, I am anxious :</u></b>                                   |                |               |                                         |            |
| I won't be taken seriously when I describe my symptoms                              | 341 (67%)      | 54 (34%)      | 32.9% (CI 24.0%,41.8%)                  | p<0.001 ** |
| I might be wasting the doctor's time                                                | 333 (66%)      | 53 (34%)      | 31.9% (CI 23.0%,40.8%)                  | p<0.001 ** |
| I might be considered a hypochondriac                                               | 330 (65%)      | 42 (27%)      | 38.3% (CI 29.8%,46.8%)                  | p<0.001 ** |
| about asking for help                                                               | 318 (63%)      | 28 (18%)      | 44.9% (CI 37.2%,52.6%)                  | p<0.001 ** |
| about discussing mental health                                                      | 301 (59%)      | 37 (24%)      | 35.8% (CI 27.5%,44.1%)                  | p<0.001 ** |
| that there might be something wrong                                                 | 217 (43%)      | 55 (35%)      | 7.8% (CI -1.3%,16.8%)                   | p=0.102 ns |
| I don't feel anxious going to the doctor                                            | 17 (3%)        | 52 (33%)      | -30% (CI -37.7%,-21.8%)                 | p<0.001 ** |
| <b><u>Is stimming a problem for you at the doctors' office?</u></b>                 |                |               |                                         |            |
| Unusual behaviours or stimming elicit negative reactions from other patients        | 74 (14.6%)     | 4 (2.5%)      | 12% (CI 7.7%,16.4%)                     | p<0.001 ** |
| Unusual behaviours or stimming elicit negative reactions from other reception staff | 44 (8.7%)      | 1 (0.6%)      | 8% (CI 4.9%,11.2%)                      | p=0.001 ** |
| Unusual behaviours or stimming elicit negative reactions from other medical staff   | 37 (7.3%)      | 2 (1.3%)      | 6% (CI 2.7%,9.3%)                       | p=0.009 ** |
| I feel comfortable with stimming at the doctors' office                             | 101 (19.9%)    | 74 (47.1%)    | -27% (CI -36.2%,-18.2%)                 | p<0.001 ** |
| I do not feel comfortable with stimming at the doctors' office                      | 4 (0.8%)       | 5 (3.2%)      | -2% (CI -5.7%,0.9%)                     | p=0.061 ns |
| No need to stim at the doctors' office                                              | 133 (26.2%)    | 0 (0.0%)      | 26% (CI 22.0%,30.5%)                    | p<0.001 ** |
| I don't understand the term "stimming"                                              | 29 (5.7%)      | 62 (39.5%)    | -34% (CI -42.1%,-25.4%)                 | p<0.001 ** |

**Table S3 Planning and Organising**

|                                                                       | <b>Autistic<br/>n (%)</b> | <b>Control<br/>n (%)</b> | <b>Difference<br/>(Confidence Interval)</b> | <b>p value</b> |
|-----------------------------------------------------------------------|---------------------------|--------------------------|---------------------------------------------|----------------|
| I find it difficult to prioritise when describing my medical problems | 333 (66%)                 | 34 (22%)                 | 44% (CI 36.0%,52.1%)                        | p<0.001 **     |
| I need to give the whole story and not leave anything out             | 332 (66%)                 | 18 (12%)                 | 54% (CI 47.1%,60.9%)                        | p<0.001 **     |
| I find it difficult to make appointments in advance                   | 300 (59%)                 | 45 (29%)                 | 31% (CI 21.8%,39.2%)                        | p<0.001 **     |
| Making changes to my lifestyle or habits is difficult for me          | 282 (56%)                 | 36 (23%)                 | 33% (CI 24.4%,41.0%)                        | p<0.001 **     |
| I have forgotten to attend a medical appointment                      | 230 (45%)                 | 34 (22%)                 | 24% (CI 15.5%,31.9%)                        | p<0.001 **     |
| I need to write things down                                           | 227 (45%)                 | 17 (11%)                 | 34% (CI 27.0%,40.9%)                        | p<0.001 **     |
| I find waiting difficult                                              | 221 (44%)                 | 15 (10%)                 | 34% (CI 27.3%,40.8%)                        | p<0.001 **     |
| I have difficulty making decisions about my health                    | 222 (44%)                 | 20 (13%)                 | 31% (CI 23.9%,38.2%)                        | p<0.001 **     |
| I have turned up for a medical appointment on the wrong day           | 151 (30%)                 | 16 (10%)                 | 20% (CI 13.0%,26.2%)                        | p<0.001 **     |
| It is difficult to arrange someone to come with me                    | 103 (20%)                 | 2 (1%)                   | 19% (CI 14.7%,23.4%)                        | p<0.001 **     |
| I have forgotten why I made the appointment                           | 54 (11%)                  | 1 (1%)                   | 10% (CI 6.6%,13.4%)                         | p<0.001 **     |
| None of the above                                                     | 13 (3%)                   | 64 (41%)                 | -38% (CI -46.4%,-30.0%)                     | p<0.001 **     |

Table S4 Support Needs

| <b><u>Do you visit your doctor:</u></b>                                                                                             | Autistic n (%) | Control n (%) | Difference (95%CI)      | p value    |
|-------------------------------------------------------------------------------------------------------------------------------------|----------------|---------------|-------------------------|------------|
| Alone, by choice                                                                                                                    | 306 (60%)      | 134 (85%)     | -25% (CI -32.4%,-17.6%) | p<0.001 ** |
| Alone, but would prefer to have a support person                                                                                    | 165 (33%)      | 10 (6%)       | 26% (CI 20.2%,32.2%)    | p<0.001 ** |
| With a parent, partner or support person                                                                                            | 137 (27%)      | 9 (6%)        | 21% (CI 15.6%,27.0%)    | p<0.001 ** |
| With a parent, partner or support person but I would prefer to go alone                                                             | 12 (2%)        | 0 (0%)        | 2% (CI 0.6%,4.1%)       | p=0.109 ns |
| With a support animal                                                                                                               | 5 (1%)         | 0 (0%)        | 1% (CI -0.3%,2.3%)      | p=0.471 ns |
| To support an autistic adult                                                                                                        | 26 (5%)        | 0 (0%)        | 5% (CI 2.8%,7.5%)       | p=0.008 *  |
| As a parent to access healthcare for my child                                                                                       | 78 (15%)       | 30 (19%)      | -4% (CI -11.0%,3.6%)    | p=0.327 ns |
| With my child, but I would prefer to go alone                                                                                       | 6 (1%)         | 12 (8%)       | -7% (CI -11.1%,-1.8%)   | p<0.001 ** |
| <b><u>If you were suddenly admitted to hospital, who would be able to bring your personal belongings to you?</u></b>                |                |               |                         |            |
|                                                                                                                                     | Autistic n (%) | Control n (%) | Difference (95%CI)      | p value    |
| Spouse or partner                                                                                                                   | 234 (46%)      | 106 (68%)     | -21% (CI -30.3%,-12.4%) | p<0.001 ** |
| Parent                                                                                                                              | 168 (33%)      | 70 (45%)      | -11% (CI -20.7%,-2.2%)  | p=0.012 *  |
| Other family member                                                                                                                 | 96 (19%)       | 72 (46%)      | -27% (CI -35.8%,-18.0%) | p<0.001 ** |
| Friend                                                                                                                              | 118 (23%)      | 57 (36%)      | -13% (CI -21.8%,-4.2%)  | p=0.002 *  |
| Neighbour                                                                                                                           | 17 (3%)        | 14 (9%)       | -6% CI -10.7%,-0.4%)    | p=0.008 *  |
| Paid support person or carer                                                                                                        | 15 (3%)        | 1 (1%)        | 2% (CI -0.0%,4.7%)      | p=0.174 ns |
| Volunteer support person or carer                                                                                                   | 6 (1%)         | 0 (0%)        | 1% (CI -0.2%,2.5%)      | p=0.375 ns |
| Nobody available                                                                                                                    | 88 (17%)       | 5 (3%)        | 14% (CI 9.5%,18.9%)     | p<0.001 ** |
| <b><u>If you were admitted to hospital for a day case surgical procedure, who would be available to collect you afterwards?</u></b> |                |               |                         |            |
|                                                                                                                                     | Autistic n (%) | Control n (%) | Difference (95%CI)      | p value    |
| Spouse or partner                                                                                                                   | 208 (41%)      | 100 (64%)     | -23% (CI -31.7%,-13.6%) | p<0.001 ** |
| Parent                                                                                                                              | 176 (35%)      | 73 (47%)      | -12% (CI -21.0%,-2.5%)  | p=0.010 *  |
| Other family member                                                                                                                 | 96 (19%)       | 75 (48%)      | -29% (CI -37.8%,-19.9%) | p<0.001 ** |
| Friend                                                                                                                              | 116 (23%)      | 67 (43%)      | -29% (CI -37.8%,-19.9%) | p<0.001 ** |



|   |                                   |          |        |                      |            |
|---|-----------------------------------|----------|--------|----------------------|------------|
| 1 |                                   |          |        |                      |            |
| 2 |                                   |          |        |                      |            |
| 3 | Neighbour                         | 17 (3%)  | 8 (5%) | -2% (CI -5.9%,2.5%)  | p=0.446 ns |
| 4 | Paid support person or carer      | 17 (3%)  | 0 (0%) | 3% (CI 1.4%,5.3%)    | p=0.042 *  |
| 5 | Volunteer support person or carer | 3 (1%)   | 0 (0%) | 1% (CI -0.5%,1.7%)   | p=0.776 ns |
| 6 | Nobody available                  | 99 (20%) | 3 (2%) | 18% (CI 13.1%,22.1%) | p<0.001 ** |
| 7 |                                   |          |        |                      |            |
| 8 |                                   |          |        |                      |            |
| 9 |                                   |          |        |                      |            |

**If you needed assistance at home after an operation, who would be available to provide that care?**

|    |                                   |                |               |                         |            |
|----|-----------------------------------|----------------|---------------|-------------------------|------------|
| 10 |                                   |                |               |                         |            |
| 11 |                                   | Autistic n (%) | Control n (%) | Difference (95%CI)      | p value    |
| 12 | Spouse or partner                 | 219 (43%)      | 101 (64%)     | -21% (CI -30.2%,-12.1%) | p<0.001 ** |
| 13 | Parent                            | 152 (30%)      | 74 (47%)      | -17% (CI -26.3%,-8.0%*) | p<0.001 ** |
| 14 | Other family member               | 83 (16%)       | 61 (39%)      | -23% (CI -31.2%,-13.8%) | p<0.001 ** |
| 15 | Friend                            | 74 (15%)       | 43 (27%)      | -13% (CI -20.8%,-4.8%)  | p<0.001 ** |
| 16 | Neighbour                         | 14 (3%)        | 8 (5%)        | -2% (CI -6.5%,1.8%)     | p=0.241 ns |
| 17 | Paid support person or carer      | 30 (6%)        | 3 (2%)        | 4% (CI 0.6%,7.4%)       | p=0.071 ns |
| 18 | Volunteer support person or carer | 4 (1%)         | 0 (0%)        | 1% (CI -0.4%,2.0%)      | p=0.599 ns |
| 19 | Nobody available                  | 131 (26%)      | 13 (8%)       | 18% (CI 11.4%,23.7%)    | p<0.001 ** |
| 20 |                                   |                |               |                         |            |
| 21 |                                   |                |               |                         |            |
| 22 |                                   |                |               |                         |            |
| 23 |                                   |                |               |                         |            |

**If you are a parent and you were unable to care for your child due to illness, who would be available to provide that care to your child?**

|    |                                     |                |               |                         |            |
|----|-------------------------------------|----------------|---------------|-------------------------|------------|
| 24 |                                     |                |               |                         |            |
| 25 |                                     | Autistic n (%) | Control n (%) | Difference (95%CI)      | p value    |
| 26 | Spouse or partner                   | 110 (22%)      | 64 (41%)      | -19% (CI -28.0%,-10.2%) | p<0.001 ** |
| 27 | Parent                              | 37 (7%)        | 40 (26%)      | -18% (CI -25.8%,-10.6%) | p<0.001 ** |
| 28 | Other family member                 | 40 (8%)        | 40 (26%)      | -18% (CI -25.2%,-10.0%) | p<0.001 ** |
| 29 | Friend                              | 21 (4%)        | 27 (17%)      | -13% (CI -19.6%,-6.5%)  | p<0.001 ** |
| 30 | Neighbour                           | 4 (1%)         | 8 (5%)        | -5% (CI -8.2%,-0.4%)    | p<0.001 ** |
| 31 | Paid support person or carer        | 5 (1%)         | 9 (6%)        | -5% (CI -8.9%,-0.6%)    | p<0.001 ** |
| 32 | Volunteer support person or carer   | 1 (1%)         | 0 (0%)        | 0% (CI -0.4%,0.8%)      | p=1.000 ns |
| 33 | Nobody available                    | 34 (7%)        | 6 (4%)        | 3% (CI -1.2%,7.0%)      | p=0.256 ns |
| 34 | I don't have a child requiring care | 274 (54%)      | 78 (50%)      | 4% (CI -5.0%,13.7%)     | p=0.387 ns |
| 35 |                                     |                |               |                         |            |
| 36 |                                     |                |               |                         |            |
| 37 |                                     |                |               |                         |            |
| 38 |                                     |                |               |                         |            |
| 39 |                                     |                |               |                         |            |
| 40 |                                     |                |               |                         |            |
| 41 |                                     |                |               |                         |            |
| 42 |                                     |                |               |                         |            |
| 43 |                                     |                |               |                         |            |
| 44 |                                     |                |               |                         |            |
| 45 |                                     |                |               |                         |            |
| 46 |                                     |                |               |                         |            |

Table S5 Facilitators

|                                                                            |                       |                      | <b>Difference</b>                |                |
|----------------------------------------------------------------------------|-----------------------|----------------------|----------------------------------|----------------|
| <b>Visits to my doctor would be easier if:</b>                             | <b>Autistic n (%)</b> | <b>Control n (%)</b> | <b>(95% Confidence Interval)</b> | <b>p value</b> |
| I could book an appointment online                                         | 339 (67%)             | 102 (65%)            | 2% (CI -7.0%,10.8%)              | p=0.732 ns     |
| I could email in advance with a description of the issue I need to discuss | 316 (62%)             | 35 (22%)             | 40% (CI 31.9%,48.2%)             | p<0.001 **     |
| I could wait in a quiet place or outside until it was my turn              | 284 (56%)             | 13 (8%)              | 48% (CI 41.2%,54.3%)             | p<0.001 **     |
| I could book the first or last appointment of the day                      | 210 (41%)             | 38 (24%)             | 17% (CI 8.8%,25.6%)              | p<0.001 **     |
| I could book an appointment by text                                        | 209 (41%)             | 44 (28%)             | 13% (CI 4.6%,21.8%)              | p=0.004 **     |
| There was a sensory box available in the waiting room                      | 80 (16%)              | 4 (3%)               | 13% (CI 8.8%,17.7%)              | p<0.001 **     |
| None of the above                                                          | 16 (3%)               | 34 (22%)             | -19% (CI -25.5%,-11.5%)          | p<0.001 **     |

# BMJ Open

## Barriers to healthcare for autistic adults: Consequences & policy implications. A cross-sectional study.

|                                 |                                                                                                                                                                                                                                                                                                                                                                                        |
|---------------------------------|----------------------------------------------------------------------------------------------------------------------------------------------------------------------------------------------------------------------------------------------------------------------------------------------------------------------------------------------------------------------------------------|
| Journal:                        | <i>BMJ Open</i>                                                                                                                                                                                                                                                                                                                                                                        |
| Manuscript ID                   | bmjopen-2021-056904.R1                                                                                                                                                                                                                                                                                                                                                                 |
| Article Type:                   | Original research                                                                                                                                                                                                                                                                                                                                                                      |
| Date Submitted by the Author:   | 30-Oct-2021                                                                                                                                                                                                                                                                                                                                                                            |
| Complete List of Authors:       | Doherty, Mary; Our Lady's Hospital, Department of Anaesthesia<br>Neilson, Stuart; Independent Researcher<br>O'Sullivan, Jane; Mater Private Hospital, Anaesthetics<br>Carravallah, Laura; Michigan State University, Paediatrics and Human Development<br>Johnson, Mona; NHS Digital<br>Cullen, Walter; UCD, School of Medicine<br>Shaw, Sebastian; Brighton and Sussex Medical School |
| <b>Primary Subject Heading</b>: | General practice / Family practice                                                                                                                                                                                                                                                                                                                                                     |
| Secondary Subject Heading:      | Patient-centred medicine, Health policy                                                                                                                                                                                                                                                                                                                                                |
| Keywords:                       | PRIMARY CARE, Adult psychiatry < PSYCHIATRY, Health policy < HEALTH SERVICES ADMINISTRATION & MANAGEMENT                                                                                                                                                                                                                                                                               |
|                                 |                                                                                                                                                                                                                                                                                                                                                                                        |

SCHOLARONE™  
Manuscripts



I, the Submitting Author has the right to grant and does grant on behalf of all authors of the Work (as defined in the below author licence), an exclusive licence and/or a non-exclusive licence for contributions from authors who are: i) UK Crown employees; ii) where BMJ has agreed a CC-BY licence shall apply, and/or iii) in accordance with the terms applicable for US Federal Government officers or employees acting as part of their official duties; on a worldwide, perpetual, irrevocable, royalty-free basis to BMJ Publishing Group Ltd ("BMJ") its licensees and where the relevant Journal is co-owned by BMJ to the co-owners of the Journal, to publish the Work in this journal and any other BMJ products and to exploit all rights, as set out in our [licence](#).

The Submitting Author accepts and understands that any supply made under these terms is made by BMJ to the Submitting Author unless you are acting as an employee on behalf of your employer or a postgraduate student of an affiliated institution which is paying any applicable article publishing charge ("APC") for Open Access articles. Where the Submitting Author wishes to make the Work available on an Open Access basis (and intends to pay the relevant APC), the terms of reuse of such Open Access shall be governed by a Creative Commons licence – details of these licences and which [Creative Commons](#) licence will apply to this Work are set out in our licence referred to above.

Other than as permitted in any relevant BMJ Author's Self Archiving Policies, I confirm this Work has not been accepted for publication elsewhere, is not being considered for publication elsewhere and does not duplicate material already published. I confirm all authors consent to publication of this Work and authorise the granting of this licence.

# Barriers to healthcare for autistic adults: Consequences & policy implications. A cross-sectional study.

## Barriers to healthcare for autistic adults

Mary Doherty<sup>1</sup>; Stuart Neilson<sup>2</sup>; Jane O'Sullivan<sup>3</sup>; Laura Carravallah<sup>4</sup>; Mona Johnson<sup>5</sup>; Walter Cullen<sup>6</sup>; Sebastian C. K. Shaw<sup>7</sup>

<sup>1</sup>Department of Anaesthesia, Our Lady's Hospital, Navan, Meath, Ireland; <sup>2</sup>Independent Researcher, Cork, Ireland; <sup>3</sup>Department of Anaesthesia, Mater Private Hospital, Dublin, Ireland; <sup>4</sup>Michigan State University, Paediatrics and Human Development, Medicine; <sup>5</sup>NHS Digital; <sup>6</sup>University College Dublin, College of Health Sciences, Department of Health Sciences; <sup>7</sup>Brighton and Sussex Medical School, Brighton, United Kingdom

### **Corresponding author:**

Dr Mary Doherty  
Department of Anaesthesia  
Our Lady's Hospital, Navan, Meath, Ireland  
[drmdoherty@gmail.com](mailto:drmdoherty@gmail.com)  
+353872209386

### **Keywords**

Adult autism, Healthcare barriers, Healthcare outcomes, Accommodations

|                     |      |
|---------------------|------|
| Abstract wordcount  | 288  |
| Main text wordcount | 3404 |

## Abstract

### Objectives:

Autistic people experience poor physical and mental health along with reduced life expectancy compared to non-autistic people. Our aim was to identify self-reported barriers to primary care access by autistic adults compared to non-autistic adults and to link these barriers to self-reported adverse health consequences.

### Design:

Following consultation with the autistic community at an autistic conference, *Autscope*, we developed a self-report survey which we administered online through social media platforms.

### Setting:

The 52-item, international, online survey.

### Participants:

507 autistic adults and 157 non-autistic adults.

### Primary and secondary outcome measures:

Self-reported barriers to accessing healthcare and associated adverse health outcomes.

### Results:

Eighty percent of autistic adults and 37% of non-autistic respondents reported difficulty visiting a General Practitioner (GP). The highest-rated barriers by autistic adults were deciding if symptoms warrant a GP visit (72%), difficulty making appointments by telephone (62%), not feeling understood (56%), difficulty communicating with their doctor (53%) and the waiting room environment (51%). Autistic adults reported a preference for online or text based appointment booking, facility to email in advance the reason for consultation, the first or last clinic appointment and a quiet place to wait. Self-reported adverse health outcomes experienced by autistic adults were associated with barriers to accessing healthcare. Adverse outcomes included untreated physical and mental health conditions, not attending specialist referral or screening programmes, requiring more extensive treatment or surgery due to late presentations, and untreated potentially life threatening conditions. There were no significant differences in difficulty attending, barriers experienced or adverse outcomes between formally diagnosed and self-identified autistic respondents.

### Conclusions:

Reduction of healthcare inequalities for autistic people requires that healthcare providers understand autistic perspectives, communication needs and sensory sensitivities. Adjustments for autism specific needs are as necessary as ramps for wheelchair users.

### Strengths and limitations of this study

Our study arose from a community-identified need to develop autism awareness training for healthcare providers and benefited from an autistic-led research team including autistic medical doctors, using participatory methods.

To date, this large cross-sectional study is the first to explore the associations between barriers to accessing healthcare and self-reported adverse health outcomes for autistic adults.

As we used a convenience sample and self-report survey, generalisability of the data may be limited.

As the initial pilot questionnaire was undertaken in the United Kingdom, we did not include issues specific to other healthcare systems, such as cost or insurance, in this study.

# Barriers to healthcare for autistic adults: Consequences & policy implications. A cross-sectional study.

## Introduction

Autism is a common neurodevelopmental condition affecting 1-2% of the population.<sup>1</sup> While autism is lifelong and heterogeneous in presentation, most autistic people are adult, do not have intellectual disability and are likely to be undiagnosed.<sup>2</sup> Doctors may underestimate the number of autistic patients under their care.<sup>3,4</sup> Autistic adults have poor physical and mental health compared to the general population.<sup>5</sup> Most medical conditions are more prevalent in the autistic population,<sup>6,7</sup> including diabetes, hypertension and obesity.<sup>8</sup> Autistic people experience premature mortality.<sup>9,10,11</sup> Life expectancy is potentially reduced by 16-30 years, with increased mortality across almost all diagnostic categories<sup>9</sup>. In-hospital mortality is also increased.<sup>12</sup> Autistic people are three times more likely to use emergency departments, to require inpatient admission, and to die after attending emergency care.<sup>13</sup>

Alongside increased health needs, autistic people report a greater likelihood that these needs are unmet.<sup>14</sup> Pervasive, multifactorial barriers to healthcare access are experienced.<sup>15</sup> Some are shared by other disabled people, but autistic patients experience additional autism-specific barriers.<sup>16</sup> Patient-provider communication, sensory sensitivities, executive functioning/planning difficulties, and prior negative experiences with healthcare providers are important barriers.<sup>17,18</sup>



1  
2  
3  
4  
5  
6 In response to primary legislation<sup>19</sup> and statutory guidance,<sup>20</sup> the Royal College of General  
7  
8 Practitioners (RCGP) developed an Autism Patient Charter.<sup>21</sup> This recommended: staff  
9  
10 awareness and training; autism friendly environment; reasonable adjustments following  
11  
12 disclosure or clinical suspicion of autism; patient-tailored communications; and behaviour-  
13  
14 sensitive accommodations.<sup>21</sup> Despite efforts to champion autism, proposals to formalise  
15  
16 autism training,<sup>18,22</sup> and specific awareness-raising interventions,<sup>21</sup> almost 40% of general  
17  
18 practitioners (GPs) report no formal training in autism.<sup>22</sup> They also report limited confidence  
19  
20 in managing autistic patients.<sup>22</sup> Greater autism awareness exists where GPs have personal  
21  
22 knowledge of autism, either through a relative or friend on the autistic spectrum, or because  
23  
24 they themselves are autistic.<sup>22</sup> Communication skills training for health care providers may be  
25  
26 the most pressing need.<sup>4</sup> GPs<sup>22</sup> and hospital specialists<sup>3</sup> report difficulties communicating  
27  
28 with autistic patients. Only 25% of primary healthcare providers reported high confidence in  
29  
30 communicating with autistic adult patients, or identifying and making necessary  
31  
32 accommodations.<sup>4</sup>  
33  
34  
35  
36  
37  
38  
39  
40  
41

42 This study primarily aimed to identify self-reported barriers to accessing primary health care  
43  
44 faced by autistic adults with a focus on autism-specific communication, sensory issues and  
45  
46 procedural considerations. Secondary aims included capturing self-reported adverse health  
47  
48 outcomes and the associations between these and reported healthcare access barriers,  
49  
50 adding a narrative frame to the existing evidence base around health disparities. This is to our  
51  
52 knowledge the largest study of primary healthcare access barriers to date and benefits from  
53  
54 a high degree of participatory design by the autistic community.  
55  
56  
57  
58  
59  
60

## Methods

### *Ethical approval*

We obtained ethical approval from SJH/TUH Research Ethics Committee, Tallaght University Hospital, Dublin.

### *Conception and design*

Here, we present part of a larger cross-sectional study. This work was inspired by a quality improvement project designed to inform autism training for local healthcare providers as part of an “Autism Friendly Town” initiative by AsIAM, Ireland’s National Autism Charity.<sup>23,24</sup> In 2018, MD attended *Autescape*,<sup>25</sup> an annual conference by and for autistic people. Participants of all ages are welcome at *Autescape*, including those who are non-speaking, have high support needs or require full-time care, although the majority of attendees typically have low to moderate support needs. Whilst there, MD distributed a qualitative questionnaire entitled “What do you wish your GP knew about autism?” MD reviewed the 75 responses and grouped these under broad themes. That project formed the inspiration and basis for the study reported in this paper. Using the data gathered at *Autescape*, MD developed an online survey to investigate barriers to primary healthcare in a larger sample of autistic adults, compared with a non-autistic adult comparison group (see Supplement 1). Nine autistic adults assisted with refining the survey. The resulting survey contained a mix of quantitative questions and free comment boxes. Quantitative questions included yes-no responses, single- and multiple-item selections from a list, and Likert scales. We asked about specific barriers encountered accessing healthcare, reasons for delaying or avoiding a visit, and difficulties booking, planning or waiting for a GP visit. We explored the challenges during a consultation, including

1  
2  
3 communication, sensory and organisation issues as well as available social supports. We also  
4  
5 explored the impact of such barriers including self-reported consequences of failure to access  
6  
7 healthcare and the reasonable adjustments to standard care which facilitate access. We used  
8  
9 Google Forms to host the survey.  
10  
11  
12  
13  
14

### 15 *Piloting and refinement*

16  
17 We piloted the survey in 2018. Preliminary analysis revealed a recurring theme of total non-  
18  
19 engagement with healthcare providers, despite expressed healthcare needs. Consequently,  
20  
21 we altered the survey to add response options applicable to non-attenders. Our research  
22  
23 team, comprising autistic and non-autistic GPs, experienced academics, and other autistic  
24  
25 individuals, adapted and refined the survey into its final 52-item form.  
26  
27  
28  
29  
30  
31

### 32 *Sampling, recruitment and data collection*

33  
34 Autistic adults were recruited using a convenience sampling approach, through Twitter,  
35  
36 Facebook and the AsIAm website. We recruited non-autistic controls (without autistic  
37  
38 children) through personal and professional contacts of research team members, local area  
39  
40 groups and parenting groups on social media. Recruitment took place in August 2019. We  
41  
42 provided participant information, with informed consent implied through subsequent  
43  
44 completion of the questionnaire. We asked respondents, particularly those who were  
45  
46 parents, to respond specifically about seeking healthcare for themselves. For those  
47  
48 identifying as autistic, we asked if they were formally diagnosed or self-identified.  
49  
50  
51  
52  
53  
54  
55  
56

### 57 *Data analysis*

We used the statistical package 'R' to assess significance of between-group associations using a test of proportions and a Wilcoxon-Mann-Whitney U test. Participants who skipped questions were omitted from the analyses of those questions. We intend to present our qualitative results elsewhere.

### *Patient and Public involvement*

Our study was conducted by an autistic-led research team including autistic medical doctors, using participatory methods. In addition, nine autistic individuals assisted with developing and refining the survey into its final form.

## Results

### *Participants*

We are reporting 664 responses to the online survey: 507 autistic adults and 157 non-autistic adults (Table 1). Unless otherwise specified, results relate to primary care.

Table 1. Participant Data

|                   | Autistic     | Non-autistic |
|-------------------|--------------|--------------|
| Participants (n)  | 507          | 157          |
| <u>Age</u>        |              |              |
| Median (Range)    | 38 (17 - 73) | 38 (18 - 70) |
| <u>Gender</u>     |              |              |
| Male              | 99 (20%)     | 16 (10%)     |
| Female            | 311 (62%)    | 132 (85%)    |
| Non-binary        | 83 (17%)     | 7 (5%)       |
| Prefer not to say | 9 (2%)       | 1 (1%)       |

|                                   |             |          |
|-----------------------------------|-------------|----------|
|                                   |             |          |
| <u>Location</u>                   |             |          |
| UK                                | 330 (65%)   | 67 (43%) |
| Ireland                           | 77 (15%)    | 63 (40%) |
| North America                     | 44 (9%)     | 20 (13%) |
| Other                             | 56 (11%)    | 7 (4%)   |
|                                   |             |          |
| <u>Formal diagnosis of autism</u> | 77%         |          |
| By psychiatrist                   | 25%         |          |
| By clinical psychologist          | 48%         |          |
| By multidisciplinary team         | 26%         |          |
|                                   |             |          |
| <u>Age at diagnosis</u>           |             |          |
| Median (Range)                    | 33 (2 - 67) |          |

### *Barriers to access*

The most common reason for a GP visit was a physical condition or illness in both groups (86% vs 92%, n.s.). Autistic individuals were more likely to attend for mental health difficulties (61% vs 27%, difference 34%, 95%CI[25.2%,42.3%],  $p<0.001$ ). Twenty-two percent of the autistic respondents usually attended for issues directly related to autism. Compared to 37% of non-autistic respondents, 80% of autistic respondents reported difficulty visiting a GP when needed (difference 43%, 95%CI[34.4%,51.9%],  $p<0.001$ ). While difficulty deciding if symptoms warrant a visit was a barrier for both groups (72% vs 65%, n.s.), the most notable difference related to difficulties using the telephone to book an appointment (62% vs 16%). Not feeling understood was a reason to avoid or delay for 56% of autistic respondents compared to 13% of non-autistic respondents. Difficulty communicating with the doctor during the appointment was a barrier for 53% of the autistic group but only 6% of non-autistic respondents. See Supplementary Table 1 for specific barriers in order of frequency.

### *Communication*

1  
2  
3 Alongside difficulty using the telephone, not feeling understood and difficulty communicating  
4  
5 with the doctor, autistic respondents reported difficulty communicating with reception staff  
6  
7 more often than non-autistic respondents (46% vs 8%, difference 38%, 95%CI[31.5%,44.6%],  
8  
9  $p<0.001$ ). Fifty nine percent of autistic respondents reported difficulty communicating during  
10  
11 a consultation “all the time” or “frequently” compared to 12% of non-autistic respondents  
12  
13 ( $p<0.001$ ). Seventy eight percent of autistic adults reported that “anxiety makes it harder to  
14  
15 communicate.”  
16  
17  
18  
19  
20  
21  
22

23 Autistic respondents reported avoiding the telephone (78%), voicemail (61%) and face-to-  
24  
25 face verbal communication (30%). Forty one percent reported that it is “easier for me to  
26  
27 communicate in writing” (Table 2).  
28  
29  
30  
31  
32

33 **Table 2 Communication Barriers**

| <b>Reasons to avoid or delay GP visit (Communication)</b>           |                |                    |                                      |           |
|---------------------------------------------------------------------|----------------|--------------------|--------------------------------------|-----------|
|                                                                     | Autistic n (%) | Non-autistic n (%) | Difference (95% Confidence Interval) | p value   |
| Difficulty using the telephone to book an appointment               | 314 (62%)      | 25 (16%)           | 46% (CI 38.5%,53.5%)                 | $p<0.001$ |
| Not feeling understood                                              | 283 (56%)      | 21 (13%)           | 42% (CI 35.2%,49.7%)                 | $p<0.001$ |
| Difficulty communicating with the doctor during the appointment     | 269 (53%)      | 10 (6%)            | 47% (CI 40.5%,52.9%)                 | $p<0.001$ |
| Difficulty communicating with the reception staff                   | 235 (46%)      | 13 (8%)            | 38% (CI 31.5%,44.6%)                 | $p<0.001$ |
|                                                                     |                |                    |                                      |           |
| <b>Communication preferences</b>                                    |                |                    |                                      |           |
| Telephone generally avoided where possible                          | 395 (78%)      | 59 (38%)           | 40% (CI 31.5%,49.1%)                 | $p<0.001$ |
| Voicemail generally avoided where possible                          | 311 (61%)      | 61 (39%)           | 23% (CI 13.3%,31.6%)                 | $p<0.001$ |
| Verbal, face-to-face communication generally avoided where possible | 152 (30%)      | 12 (8%)            | 22% (CI 16.2%,28.5%)                 | $p<0.001$ |

|                                                                                    |           |          |                         |         |
|------------------------------------------------------------------------------------|-----------|----------|-------------------------|---------|
| It is easier for me to communicate in writing                                      | 208 (41%) | 13 (8%)  | 33% (CI 26.3%,39.2%)    | p<0.001 |
| <b><u>Communication challenges</u></b>                                             |           |          |                         |         |
| Anxiety makes it harder to communicate                                             | 395 (78%) | 42 (23%) | 51% (CI 42.9%,59.4%)    | p<0.001 |
| Sensory issues make communication more difficult                                   | 156 (31%) | 2 (1%)   | 30% (CI 24.7%,34.3%)    | p<0.001 |
| I need extra time to process what is being said                                    | 286 (56%) | 12 (8%)  | 49% (CI 42.4%,55.2%)    | p<0.001 |
| I can't describe my pain or symptoms accurately                                    | 272 (54%) | 36 (23%) | 31% (CI 22.4%,39.0%)    | p<0.001 |
| Verbal communication is difficult                                                  | 234 (46%) | 11 (7%)  | 39% (CI 32.8%,45.5%)    | p<0.001 |
| I express emotions differently e.g. I can appear angry when I am afraid or in pain | 227 (45%) | 6 (4%)   | 41% (CI 35.3%,46.6%)    | p<0.001 |
| I have difficulty prioritising when describing medical symptoms                    | 333 (66%) | 34 (22%) | 44% (CI 36.0%,52.1%)    | p<0.001 |
| I need to give the whole story and not leave anything out                          | 332 (66%) | 18 (12%) | 54% (CI 47.1%,60.9%)    | p<0.001 |
| None of the above (Communication)                                                  | 11 (2%)   | 58 (37%) | -35% (CI -42.8%,-26.7%) | p<0.001 |

### *Sensory processing*

The waiting room environment was a barrier for 51% of autistic respondents, but only 8% of non-autistic respondents. Specific sensory barriers are detailed in Table 3. Sensory issues made communication more difficult for 31% of the autistic group (See Table 2). Only 10% of autistic respondents marked “none of the above” to sensory questions compared to 71% of non-autistic respondents.

**Table 3: Sensory Barriers**

| <b><u>Reasons to avoid or delay GP visit (Sensory)</u></b> | <b>Autistic n (%)</b> | <b>Non-autistic n (%)</b> | <b>Difference (95% Confidence Interval)</b> | <b>p value</b> |
|------------------------------------------------------------|-----------------------|---------------------------|---------------------------------------------|----------------|
| The waiting room environment                               | 256 (51%)             | 12 (8%)                   | 42.8% (CI 36.4%,49.3%)                      | p<0.001        |

| <b><u>Specific sensory challenges</u></b>     | <b>Autistic n (%)</b> | <b>Non-autistic n (%)</b> | <b>Difference (95% Confidence Interval)</b> | <b>p value</b> |
|-----------------------------------------------|-----------------------|---------------------------|---------------------------------------------|----------------|
| Noise in the waiting room from other patients | 319 (63%)             | 19 (12%)                  | 51% (CI 43.8%,57.8%)                        | p<0.001        |
| Crowded waiting area                          | 299 (59%)             | 22 (14%)                  | 45% (CI 37.6%,52.3%)                        | p<0.001        |
| Bright or fluorescent lights                  | 268 (53%)             | 14 (9%)                   | 44% (CI 37.3%,50.6%)                        | p<0.001        |
| Uncomfortable furniture                       | 195 (39%)             | 11 (7%)                   | 32% (CI 25.2%,37.7%)                        | p<0.001        |
| Unexpected touch                              | 193 (38%)             | 9 (6%)                    | 32% (CI 26.3%,38.3%)                        | p<0.001        |
| Music playing in the waiting room             | 172 (34%)             | 9 (6%)                    | 28% (CI 22.3%,34.1%)                        | p<0.001        |
| Smells in the waiting room                    | 171 (34%)             | 8 (5%)                    | 29% (CI 22.9%,34.4%)                        | p<0.001        |
| Touch during examination                      | 160 (32%)             | 11 (7%)                   | 25% (CI 18.5%,30.7%)                        | p<0.001        |
| Noise from the reception desk                 | 140 (28%)             | 4 (3%)                    | 25% (CI 20.0%,30.1%)                        | p<0.001        |
| Smells in the doctor's office                 | 104 (21%)             | 6 (4%)                    | 17% (CI 11.7%,21.7%)                        | p<0.001        |
| None of the above (Sensory)                   | 51 (10%)              | 112 (71%)                 | -61% (CI -69.2%,-53.3%)                     | p<0.001        |

### *Perceived Stigma*

Only 3% of autistic respondents stated they did not feel anxious going to the doctor, compared to 33% of non-autistic respondents (difference 30%, 95%CI[-37.7%,-21.8%] p<0.001). Autistic respondents reported being “concerned I won’t be taken seriously when I describe my symptoms” (67%); worried about “wasting the doctor’s time” (66%) and “being considered a hypochondriac” (65%). They also reported difficulty “asking for help” (63%) and “discussing mental health” (59%). Autistic respondents reported that unusual behaviour or stimming elicited negative reactions from other patients (15%) reception staff (9%) or medical staff (7%) (Supplementary Table 2).



### *Planning and Organising*

Autistic respondents reported difficulties with summarising when describing medical problems, with 66% noting the “need to give the whole story and not leave anything out” compared to 12% of non-autistic respondents (difference 54%, 95%CI[47.1%,60.9%],  $p<0.001$ ). Autistic respondents reported difficulties with organisation and planning for healthcare, including difficulties “making an appointment in advance” (59%), “prioritising my health issues” (58%) and “making changes to my lifestyle or habits” (56%). Forty five percent reported forgetting a medical appointment and 30% had attended on the wrong day. (Supplementary Table 3).

### *Predictability and control*

Autistic respondents reported more difficulty with uncertainty than non-autistic respondents. Particular difficulties included not knowing the wait duration (70% vs 30%, difference 40%, 95%CI[31.5%,48.7%],  $p<0.001$ ), what would happen during the consultation (63% vs 16%, difference 47%, 95%CI[39.7%,54.7%],  $p<0.001$ ), which doctor they would see (58% vs 24%, difference 33%, 95%CI[25.0%,41.8%],  $p<0.001$ ) and the consultation length (40% vs 8%, difference 32%, 95%CI[25.6%,38.4%]  $p<0.001$ ).

### *Support needs*

Autistic adults reported physical mobility needs (16%), and unmet support needs in primary care e.g. “needing a support person to come with me” (21%). This extended to secondary

1  
2  
3 care: 17% had no one to support unexpected hospital admission, collection from hospital  
4  
5 (20%), or home care following discharge (26%). (Supplementary Table 4).  
6  
7  
8  
9

### 10 *Adverse consequences*

11  
12 Autistic respondents reported adverse consequences more frequently than non-autistic  
13 respondents, including untreated mental (69%) and physical (63%) health conditions. Notably  
14  
15 60% were told they “should have seen a doctor sooner” and 47% “did not attend referral to  
16  
17 a specialist”. Thirty-six percent “required more extensive treatment or surgery” and 34% did  
18  
19 not access treatment for a “potentially serious or life threatening condition”. Additionally,  
20  
21 they were less likely to “attend on schedule for screening programmes” than the non-autistic  
22  
23 respondents (39% vs 21%, difference 18%, 95%CI[9.8%,26.2%],  $p<0.001$ ) (Figure 1).  
24  
25  
26  
27  
28  
29  
30  
31  
32

33 [FIGURE 1 GOES HERE]  
34  
35  
36  
37

38 Compared to autistic respondents who had no difficulty visiting a doctor, those who  
39  
40 experienced difficulty (80%) reported more untreated mental and physical health conditions  
41  
42 ( $p<0.001$ ). They were also more likely to not attend specialist referral ( $p<0.001$ ), to need  
43  
44 more extensive treatment ( $p=0.009$ ), to experience untreated life-threatening conditions  
45  
46 ( $p=0.006$ ) and to not attend screening ( $p=0.028$ ) (Figure 2). Four percent of autistic  
47  
48 respondents reported no access to primary healthcare and did not attend any doctor at all.  
49  
50 This group differed from the non-autistic respondents who reported no access to primary  
51  
52 healthcare (5%) in two areas: all had difficulty visiting the doctor when needed, compared to  
53  
54 50% of non-attending non-autistic respondents ( $p=0.002$ ); and 95% of autistic non-attenders  
55  
56 had experienced at least one delayed treatment outcome, compared to 43% of non-  
57  
58  
59  
60

1  
2  
3 attending, non-autistic respondents ( $p=0.01$ ). There were no significant differences in  
4  
5 difficulty attending, barriers experienced or adverse outcomes between formally diagnosed  
6  
7 and self-identified autistic respondents.  
8  
9

10  
11  
12 [FIGURE 2 GOES HERE]  
13  
14  
15

### 16 17 *Facilitators*

18  
19 While most respondents (67% vs 65%) reported booking an appointment online would  
20  
21 facilitate access, autistic patients selected a need to “email my doctor in advance with a  
22  
23 description of the issue I need to discuss” (62%), “wait in a quiet place or outside until my  
24  
25 turn” (56%), and “book an appointment by text” (41%). Some autistic individuals would  
26  
27 benefit if they “could book the first or last appointment” (41%) or had a “sensory box available  
28  
29 in the waiting room” (16%) (Supplementary Table 5).  
30  
31  
32  
33  
34  
35

36  
37 Despite the outlined difficulties of visiting their doctor, autistic individuals felt their  
38  
39 relationship with their GP was “very important” or “important” significantly more than non-  
40  
41 autistic respondents (70% vs. 56%,  $p=0.001$ ), but only 33% of autistic respondents reported a  
42  
43 good relationship with their doctor ( $p<0.001$ ). Only 62% of autistic individuals reported that  
44  
45 their doctor knew they were autistic. Twenty two percent were unsure whereas 16% hadn’t  
46  
47 disclosed their diagnosis. Autistic respondents appreciated GPs who ask direct questions, give  
48  
49 clear explanations, are honest about not understanding autism but know that autism isn’t a  
50  
51 mental illness.  
52  
53  
54  
55  
56  
57  
58  
59  
60

1  
2  
3 *Associations between barriers and outcomes for autistic respondents*  
4  
5  
6  
7  
8

9 **Table 4: Barriers and Outcomes Associations for Autistic Respondents**  
10

|                                                                 | Untreated mental health condition | Untreated physical health condition | Specialist referral missed | Told they should have presented sooner | More extensive treatment or surgery required | Serious or life threatening condition |
|-----------------------------------------------------------------|-----------------------------------|-------------------------------------|----------------------------|----------------------------------------|----------------------------------------------|---------------------------------------|
| Difficulty using the telephone to book an appointment           | <b>p&lt;0.001</b>                 | <b>p&lt;0.001</b>                   | <b>p=0.036</b>             | <b>p=0.015</b>                         | n.s.                                         | <b>p=0.007</b>                        |
| Difficulty with advance planning                                | <b>p=0.020</b>                    | <b>p=0.032</b>                      | <b>p&lt;0.001</b>          | <b>p=0.030</b>                         | n.s.                                         | n.s.                                  |
| Difficulty communicating with reception staff                   | <b>p&lt;0.001</b>                 | <b>p&lt;0.001</b>                   | <b>p=0.008</b>             | <b>p&lt;0.001</b>                      | <b>p=0.041</b>                               | <b>p=0.004</b>                        |
| Difficulty communicating with the doctor during the appointment | <b>p&lt;0.001</b>                 | <b>p&lt;0.001</b>                   | <b>p&lt;0.001</b>          | <b>p=0.003</b>                         | <b>p=0.003</b>                               | <b>p=0.002</b>                        |
| The waiting room environment                                    | <b>p=0.007</b>                    | <b>p&lt;0.001</b>                   | n.s.                       | <b>p=0.010</b>                         | <b>p&lt;0.001</b>                            | n.s.                                  |
| Inability to see a known or preferred doctor                    | <b>p&lt;0.001</b>                 | <b>p=0.003</b>                      | n.s.                       | <b>p=0.027</b>                         | n.s.                                         | n.s.                                  |
| Waiting to see the doctor is too difficult                      | <b>p=0.018</b>                    | <b>p=0.001</b>                      | n.s.                       | n.s.                                   | <b>p=0.026</b>                               | n.s.                                  |
| Not feeling understood                                          | <b>p&lt;0.001</b>                 | <b>p&lt;0.001</b>                   | <b>p&lt;0.001</b>          | n.s.                                   | n.s.                                         | <b>p=0.026</b>                        |
| Needing a support person to come with me                        | n.s.                              | <b>p=0.002</b>                      | <b>p=0.004</b>             | n.s.                                   | <b>p=0.009</b>                               | <b>p=0.002</b>                        |

1  
2  
3 Table 4 outlines associations between reported barriers and outcomes for autistic  
4 respondents. There were no significant associations between any adverse outcomes and  
5  
6 difficulty deciding if symptoms warrant a GP visit, not having an online booking system, having  
7  
8 a confusing online booking system, having a long wait to get an appointment, or having  
9  
10 enough time to visit a doctor. In contrast, difficulty communicating with reception staff and  
11  
12 difficulty communicating with the doctor during appointments were both significantly  
13  
14 associated with all adverse outcomes.  
15  
16  
17  
18  
19  
20  
21  
22  
23

24 Difficulty using the telephone to book an appointment was significantly associated with all  
25  
26 adverse outcomes apart from having to undergo more extensive treatment or surgery than if  
27  
28 they had attended sooner. Challenges with the waiting room environment were significantly  
29  
30 associated with all adverse outcomes apart from missing specialist referrals and having a  
31  
32 potentially serious or life threatening condition for which they did not access treatment.  
33  
34 Difficulty planning an appointment in advance was significantly associated with all adverse  
35  
36 outcomes apart from having a potentially serious or life threatening condition for which they  
37  
38 did not access treatment, and having to undergo more extensive treatment or surgery than if  
39  
40 they had attended sooner. Needing a support person to attend appointments was  
41  
42 significantly associated with all adverse outcomes apart from having had a mental health  
43  
44 condition remain untreated due to difficulties accessing healthcare and being told they should  
45  
46 have presented sooner. Not feeling understood was significantly associated with all adverse  
47  
48 outcomes apart from being told they should have presented sooner and having to undergo  
49  
50 more extensive treatment or surgery than if they had attended sooner. Needing a support  
51  
52  
53  
54  
55  
56  
57  
58  
59  
60

1  
2  
3 person to attend with them was significantly associated with all adverse outcomes apart from  
4  
5 having untreated mental health conditions and being told they should have presented sooner.  
6  
7  
8  
9

10  
11 The inability to see a known or preferred doctor was significantly associated with having both  
12  
13 untreated mental and physical health conditions. It was also significantly associated with  
14  
15 being told they should have presented sooner. Finding waiting to see a doctor too difficult  
16  
17 was significantly associated with having both untreated mental and physical health  
18  
19 conditions. It was also significantly associated with having to undergo more extensive  
20  
21 treatment or surgery than if they had attended sooner.  
22  
23  
24  
25  
26  
27  
28  
29

30 Reporting no barriers to access healthcare had no significant associations with any of the  
31  
32 adverse outcomes.  
33  
34  
35  
36  
37  
38

## 39 Discussion

40  
41  
42 Our study describes the results of a survey of autistic adults and compares their experiences  
43  
44 with non-autistic adults. It highlights barriers faced by autistic people accessing and engaging  
45  
46 with primary healthcare. In our study these included greater difficulties deciding when to seek  
47  
48 care, reluctance to bother their GP, difficulties planning appointments and greater  
49  
50 communication difficulties – with particular emphasis on telephone use. Communication was  
51  
52 also impaired by anxiety and sensory issues. We linked those barriers to self-reported adverse  
53  
54 outcomes. Our data indicated that autistic people may present for healthcare later in the  
55  
56 natural course of an illness. Autistic participants reported reduced attendance for screening,  
57  
58  
59  
60

1  
2  
3 late presentations, missed opportunities for early detection and more extensive therapy  
4 being required. They also delayed or avoided healthcare because they didn't feel understood  
5  
6 by their doctors. Furthermore, a substantial minority of autistic adults did not disclose their  
7  
8 autism diagnosis which may impede identification of their autism-specific needs. These  
9  
10 barriers may have real consequences, as evidenced in reduced life expectancy, and higher  
11  
12 levels of physical and mental health conditions amongst autistic people.  
13  
14  
15  
16  
17  
18  
19

### 20 *Comparison with existing literature*

21  
22 This study confirms the findings of Nicolaidis,<sup>14</sup> Raymaker<sup>16</sup> and several recent reviews<sup>15,17,26</sup>,  
23  
24 which all identified three groups of barriers: (1) patient-level factors; (2) provider-level  
25  
26 factors; and (3) system-level factors. Our study stratifies individual barriers from the  
27  
28 perspective of autistic individuals. We couple these barriers to self-reported adverse  
29  
30 consequences, highlighting factors which may lead to excess morbidity and mortality in the  
31  
32 autistic population.  
33  
34  
35  
36  
37  
38  
39

### 40 *Strengths and limitations*

41  
42 Our study arose from a community-identified need to develop autism awareness training for  
43  
44 healthcare providers. It benefited from an autistic-led research team including autistic  
45  
46 doctors, using participatory methods. Our study provided a unique picture of autistic adults'  
47  
48 healthcare experiences, including those entirely excluded from healthcare due to access  
49  
50 barriers. In particular, we highlighted the difficulties with using the telephone which is a  
51  
52 distilled, concentrated essence of verbal communication.  
53  
54  
55  
56  
57  
58  
59  
60

1  
2  
3 As we used a convenience sample and self-report survey, generalisability of the data may be  
4  
5 limited. Respondents required the ability to complete the survey which excluded those with  
6  
7 reduced ability to self-report. Whilst we did not set out to create a validated tool, our survey  
8  
9 may have benefited from some validity and reliability testing. As the initial quality  
10  
11 improvement questionnaire was undertaken in the United Kingdom, we did not include issues  
12  
13 specific to other healthcare systems, such as cost or insurance. Our analyses did not account  
14  
15 for potential confounding factors, such as ethnicity or socio-economic status. Female  
16  
17 participants were over-represented in both groups which is not unusual for online surveys,  
18  
19 but is interesting given the higher rate of autism diagnosis in males. Whilst we noted  
20  
21 significant gender differences in relation to non-binary participants, these participants were  
22  
23 almost all autistic and we were therefore unable to attribute differences to gender identity  
24  
25 or autism with any degree of certainty. Furthermore, as this is a cross-sectional study, whilst  
26  
27 we can identify associations, we cannot confirm causality.  
28  
29  
30  
31  
32  
33  
34  
35  
36  
37

### 38 *Implications for Research*

39  
40 Our study suggests a need for personalised approaches to healthcare access. A prior study  
41  
42 investigated using a pre-visit telephone call to identify individualised accommodations.<sup>27</sup> Our  
43  
44 data suggest that this could be problematic for autistic adults. The AASPIRE Healthcare  
45  
46 Toolkit<sup>28</sup> includes a publicly available online program which generates a computerised report  
47  
48 of required healthcare accommodations. Adaptation of such a toolkit in NHS General Practice  
49  
50 should be considered and researched. Social care interventions and healthcare facilitators in  
51  
52 general practice have shown benefit with a vulnerable population,<sup>29</sup> similar approaches could  
53  
54 benefit an autistic population. The significant difficulties amongst the small number of autistic  
55  
56 people not registered with any GP indicate a need for further research into this group.  
57  
58  
59  
60



### *Implications for Clinical Practice*

Figure 3 outlines our proposed elements of an autism friendly practice. Such adjustments may minimise anxiety, manage sensory issues, and ensure mutual understanding – promoting clear, unambiguous communication. Autism friendly practices should employ a personalised approach, with a healthcare access needs assessment and, where possible, a specialist liaison nurse or facilitator.

[FIGURE 3 GOES HERE]

### *Implications for Policy*

Given the identified barriers, the extension of annual health checks to autistic adults<sup>30,31</sup> and the recently announced Oliver McGowan Mandatory Training in Learning Disability and Autism<sup>32</sup> are welcome. These will likely bring important benefits provided they are informed by the autistic community and autistic healthcare providers. Autism registers in GP practice have been recommended.<sup>33,34</sup> The success of such initiatives will likely depend on greater awareness by medical practitioners of autistic culture and communication needs. Specific training for GPs during core training and continuing professional development may be beneficial. GPs with a special interest in autism should be facilitated to develop their skills, but management of general health needs and co-occurring conditions fall within the remit of every GP. Implementing existing autism legislation or development where lacking is required in order to reduce health inequities for autistic people.

## **Conclusions**

1  
2  
3 Autistic people face barriers accessing the healthcare system, followed by difficulties  
4  
5 interacting with healthcare providers, which may contribute to known healthcare disparities  
6  
7 including increased morbidity and mortality. Our study has highlighted a variety of specific  
8  
9 barriers to accessing primary healthcare for autistic adults, including use of the telephone to  
10  
11 book appointments, not feeling understood, and difficulty communicating with doctors as  
12  
13 well as sensory and organisational issues which impede healthcare access. We identified a  
14  
15 variety of significant associations between self-reported barriers to healthcare access and  
16  
17 adverse outcomes for autistic respondents. One of our most impactful findings was the lack  
18  
19 of any significant differences between formally diagnosed and self-identified autistic  
20  
21 respondents in difficulty attending a GP, barriers experienced, or self-reported adverse  
22  
23 healthcare outcomes. Progress towards eliminating healthcare disparities for autistic people  
24  
25 may be achieved by understanding the healthcare experiences and access barriers for this  
26  
27 vulnerable patient group. These barriers represent not so much a failure to deliver or to avail  
28  
29 of healthcare, but a lack of intersection between the communication patterns of autistic  
30  
31 healthcare users and non-autistic providers. Reasonable accommodations are legally<sup>35</sup> and  
32  
33 morally required. Adjustments for communication needs are as necessary for autistic people  
34  
35 as ramps for wheelchair users.  
36  
37  
38  
39  
40  
41  
42  
43  
44  
45  
46

### **Figure legends**

47  
48  
49 Figure 1. Adverse Healthcare Outcomes

50 For all comparisons between autistic and non-autistic groups  $p < 0.001$ .

51  
52  
53 Figure 2. Adverse outcomes according to difficulty attending a GP

54 \*\* $p < 0.001$  \* $p < 0.05$

55 Note y-axis = N

56  
57  
58 Figure 3. Autism Friendly General Practice  
59  
60

### Author Contributions

Conception and design of study: M Doherty, S Neilson, J O'Sullivan, with contributions from those listed in acknowledgements.

Acquisition of data: M Doherty, S Neilson, J O'Sullivan

Analysis of data: S Neilson, M Doherty, SCK Shaw

Interpretation of data: M Doherty, S Neilson, J O'Sullivan, L Carravallah, M Johnson, W Cullen, SCK Shaw

Drafting and revising the manuscript: M Doherty, S Neilson, J O'Sullivan, L Carravallah, M Johnson, W Cullen, SCK Shaw

Approval of the version of the manuscript to be published: M Doherty, S Neilson, J O'Sullivan, L Carravallah, M Johnson, W Cullen, SCK Shaw

**Competing interests:** None.

**Funding:** We are grateful to AsIAm, Ireland's National Autism Charity and Scally's SuperValu, Clonakilty, for the funding to enable open access publication.

**Data availability statement:** Data are available upon reasonable request. All data relevant to this paper are included in the article or uploaded as supplementary information. Should further details or materials be required, please contact the corresponding author.

**Acknowledgements:** We are indebted to Professor Louise Gallagher for her guidance during the early stages of this project. We acknowledge the input received from the autistic adult community recruited via local groups and online contacts during the development of the online survey. Assistance with content, structure and proofreading of the surveys was received from nine autistic adults in Ireland and the UK. We received assistance from members of peer support group 'Autistic Doctors International'. We also thank Dr David Hillebrandt, Dr Natalie Teasdale, Elaine McGoldrick and Karen Leneh Buckle for their assistance during this project.

## References

1. Data CDC. Statistics. Autism Spectrum Disorder. Resource Document. Available at: <https://www.cdc.gov/ncbddd/autism/data.html> [Last accessed on 2021 Jul 24].
2. Royal College of Psychiatrists. The psychiatric management of autism in adults (CR228). Available at: <https://www.rcpsych.ac.uk/improving-care/campaigning-for-better-mental-health-policy/college-reports/2020-college-reports/cr228> [Last Accessed 2021 Jul 24]
3. Zerbo O, Massolo ML, Qian Y, Croen LA. A study of physician knowledge and experience with autism in adults in a large integrated healthcare system. *J Autism Dev Disord.* 2015;45(12):4002-14.
4. Nicolaidis C, Schnider G, Lee J, et al. Development and psychometric testing of the AASPIRE adult autism healthcare provider self-efficacy scale. *Autism.* Aug 2020. doi:10.1177/1362361320949734
5. Rydzewska E, Hughes-McCormack LA, Gillberg C, et al. General health of adults with autism spectrum disorders—A whole country population cross-sectional study. *Res Autism Spectr Disord.* 2019;60:59-66.
6. Croen LA, Zerbo O, Qian Y, et al. The health status of adults on the autism spectrum. *Autism.* 2015;19(7):814-23.
7. Ming X, Brimacombe M, Chaaban J, Zimmerman-Bier B, Wagner GC. Autism spectrum disorders: concurrent clinical disorders. *J Child Neurol.* 2008;23(1):6-13.
8. Flygare Wallen, E., Ljunggren, G., Carlsson, A.C., Pettersson, D. and Wändell, P., 2018. High prevalence of diabetes mellitus, hypertension and obesity among persons with a recorded diagnosis of intellectual disability or autism spectrum disorder. *J Intellect Disabil Res.* 62(4), pp.269-280.
9. Hirvikoski T, Mittendorfer-Rutz E, Boman M, Larsson H, Lichtenstein P, Bölte S. Premature mortality in autism spectrum disorder. *Br J Psychiatry.* 2016;208(3):232-8.
10. Hwang YI, Srasuebkul P, Foley KR, Arnold S, Trollor JN. Mortality and cause of death of Australians on the autism spectrum. *Autism Res.* 2019;12(5):806-15.
11. Bilder D, Botts EL, Smith KR, et al. Excess mortality and causes of death in autism spectrum disorders: a follow up of the 1980s Utah/UCLA autism epidemiologic study. *J Autism Dev Disord.* 2013;43(5):1196-204
12. Akobirshoev I, Mitra M, Dembo R, Lauer E. In-hospital mortality among adults with autism spectrum disorder in the United States: A retrospective analysis of US hospital discharge data. *Autism.* 2020;24(1):177-89.
13. Vohra R, Madhavan S, Sambamoorthi U. Emergency department use among adults with autism spectrum disorders (ASD). *J Autism Dev Disord.* 2016;46(4):1441-54.
14. Nicolaidis C, Raymaker D, McDonald K, et al. Comparison of healthcare experiences in autistic and non-autistic adults: a cross-sectional online survey facilitated by an academic-community partnership. *J Gen Intern Med.* 2013;28(6):761-9.
15. Walsh C, Lydon S, O'Dowd E, O'Connor P. Barriers to Healthcare for Persons with Autism: A Systematic Review of the Literature and Development of A Taxonomy. *Dev Neurorehabil.* 2020 Feb 8:1-8.
16. Raymaker DM, McDonald KE, Ashkenazy E, et al. Barriers to healthcare: Instrument development and comparison between autistic adults and adults with and without other disabilities. *Autism.* 2017;21(8):972-84
17. Mason D, Ingham B, Urbanowicz A, et al. A systematic review of what barriers and facilitators prevent and enable physical healthcare services access for autistic adults. *J Autism Dev Disord.* 2019;49(8):3387-400.
18. Vogan V, Lake JK, Tint A, Weiss JA, Lunskey Y. Tracking health care service use and the experiences of adults with autism spectrum disorder without intellectual disability: A longitudinal study of service rates, barriers and satisfaction. *Disabil Health J.* 2017;10(2):264-270.
19. Autism Act UK. Hm Government (ed). 2009. Available at: <https://www.legislation.gov.uk/ukpga/2009/15/contents>. [Last accessed on 2021 Jul 24].
20. Department of Health, 2010. "Implementing fulfilling and rewarding lives". Statutory guidance for local authorities and NHS organisation to support implementation of the autism strategy. Department of Health, London

- 1
  - 2
  - 3
  - 4
  - 5
  - 6
  - 7
  - 8
  - 9
  - 10
  - 11
  - 12
  - 13
  - 14
  - 15
  - 16
  - 17
  - 18
  - 19
  - 20
  - 21
  - 22
  - 23
  - 24
  - 25
  - 26
  - 27
  - 28
  - 29
  - 30
  - 31
  - 32
  - 33
  - 34
  - 35
  - 36
  - 37
  - 38
  - 39
  - 40
  - 41
  - 42
  - 43
  - 44
  - 45
  - 46
  - 47
  - 48
  - 49
  - 50
  - 51
  - 52
  - 53
  - 54
  - 55
  - 56
  - 57
  - 58
  - 59
  - 60
21. Buckley C. Making your practice autism friendly. *InnovAiT*. 2017;10(6):327-31.
22. Unigwe S, Buckley C, Crane L, Kenny L, Remington A, Pellicano E. GPs' confidence in caring for their patients on the autism spectrum: an online self-report study. *Br J Gen Pract*. 2017;67(659):e445-52.
23. AsIAM, 2016. A first for Ireland with Clonakilty becoming Ireland's first autism friendly town. Available at <https://asiam.ie/clonakilty-autism-friendly-town/> [Last accessed on 2021 Jul 24].
24. AsIAM, 2020. Are you ready to make your Clonakilty commitment for Autism? Available at: <https://asiam.ie/asiam-public-sector-training/autism-friendly-communities/>. [Last accessed on 2021 Jul 24].
25. The Autscope Organisation. *Autscope 2018: Exploring Inclusion*. Tonbridge, Kent: 2018. Available from: <http://www.autscope.org/2018/> [Last accessed on 2021 Jul 24].
26. Bradshaw P, Pellicano E, van Driel M, Urbanowicz A. How can we support the healthcare needs of autistic adults without intellectual disability?. *Curr Dev Disord Rep*. 2019;6(2):45-56
27. Saqr Y, Braun E, Porter K, Barnette D, Hanks C. Addressing medical needs of adolescents and adults with autism spectrum disorders in a primary care setting. *Autism*. 2018;22(1):51-61.
28. Nicolaidis C, Raymaker D, McDonald K, et al. The development and evaluation of an online healthcare toolkit for autistic adults and their primary care providers. *J Gen Intern Med*. 2016;31(10):1180-9.
29. Abel J, Kingston H, Scally A, et al. Reducing emergency hospital admissions: a population health complex intervention of an enhanced model of primary care and compassionate communities. *Br J Gen Pract*. 2018;68(676):e803-10.
30. National Institute for Health and Care Excellence. Long term plan. [London]: 2019. Chapter 3, Learning Disability and Autism. Available at: <https://www.longtermplan.nhs.uk/online-version/chapter-3-further-progress-on-care-quality-and-outcomes/a-strong-start-in-life-for-children-and-young-people/learning-disability-and-autism/> [Last accessed on 2021 Jul 24].
31. Harper G, Smith E, Parr J, et al. Autistica action briefing: health checks. Available at: <https://www.autistica.org.uk/downloads/files/Autistica-Action-Briefing-Health-Checks.pdf>. [Last accessed on 2021 Jul 24].
32. Health Education England. Partners announced to deliver the Oliver McGowan Mandatory Learning Disability and Autism training for all health and social care staff. Health Education England, 2020, <https://www.hee.nhs.uk/news-blogs-events/news/partners-announced-deliver-oliver-mcgowan-mandatory-learning-disability-autism-training-all-health> [Last accessed on 2021 Jul 24].
33. National Institute for Health and Care Excellence. The practice establishes and maintains a register of all patients with a diagnosis of autism. [London]: 2017. ([NM153]). Available at: <https://www.nice.org.uk/standards-and-indicators/qofindicators/the-practice-establishes-and-maintains-a-register-of-all-patients-with-a-diagnosis-of-autism> [Last accessed on 2021 Jul 24].
34. Westminster Commission on Autism. A Spectrum of Obstacles An Inquiry into Access to Healthcare for Autistic People. Available at [https://westminsterautismcommission.files.wordpress.com/2016/03/ar1011\\_ncg-autism-report-july-2016.pdf](https://westminsterautismcommission.files.wordpress.com/2016/03/ar1011_ncg-autism-report-july-2016.pdf) [Last accessed on 2021 Jul 24].
35. Great Britain. Equality Act 2010. London: Stationary Office; 2010.

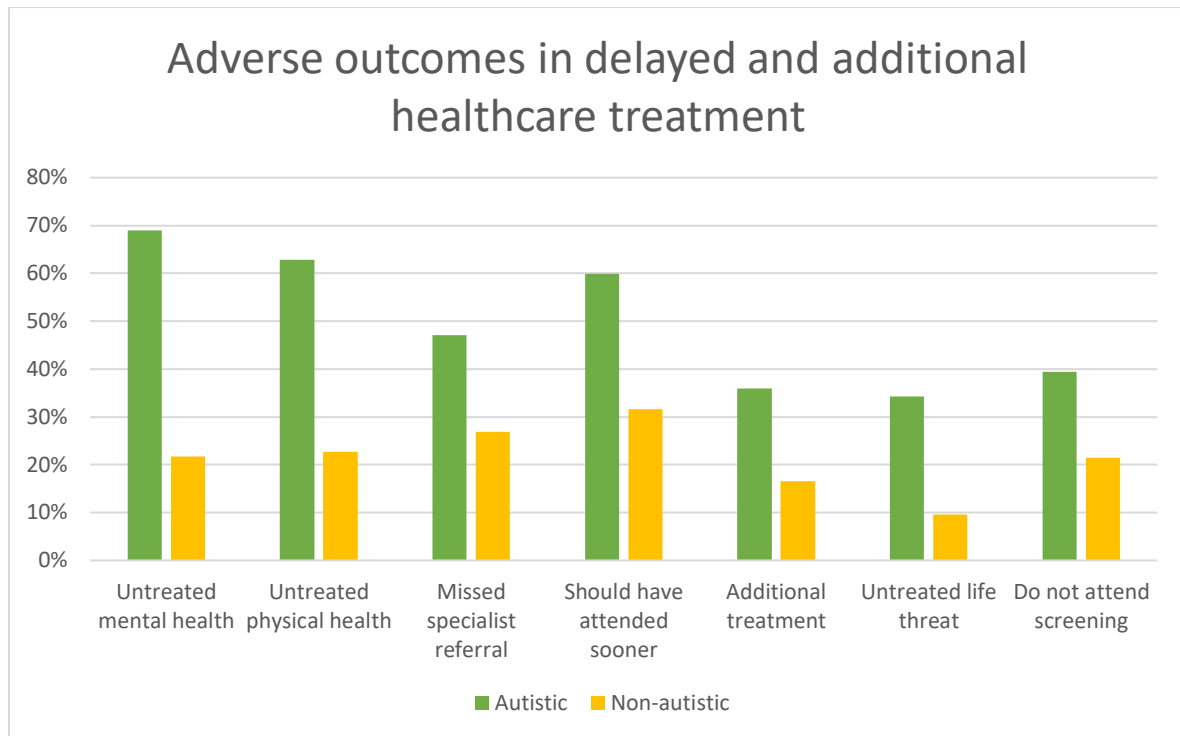

Figure 1. Adverse Healthcare Outcomes

For all comparisons between autistic and non-autistic groups  $p < 0.001$ .

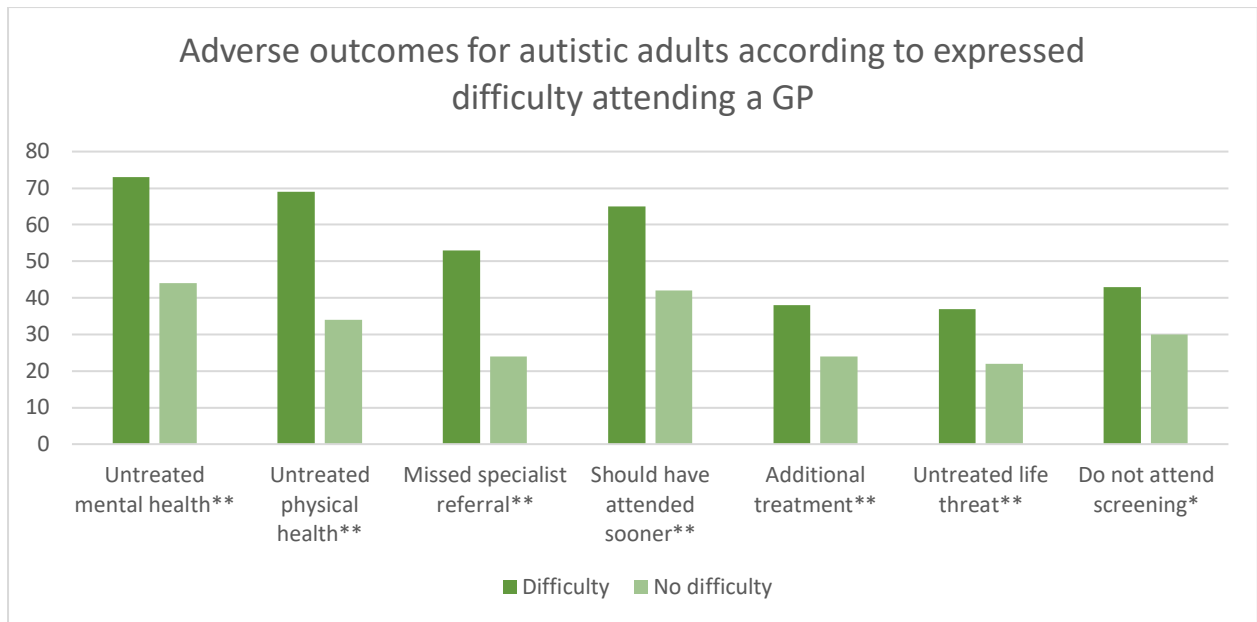

Figure 2. Adverse outcomes according to difficulty attending a GP

\*\*p<0.001 \*p<0.05

Note y-axis = N

Peer review only

1  
2  
3  
4  
5  
6  
7  
8  
9  
10  
11  
12  
13  
14  
15  
16  
17  
18  
19  
20  
21  
22  
23  
24  
25  
26  
27  
28  
29  
30  
31  
32  
33  
34  
35  
36  
37  
38  
39  
40  
41  
42  
43  
44  
45  
46  
47  
48  
49  
50  
51  
52  
53  
54  
55  
56  
57  
58  
59  
60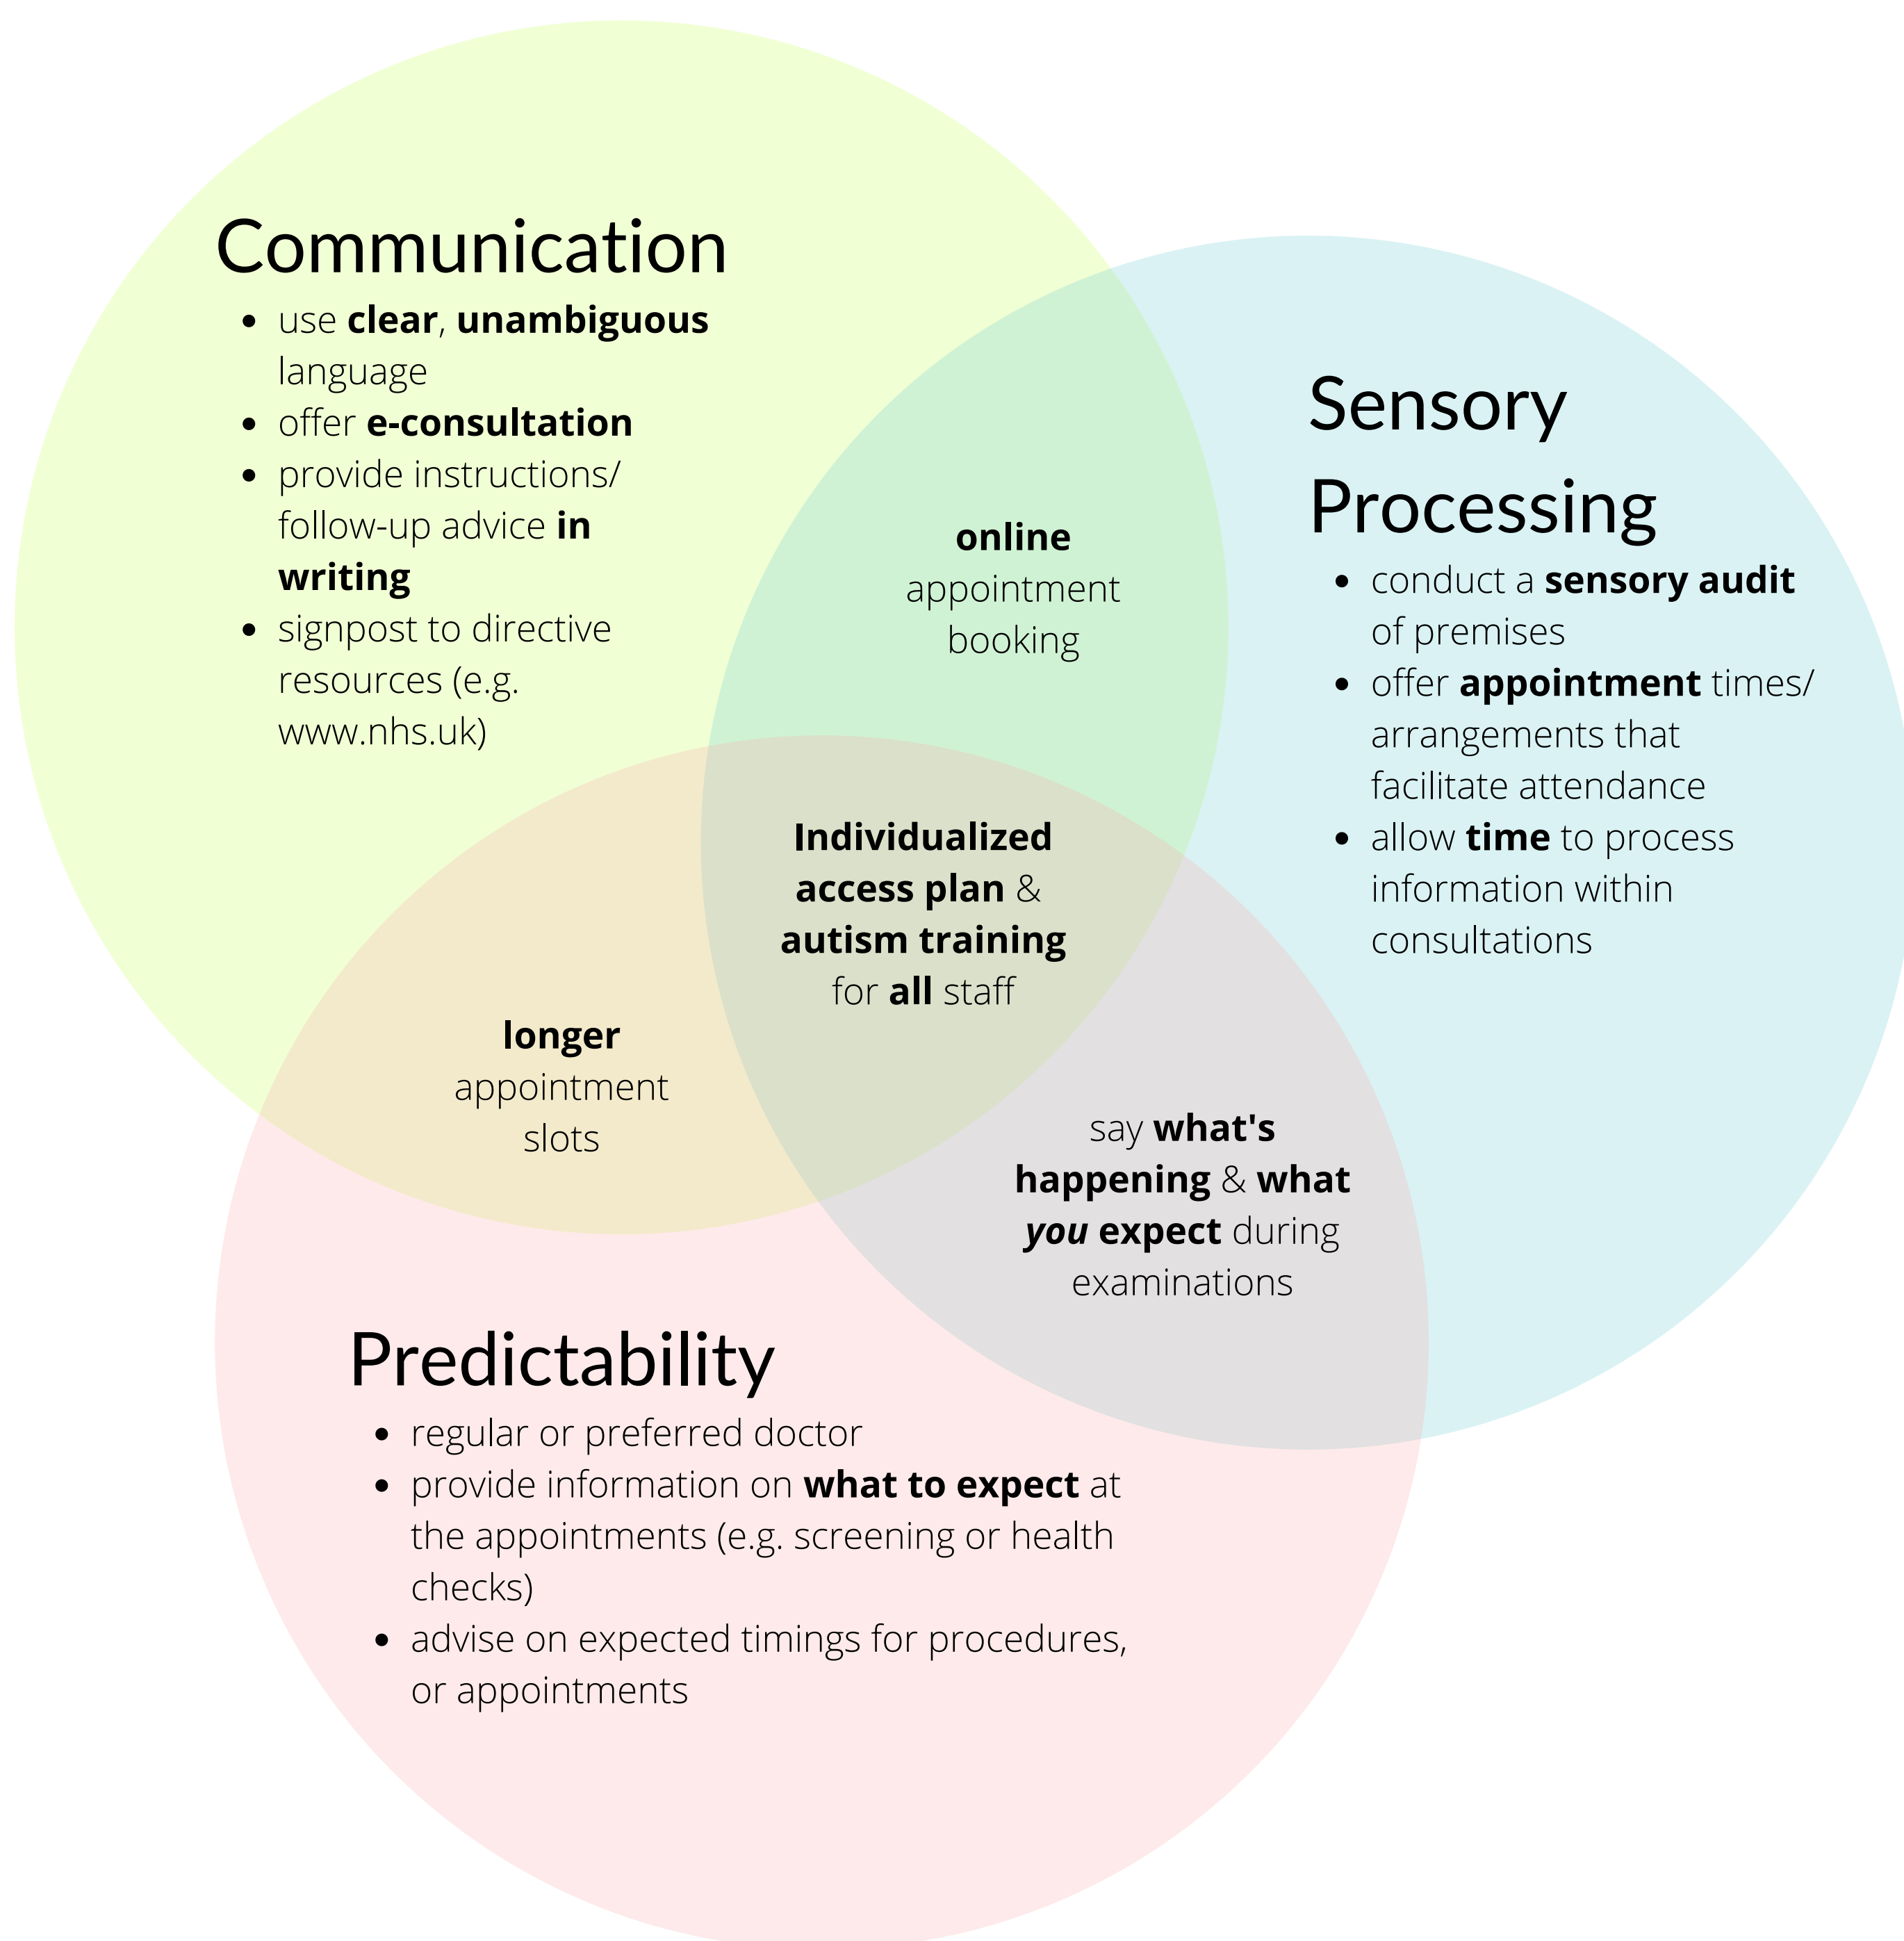



## Supplement 1

### Barriers to accessing healthcare for autistic adults: online survey

1  
2  
3  
4  
5  
6  
7  
8  
9  
10  
11  
12  
13  
14  
15  
16  
17  
18  
19  
20  
21  
22  
23  
24  
25  
26  
27  
28  
29  
30  
31  
32  
33  
34  
35  
36  
37  
38  
39  
40  
41  
42  
43  
44  
45  
46  
47  
48  
49  
50  
51  
52  
53  
54  
55  
56  
57  
58  
59  
60

1. Are you autistic?

Includes Autism, Autistic Spectrum Conditions, Asperger Syndrome, self-diagnosed or formally diagnosed.

- Yes  
 No

2. Do you usually attend the same medical practice?

- Yes  
 No  
 I don't attend any medical practice

3. Do you usually see the same doctor?

- Yes  
 No  
 I don't attend any doctor

4. Do you have difficulty visiting your doctor when you need to?

- Yes  
 No

5. Which of the following would cause you to delay or avoid seeing your doctor when you need to?

Please check ALL THAT APPLY

- Difficulty deciding if symptoms warrant a GP visit  
 Difficulty using the telephone to book appointment  
 No online booking system  
 There is an online booking system but it's confusing  
 Difficulty planning an appointment in advance  
 Difficulty communicating with the reception staff  
 Difficulty communicating with the doctor during the appointment  
 The waiting room environment  
 Inability to see a known or preferred doctor  
 Long wait to get an appointment  
 Waiting to see the doctor is too difficult  
 Not feeling understood  
 Not having enough time to visit the doctor  
 Needing a support person to come with me  
 Not having anyone to look after my child  
 None of the above

6. Which of the following is the most difficult part of booking an appointment?

Please choose the one issue which is MOST DIFFICULT for you

- 1  
2  
3  Using the telephone to book an appointment  
4  No online booking system  
5  There is an online booking system but it's confusing  
6  None of the above  
7  
8

9 7. Which of the following is the most difficult part of planning a visit?

10 Please choose the one issue which is MOST DIFFICULT for you

- 11  Deciding if your symptoms warrant a GP visit  
12  Long wait to get an appointment  
13  Planning an appointment in advance  
14  Inability to see a known or preferred doctor  
15  Not having enough time to visit the doctor  
16  Arranging for someone to come with me  
17  If you are a parent, not having anyone to look after your child  
18  None of the above  
19  
20  
21  
22

23 8. Which of the following is most difficult during an appointment?

24 Please choose the one issue which is MOST DIFFICULT for you

- 25  Communicating with the reception staff  
26  Communicating with the doctor during the appointment  
27  The waiting room environment  
28  Not feeling understood  
29  Waiting to see the doctor is difficult  
30  None of the above  
31  
32  
33

34 9. Do you visit your doctor...

35 Check ALL THAT APPLY

- 36  Alone, by choice  
37  Alone, but would prefer to have a support person  
38  With a parent, partner or support person  
39  With a parent, partner or support person but I would prefer to go alone  
40  With a support animal  
41  To support an autistic adult  
42  As a parent with my child  
43  
44  
45

46 10. Why do you usually visit your doctor?

47 Check ALL THAT APPLY

- 48  Physical condition or illness  
49  Mental health difficulties  
50  Issues directly related to autism  
51  Other  
52  
53

54 11. How much do you value your relationship with your GP?

- 55  It is very important to me  
56  It is important to me  
57  It is neither important nor unimportant to me  
58  It is not very important to me  
59  
60

1  
2  
3  It is not at all important to me  
4  
5

6 12. Do you have a good relationship with your doctor?

7  Yes

8  Sometimes

9  No

10  Not currently, but had good relationship with GP in past  
11  
12

13 13. Do you find it difficult to communicate during a consultation?

14  All the time

15  Frequently

16  Sometimes

17  Rarely

18  Not at all  
19  
20  
21

22 14. Which of the following communication issues cause you problems during a consultation?

23 Check ALL THAT APPLY

24  Verbal communication is difficult

25  Sensory issues make it harder to communicate

26  Anxiety makes it harder to communicate

27  It is easier for me to communicate in writing

28  I'm scared of the receptionist

29  I have difficulty asking for help

30  I have difficulty prioritising my health issues

31  I am concerned I might be labelled a hypochondriac or malingerer

32  Vague or open ended questions are difficult

33  I can't describe my pain or symptoms accurately

34  I express emotions differently (e.g. I can appear to be angry when I am afraid or in pain)

35  I need extra time to process what is being said

36  I am concerned I won't be taken seriously when I describe my symptoms

37  None of the above

38  Other  
39  
40  
41  
42  
43

44 15. Which communication issue causes you the MOST problems during a consultation?

45 Please choose the one issue which is MOST DIFFICULT for you

46  Verbal communication is difficult

47  Sensory issues make it harder to communicate

48  Anxiety makes it harder to communicate

49  It is easier for me to communicate in writing

50  I'm scared of the receptionist

51  I have difficulty asking for help

52  I have difficulty prioritising my health issues

53  I am concerned I might be labelled a hypochondriac or malingerer

54  Vague or open ended questions are difficult

55  I can't describe my pain or symptoms accurately

56  I express emotions differently (e.g. I can appear to be angry when I am afraid or in pain)

57  I need extra time to process what is being said  
58  
59  
60

- 1  
2  
3  I am concerned I won't be taken seriously when I describe my symptoms  
4  None of the above  
5  Other  
6  
7

8 16. Is stimming a problem for you at the doctors' office?

9 Check ALL THAT APPLY

- 10  My unusual behaviours or stimming elicit negative reactions from other patients  
11  My unusual behaviours or stimming elicit negative reactions from reception staff  
12  My unusual behaviours or stimming elicit negative reactions from medical staff  
13  I feel comfortable stimming at the doctors' office  
14  I do not feel comfortable stimming at the doctors' office  
15  I don't feel a need to stim at the doctors' office  
16  I don't understand the term "stimming"  
17  
18  
19

20 17. Do you experience any of the following?

21 Check ALL THAT APPLY

- 22  I find it difficult to make appointments in advance  
23  I have turned up for a medical appointment on the wrong day  
24  I have forgotten to attend a medical appointment  
25  I find it difficult to prioritise when describing my medical problems  
26  I need to give the whole story and not leave anything out  
27  I have forgotten why I made the appointment  
28  I find waiting difficult  
29  It is difficult to arrange someone to come with me  
30  I need to write things down  
31  I have difficulty making decisions about my health  
32  Making changes to my lifestyle or habits is difficult for me  
33  None of the above  
34  
35  
36  
37

38 18. Do you experience sensory issues which make it difficult to visit your doctor?

39 Check ALL THAT APPLY

- 40  Bright or fluorescent lights  
41  Noise in the waiting room from other patients  
42  Music playing in the waiting room  
43  Noise from the reception desk  
44  Smells in the waiting room  
45  Smells in the doctor's office  
46  Crowded waiting area  
47  Uncomfortable furniture  
48  Touch, such as during examination  
49  Unexpected touch  
50  None of the above  
51  Other  
52  
53  
54  
55  
56

57 19. How would you describe your pain threshold?

- 58  Very high  
59  High  
60

- 1  
2  
3  Neither particularly high nor low  
4  Low  
5  Very low  
6  I don't know  
7  
8

9 20. What communication methods do you use?

10 Check ALL THAT APPLY

- 11  Verbal, face-to-face  
12  Verbal, telephone  
13  Voicemail  
14  Text messaging  
15  Online messaging  
16  Email  
17  Other online method  
18  Written  
19  Alternative communication device  
20  Sign language  
21  Other  
22  
23  
24  
25

26 21. What communication methods do you AVOID if possible?

27 Check ALL THAT APPLY

- 28  Verbal, face-to-face  
29  Verbal, telephone  
30  Voicemail  
31  Text messaging  
32  Online messaging  
33  Other online method  
34  Email  
35  Written  
36  Alternative communication device  
37  Sign language  
38  Other  
39  
40  
41  
42

43 22. If your GP offered options for making an appointment, which would you be most likely  
44 to use?

- 45  Verbal, face-to-face  
46  Verbal, telephone  
47  Voicemail  
48  Text messaging  
49  Email  
50  Online booking system  
51  Alternative communication device  
52  Other  
53  
54  
55

56 23. My doctors are really good for me because they are...

57 Check ALL THAT APPLY

- 58  Patient  
59  
60

- 1  
2  
3  Good listeners  
4  Understanding  
5  Supportive  
6  Kind  
7  Friendly  
8  Efficient  
9  Familiar  
10  Not condescending  
11  Aware of my needs  
12  Honest about not understanding autism  
13  None of the above  
14  
15  
16  
17

18 24. My doctors are really good for me because they...

19 Check ALL THAT APPLY

- 20  Ask direct questions  
21  Give clear explanations  
22  Accept written or email communication  
23  Use printed information and diagrams  
24  Value my opinion  
25  Accept my right to make decisions regarding my health  
26  Know that autism is not a mental health condition  
27  Do home visits  
28  Have reception staff who are trained regarding autism  
29  Remind me to make my next appointment before leaving  
30  None of the above  
31  
32  
33  
34

35 25. Do you find it difficult not knowing...

36 Check ALL THAT APPLY

- 37  Which doctor you will see  
38  How long you will wait  
39  How long the consultation will last  
40  What will happen during the consultation  
41  None of the above  
42  
43  
44

45 26. When going to the doctor, what causes you to feel anxious?

46 Check ALL THAT APPLY

- 47  asking for help  
48  discussing mental health  
49  that there might be something wrong  
50  that I might be considered a hypochondriac  
51  that I might be wasting the doctor's time  
52  I don't feel anxious going to the doctor  
53  
54  
55

56 27. Do you have mobility needs which make visiting your doctor difficult?

- 57  Yes  
58  No  
59  
60

1  
2  
3 28. My doctor is knowledgeable about physical conditions:

- 4  Strongly agree  
5  Agree  
6  Neutral  
7  Disagree  
8  Strongly disagree  
9  
10

11 29. My doctor is knowledgeable about mental health conditions:

- 12  Strongly agree  
13  Agree  
14  Neutral  
15  Disagree  
16  Strongly disagree  
17  
18  
19

20 30. My doctor is knowledgeable about autism:

- 21  Strongly agree  
22  Agree  
23  Neutral  
24  Disagree  
25  Strongly disagree  
26  
27  
28

29 31. Visits to my doctor would be easier if...

30 Check ALL THAT APPLY

- 31  I could book an appointment online  
32  I could book an appointment by text  
33  I could book the first or last appointment of the day  
34  I could wait in a quiet place or outside until it was my turn  
35  I could email my doctor in advance with a description of the issue I need to discuss  
36  There was a sensory box available in the waiting room  
37  None of the above  
38  Other  
39  
40  
41

42 32. Have you ever had a mental health condition remain untreated due to difficulties  
43 accessing healthcare?

- 44  Yes  
45  No  
46  Possibly  
47  Other  
48  
49

50 33. Have you ever had a physical health condition remain untreated due to difficulties  
51 accessing healthcare?

- 52  Yes  
53  No  
54  Possibly  
55  Other  
56  
57  
58  
59  
60

1  
2  
3 34. Have you even been referred to a specialist but did not make an appointment or did not  
4 attend?

5  Yes

6  No

7  
8  
9 35. Have you ever been told you should have seen a doctor sooner?

10  Yes

11  No

12  
13  
14 36. Have you ever had to undergo more extensive treatment or surgery than if you had  
15 attended sooner?

16  Yes

17  No

18  
19  
20 37. Have you ever had a potentially serious or life threatening condition for which you did  
21 not access treatment?

22  Yes

23  No

24  
25  
26 38. If you answered yes to any of the last 6 questions, would you like to give more details?

27  
28  
29 39. Do you attend on schedule for screening programmes applicable to you?

30 Includes cervical screening, sexual health screening, breast check, colon screening etc.

31  Yes

32  No

33  Sometimes

34  
35  
36 40. If you were suddenly admitted to hospital, who would be able to bring your personal  
37 belongings to you?

38 Check ALL THAT APPLY

39  Spouse or partner

40  Parent

41  Other family member

42  Friend

43  Neighbour

44  Paid support person or carer

45  Volunteer support person or carer

46  Nobody available

47  Other

48  
49  
50  
51  
52 41. If you were admitted to hospital for a day case surgical procedure, who would be  
53 available to collect you afterwards?

54 Check ALL THAT APPLY

55  Spouse or partner

56  Parent

57  Other family member

58  Friend



- 1  
2  
3  Neighbour  
4  Paid support person or carer  
5  Volunteer support person or carer  
6  Nobody available  
7  Other  
8  
9

10  
11 42. If you needed assistance at home after an operation, who would be available to provide  
12 that care?

13 Check ALL THAT APPLY

- 14  Spouse or partner  
15  Parent  
16  Other family member  
17  Friend  
18  Neighbour  
19  Paid support person or carer  
20  Volunteer support person or carer  
21  Nobody available  
22  Other  
23  
24  
25

26  
27 43. If you are a parent and you were unable to care for your child due to illness, who would  
28 be available to provide that care to your child?

29 Check ALL THAT APPLY

- 30  Spouse or partner  
31  Parent  
32  Other family member  
33  Friend  
34  Neighbour  
35  Paid support person or carer  
36  Volunteer support person or carer  
37  Nobody available  
38  I don't have a child requiring care  
39  Other  
40  
41  
42

43 44. Do you identify as autistic?

44 Includes Autism, Autistic Spectrum Conditions, Asperger Syndrome, self-diagnosed or  
45 formally diagnosed.

- 46  Yes  
47  No  
48  Possibly  
49  
50  
51

52 45. Do you have a formal diagnosis? \*

- 53  Yes  
54  No  
55  
56

57 46. If you have a formal diagnosis, was it provided by:

- 58  Psychiatrist  
59  Clinical Psychologist  
60

- 1  
2  
3  Multidisciplinary Team  
4  Other  
5

6  
7 47. Does your doctor know you are autistic? \*

- 8  Yes  
9  No  
10  I don't know  
11

12  
13 48. What is your age?  
14

15 49. What age were you when you were diagnosed?  
16 If applicable  
17

18  
19 50. Which country do you live in?

- 20  England  
21  Scotland  
22  Wales  
23  Northern Ireland  
24  Republic of Ireland  
25  United States  
26  Canada  
27  Other:  
28  
29  
30

31 51. What is your gender?

- 32  Male  
33  Female  
34  Non-binary  
35  Prefer not to say  
36  
37

38 52. Please give any further information or suggestions here.  
39  
40  
41  
42  
43  
44  
45  
46  
47  
48  
49  
50  
51  
52  
53  
54  
55  
56  
57  
58  
59  
60

**Table S1 Access Barriers to Healthcare****Which of the following would cause you to delay or avoid seeing your doctor when you need to?**

|                                                                 | <b>Autistic n (%)</b> | <b>Non-autistic n (%)</b> | <b>Difference (95% Confidence Interval)</b> | <b>p value</b> |
|-----------------------------------------------------------------|-----------------------|---------------------------|---------------------------------------------|----------------|
| Difficulty deciding if symptoms warrant a GP visit              | 366 (72%)             | 102 (65%)                 | 7% (CI -1.6%,16.1%)                         | p=0.102 ns     |
| Difficulty using the telephone to book appointment              | 314 (62%)             | 25 (16%)                  | 46% (CI 38.5%,53.5%)                        | p<0.001        |
| Not feeling understood                                          | 283 (56%)             | 21 (13%)                  | 42% (CI 35.2%,49.7%)                        | p<0.001        |
| Difficulty communicating with the doctor during the appointment | 269 (53%)             | 10 (6%)                   | 47% (CI 40.5, 52.9%)                        | p<0.001        |
| The waiting room environment                                    | 256 (51%)             | 12 (8%)                   | 43% (CI 36.4%,49.3%)                        | p<0.001        |
| Long wait to get an appointment                                 | 251 (50%)             | 70 (45%)                  | 5% (CI -4.4%,14.2%)                         | p=0.324 ns     |
| Difficulty planning an appointment in advance                   | 243 (48%)             | 51 (33%)                  | 15% (CI 6.5%,24.4%)                         | p<0.001        |
| Inability to see a known or preferred doctor                    | 241 (48%)             | 35 (23%)                  | 25% (CI 17.0%,33.5%)                        | p<0.001        |
| Difficulty communicating with the reception staff               | 235 (46%)             | 13 (8%)                   | 38% (CI 31.5%,44.6%)                        | p<0.001        |
| Not having enough time to visit the doctor                      | 174 (34%)             | 61 (39%)                  | -5% (CI -13.6%,4.6%)                        | p=0.346 ns     |
| No online booking system                                        | 160 (32%)             | 35 (23%)                  | 9% (CI 1.2%,17.3%)                          | p=0.033        |
| Waiting to see the doctor is too difficult                      | 114 (23%)             | 7 (5%)                    | 18% (CI 12.7%,23.3%)                        | p<0.001        |
| Needing a support person to come with me                        | 106 (21%)             | 7 (5%)                    | 16% (CI 11.2%,21.7%)                        | p<0.001        |
| There is an online booking system but it's confusing            | 102 (20%)             | 9 (6%)                    | 14% (CI 8.9%,19.8%)                         | p<0.001        |
| Not having anyone to look after my child                        | 66 (13%)              | 18 (12%)                  | 2% (CI -4.6%,7.8%)                          | p=0.708 ns     |
| None of the above                                               | 6 (1%)                | 17 (11%)                  | -10% (CI -15.0%,-4.3%)                      | p<0.001        |



Table S3 Planning and Organising

|                                                                       | <b>Autistic n (%)</b> | <b>Non-<br/>autistic n (%)</b> | <b>Difference<br/>(95% Confidence Interval)</b> | <b>p value</b> |
|-----------------------------------------------------------------------|-----------------------|--------------------------------|-------------------------------------------------|----------------|
| I find it difficult to prioritise when describing my medical problems | 333 (66%)             | 34 (22%)                       | 44% (CI 36.0%,52.1%)                            | p<0.001        |
| I need to give the whole story and not leave anything out             | 332 (66%)             | 18 (12%)                       | 54% (CI 47.1%,60.9%)                            | p<0.001        |
| I find it difficult to make appointments in advance                   | 300 (59%)             | 45 (29%)                       | 31% (CI 21.8%,39.2%)                            | p<0.001        |
| Making changes to my lifestyle or habits is difficult for me          | 282 (56%)             | 36 (23%)                       | 33% (CI 24.4%,41.0%)                            | p<0.001        |
| I have forgotten to attend a medical appointment                      | 230 (45%)             | 34 (22%)                       | 24% (CI 15.5%,31.9%)                            | p<0.001        |
| I need to write things down                                           | 227 (45%)             | 17 (11%)                       | 34% (CI 27.0%,40.9%)                            | p<0.001        |
| I find waiting difficult                                              | 221 (44%)             | 15 (10%)                       | 34% (CI 27.3%,40.8%)                            | p<0.001        |
| I have difficulty making decisions about my health                    | 222 (44%)             | 20 (13%)                       | 31% (CI 23.9%,38.2%)                            | p<0.001        |
| I have turned up for a medical appointment on the wrong day           | 151 (30%)             | 16 (10%)                       | 20% (CI 13.0%,26.2%)                            | p<0.001        |
| It is difficult to arrange someone to come with me                    | 103 (20%)             | 2 (1%)                         | 19% (CI 14.7%,23.4%)                            | p<0.001        |
| I have forgotten why I made the appointment                           | 54 (11%)              | 1 (1%)                         | 10% (CI 6.6%,13.4%)                             | p<0.001        |
| None of the above                                                     | 13 (3%)               | 64 (41%)                       | -38% (CI -46.4%,-30.0%)                         | p<0.001        |

**Table S4 Support Needs**

| <b><u>Do you visit your doctor:</u></b>                                 | <b>Autistic n (%)</b> | <b>Non-autistic n (%)</b> | <b>Difference (95% Confidence Interval)</b> | <b>p value</b> |
|-------------------------------------------------------------------------|-----------------------|---------------------------|---------------------------------------------|----------------|
| Alone, by choice                                                        | 306 (60%)             | 134 (85%)                 | -25% (CI -32.4%,-17.6%)                     | p<0.001        |
| Alone, but would prefer to have a support person                        | 165 (33%)             | 10 (6%)                   | 26% (CI 20.2%,32.2%)                        | p<0.001        |
| With a parent, partner or support person                                | 137 (27%)             | 9 (6%)                    | 21% (CI 15.6%,27.0%)                        | p<0.001        |
| With a parent, partner or support person but I would prefer to go alone | 12 (2%)               | 0 (0%)                    | 2% (CI 0.6%,4.1%)                           | p=0.109 ns     |
| With a support animal                                                   | 5 (1%)                | 0 (0%)                    | 1% (CI -0.3%,2.3%)                          | p=0.471 ns     |
| To support an autistic adult                                            | 26 (5%)               | 0 (0%)                    | 5% (CI 2.8%,7.5%)                           | p=0.008        |
| As a parent to access healthcare for my child                           | 78 (15%)              | 30 (19%)                  | -4% (CI -11.0%,3.6%)                        | p=0.327 ns     |
| With my child, but I would prefer to go alone                           | 6 (1%)                | 12 (8%)                   | -7% (CI -11.1%,-1.8%)                       | p<0.001        |

**If you were suddenly admitted to hospital, who would be able to bring your personal belongings to you?**

|                                   | <b>Autistic n (%)</b> | <b>Non-autistic n (%)</b> | <b>Difference (95% Confidence Interval)</b> | <b>p value</b> |
|-----------------------------------|-----------------------|---------------------------|---------------------------------------------|----------------|
| Spouse or partner                 | 234 (46%)             | 106 (68%)                 | -21% (CI -30.3%,-12.4%)                     | p<0.001        |
| Parent                            | 168 (33%)             | 70 (45%)                  | -11% (CI -20.7%,-2.2%)                      | p=0.012        |
| Other family member               | 96 (19%)              | 72 (46%)                  | -27% (CI -35.8%,-18.0%)                     | p<0.001        |
| Friend                            | 118 (23%)             | 57 (36%)                  | -13% (CI -21.8%,-4.2%)                      | p=0.002        |
| Neighbour                         | 17 (3%)               | 14 (9%)                   | -6% (CI -10.7%,-0.4%)                       | p=0.008        |
| Paid support person or carer      | 15 (3%)               | 1 (1%)                    | 2% (CI -0.0%,4.7%)                          | p=0.174 ns     |
| Volunteer support person or carer | 6 (1%)                | 0 (0%)                    | 1% (CI -0.2%,2.5%)                          | p=0.375 ns     |
| Nobody available                  | 88 (17%)              | 5 (3%)                    | 14% (CI 9.5%,18.9%)                         | p<0.001        |

**If you were admitted to hospital for a day case surgical procedure, who would be available to collect you afterwards?**

|                   | <b>Autistic n (%)</b> | <b>Non-autistic n (%)</b> | <b>Difference (95% Confidence Interval)</b> | <b>p value</b> |
|-------------------|-----------------------|---------------------------|---------------------------------------------|----------------|
| Spouse or partner | 208 (41%)             | 100 (64%)                 | -23% (CI -31.7%,-13.6%)                     | p<0.001        |

|                                   |           |          |                         |            |
|-----------------------------------|-----------|----------|-------------------------|------------|
| Parent                            | 176 (35%) | 73 (47%) | -12% (CI -21.0%,-2.5%)  | p=0.010    |
| Other family member               | 96 (19%)  | 75 (48%) | -29% (CI -37.8%,-19.9%) | p<0.001    |
| Friend                            | 116 (23%) | 67 (43%) | -29% (CI -37.8%,-19.9%) | p<0.001    |
| Neighbour                         | 17 (3%)   | 8 (5%)   | -2% (CI -5.9%,2.5%)     | p=0.446 ns |
| Paid support person or carer      | 17 (3%)   | 0 (0%)   | 3% (CI 1.4%,5.3%)       | p=0.042    |
| Volunteer support person or carer | 3 (1%)    | 0 (0%)   | 1% (CI -0.5%,1.7%)      | p=0.776 ns |
| Nobody available                  | 99 (20%)  | 3 (2%)   | 18% (CI 13.1%,22.1%)    | p<0.001    |

**If you needed assistance at home after an operation, who would be available to provide that care?**

|                                   | Autistic n (%) | Non-autistic n (%) | Difference (95% Confidence Interval) | p value    |
|-----------------------------------|----------------|--------------------|--------------------------------------|------------|
| Spouse or partner                 | 219 (43%)      | 101 (64%)          | -21% (CI -30.2%,-12.1%)              | p<0.001    |
| Parent                            | 152 (30%)      | 74 (47%)           | -17% (CI -26.3%,-8.0%)               | p<0.001    |
| Other family member               | 83 (16%)       | 61 (39%)           | -23% (CI -31.2%,-13.8%)              | p<0.001    |
| Friend                            | 74 (15%)       | 43 (27%)           | -13% (CI -20.8%,-4.8%)               | p<0.001    |
| Neighbour                         | 14 (3%)        | 8 (5%)             | -2% (CI -6.5%,1.8%)                  | p=0.241 ns |
| Paid support person or carer      | 30 (6%)        | 3 (2%)             | 4% (CI 0.6%,7.4%)                    | p=0.071 ns |
| Volunteer support person or carer | 4 (1%)         | 0 (0%)             | 1% (CI -0.4%,2.0%)                   | p=0.599 ns |
| Nobody available                  | 131 (26%)      | 13 (8%)            | 18% (CI 11.4%,23.7%)                 | p<0.001    |

**If you are a parent and you were unable to care for your child due to illness, who would be available to provide that care to your child?**

|                     | Autistic n (%) | Non-autistic n (%) | Difference (95% Confidence Interval) | p value |
|---------------------|----------------|--------------------|--------------------------------------|---------|
| Spouse or partner   | 110 (22%)      | 64 (41%)           | -19% (CI -28.0%,-10.2%)              | p<0.001 |
| Parent              | 37 (7%)        | 40 (26%)           | -18% (CI -25.8%,-10.6%)              | p<0.001 |
| Other family member | 40 (8%)        | 40 (26%)           | -18% (CI -25.2%,-10.0%)              | p<0.001 |
| Friend              | 21 (4%)        | 27 (17%)           | -13% (CI -19.6%,-6.5%)               | p<0.001 |
| Neighbour           | 4 (1%)         | 8 (5%)             | -5% (CI -8.2%,-0.4%)                 | p<0.001 |

1  
2  
3  
4  
5  
6  
7  
8  
9  
10  
11  
12  
13  
14  
15  
16  
17  
18  
19  
20  
21  
22  
23  
24  
25  
26  
27  
28  
29  
30  
31  
32  
33  
34  
35  
36  
37  
38  
39  
40  
41  
42  
43  
44  
45  
46

|                                     |           |          |                      |            |
|-------------------------------------|-----------|----------|----------------------|------------|
| Paid support person or carer        | 5 (1%)    | 9 (6%)   | -5% (CI -8.9%,-0.6%) | p<0.001    |
| Volunteer support person or carer   | 1 (1%)    | 0 (0%)   | 0% (CI -0.4%,0.8%)   | p=1.000 ns |
| Nobody available                    | 34 (7%)   | 6 (4%)   | 3% (CI -1.2%,7.0%)   | p=0.256 ns |
| I don't have a child requiring care | 274 (54%) | 78 (50%) | 4% (CI -5.0%,13.7%)  | p=0.387 ns |

For peer review only



Table S5 Facilitators

| <b>Visits to my doctor would be easier if:</b>                             | <b>Autistic n (%)</b> | <b>Non-autistic n (%)</b> | <b>Difference (95% Confidence Interval)</b> | <b>p value</b> |
|----------------------------------------------------------------------------|-----------------------|---------------------------|---------------------------------------------|----------------|
| I could book an appointment online                                         | 339 (67%)             | 102 (65%)                 | 2% (CI -7.0%,10.8%)                         | p=0.732 ns     |
| I could email in advance with a description of the issue I need to discuss | 316 (62%)             | 35 (22%)                  | 40% (CI 31.9%,48.2%)                        | p<0.001        |
| I could wait in a quiet place or outside until it was my turn              | 284 (56%)             | 13 (8%)                   | 48% (CI 41.2%,54.3%)                        | p<0.001        |
| I could book the first or last appointment of the day                      | 210 (41%)             | 38 (24%)                  | 17% (CI 8.8%,25.6%)                         | p<0.001        |
| I could book an appointment by text                                        | 209 (41%)             | 44 (28%)                  | 13% (CI 4.6%,21.8%)                         | p=0.004        |
| There was a sensory box* available in the waiting room                     | 80 (16%)              | 4 (3%)                    | 13% (CI 8.8%,17.7%)                         | p<0.001        |
| None of the above                                                          | 16 (3%)               | 34 (22%)                  | -19% (CI -25.5%,-11.5%)                     | p<0.001        |

\*A sensory box contains items to manage sensory stress, such as sunglasses, ear defenders or ear plugs, items providing tactile sensory input such as fidget tools and olfactory input such as scented items.

# BMJ Open

## Barriers to healthcare and self-reported adverse outcomes for autistic adults: A cross-sectional study.

|                                 |                                                                                                                                                                                                                                                                                                                                                                                        |
|---------------------------------|----------------------------------------------------------------------------------------------------------------------------------------------------------------------------------------------------------------------------------------------------------------------------------------------------------------------------------------------------------------------------------------|
| Journal:                        | <i>BMJ Open</i>                                                                                                                                                                                                                                                                                                                                                                        |
| Manuscript ID                   | bmjopen-2021-056904.R2                                                                                                                                                                                                                                                                                                                                                                 |
| Article Type:                   | Original research                                                                                                                                                                                                                                                                                                                                                                      |
| Date Submitted by the Author:   | 20-Dec-2021                                                                                                                                                                                                                                                                                                                                                                            |
| Complete List of Authors:       | Doherty, Mary; Our Lady's Hospital, Department of Anaesthesia<br>Neilson, Stuart; Independent Researcher<br>O'Sullivan, Jane; Mater Private Hospital, Anaesthetics<br>Carravallah, Laura; Michigan State University, Paediatrics and Human Development<br>Johnson, Mona; NHS Digital<br>Cullen, Walter; UCD, School of Medicine<br>Shaw, Sebastian; Brighton and Sussex Medical School |
| <b>Primary Subject Heading</b>: | General practice / Family practice                                                                                                                                                                                                                                                                                                                                                     |
| Secondary Subject Heading:      | Patient-centred medicine, Health policy                                                                                                                                                                                                                                                                                                                                                |
| Keywords:                       | PRIMARY CARE, Adult psychiatry < PSYCHIATRY, Health policy < HEALTH SERVICES ADMINISTRATION & MANAGEMENT                                                                                                                                                                                                                                                                               |
|                                 |                                                                                                                                                                                                                                                                                                                                                                                        |

SCHOLARONE™  
Manuscripts



I, the Submitting Author has the right to grant and does grant on behalf of all authors of the Work (as defined in the below author licence), an exclusive licence and/or a non-exclusive licence for contributions from authors who are: i) UK Crown employees; ii) where BMJ has agreed a CC-BY licence shall apply, and/or iii) in accordance with the terms applicable for US Federal Government officers or employees acting as part of their official duties; on a worldwide, perpetual, irrevocable, royalty-free basis to BMJ Publishing Group Ltd ("BMJ") its licensees and where the relevant Journal is co-owned by BMJ to the co-owners of the Journal, to publish the Work in this journal and any other BMJ products and to exploit all rights, as set out in our [licence](#).

The Submitting Author accepts and understands that any supply made under these terms is made by BMJ to the Submitting Author unless you are acting as an employee on behalf of your employer or a postgraduate student of an affiliated institution which is paying any applicable article publishing charge ("APC") for Open Access articles. Where the Submitting Author wishes to make the Work available on an Open Access basis (and intends to pay the relevant APC), the terms of reuse of such Open Access shall be governed by a Creative Commons licence – details of these licences and which [Creative Commons](#) licence will apply to this Work are set out in our licence referred to above.

Other than as permitted in any relevant BMJ Author's Self Archiving Policies, I confirm this Work has not been accepted for publication elsewhere, is not being considered for publication elsewhere and does not duplicate material already published. I confirm all authors consent to publication of this Work and authorise the granting of this licence.

# Barriers to healthcare and self-reported adverse outcomes for autistic adults: a cross-sectional study

## Barriers to healthcare for autistic adults

Mary Doherty<sup>1</sup>; Stuart Neilson<sup>2</sup>; Jane O'Sullivan<sup>3</sup>; Laura Carravallah<sup>4</sup>; Mona Johnson<sup>5</sup>; Walter Cullen<sup>6</sup>; Sebastian C. K. Shaw<sup>7</sup>

<sup>1</sup>Department of Anaesthesia, Our Lady's Hospital, Navan, Meath, Ireland; <sup>2</sup>Independent Researcher, Cork, Ireland; <sup>3</sup>Department of Anaesthesia, Mater Private Hospital, Dublin, Ireland; <sup>4</sup>Michigan State University, Paediatrics and Human Development, Medicine; <sup>5</sup>NHS Digital; <sup>6</sup>University College Dublin, College of Health Sciences, Department of Health Sciences; <sup>7</sup>Brighton and Sussex Medical School, Brighton, United Kingdom

### **Corresponding author:**

Dr Mary Doherty  
Department of Anaesthesia  
Our Lady's Hospital, Navan, Meath, Ireland  
[drmdoherty@gmail.com](mailto:drmdoherty@gmail.com)  
+353872209386

### **Keywords**

Adult autism, Healthcare barriers, Healthcare outcomes, Accommodations

|                     |      |
|---------------------|------|
| Abstract wordcount  | 288  |
| Main text wordcount | 3606 |

## Abstract

### Objectives:

Autistic people experience poor physical and mental health along with reduced life expectancy compared to non-autistic people. Our aim was to identify self-reported barriers to primary care access by autistic adults compared to non-autistic adults and to link these barriers to self-reported adverse health consequences.

### Design:

Following consultation with the autistic community at an autistic conference, *Autscope*, we developed a self-report survey which we administered online through social media platforms.

### Setting:

The 52-item, international, online survey.

### Participants:

507 autistic adults and 157 non-autistic adults.

### Primary and secondary outcome measures:

Self-reported barriers to accessing healthcare and associated adverse health outcomes.

### Results:

Eighty percent of autistic adults and 37% of non-autistic respondents reported difficulty visiting a General Practitioner (GP). The highest-rated barriers by autistic adults were deciding if symptoms warrant a GP visit (72%), difficulty making appointments by telephone (62%), not feeling understood (56%), difficulty communicating with their doctor (53%) and the waiting room environment (51%). Autistic adults reported a preference for online or text based appointment booking, facility to email in advance the reason for consultation, the first or last clinic appointment and a quiet place to wait. Self-reported adverse health outcomes experienced by autistic adults were associated with barriers to accessing healthcare. Adverse outcomes included untreated physical and mental health conditions, not attending specialist referral or screening programmes, requiring more extensive treatment or surgery due to late presentations, and untreated potentially life threatening conditions. There were no significant differences in difficulty attending, barriers experienced or adverse outcomes between formally diagnosed and self-identified autistic respondents.

### Conclusions:

Reduction of healthcare inequalities for autistic people requires that healthcare providers understand autistic perspectives, communication needs and sensory sensitivities. Adjustments for autism specific needs are as necessary as ramps for wheelchair users.

### Strengths and limitations of this study

Our study arose from a community-identified need to develop autism awareness training for healthcare providers and benefited from an autistic-led research team including autistic medical doctors, using participatory methods.

To date, this large cross-sectional study is the first to explore the associations between barriers to accessing healthcare and self-reported adverse health outcomes for autistic adults.

As we used a convenience sample and self-report survey, generalisability of the data may be limited.

As the initial pilot questionnaire was undertaken in the United Kingdom, we did not include issues specific to other healthcare systems, such as cost or insurance, in this study.

# Barriers to healthcare and self-reported adverse outcomes for autistic adults: a cross-sectional study

## Introduction

Autism is a common neurodevelopmental condition affecting 1-2% of the population.<sup>1</sup> While autism is lifelong and heterogeneous in presentation, most autistic people are adult, do not have intellectual disability and are likely to be undiagnosed.<sup>2</sup> Doctors may underestimate the number of autistic patients under their care.<sup>3,4</sup> Autistic adults have poor physical and mental health compared to the general population.<sup>5</sup> Most medical conditions are more prevalent in the autistic population,<sup>6,7</sup> including diabetes, hypertension and obesity.<sup>8</sup> Autistic people experience premature mortality.<sup>9,10,11</sup> Life expectancy is potentially reduced by 16-30 years, with increased mortality across almost all diagnostic categories.<sup>9</sup> In-hospital mortality is also increased.<sup>12</sup> Autistic people are over twice as likely to use emergency departments,<sup>13</sup> and to die after attending emergency care and three times as likely to require inpatient admission.<sup>14</sup>

Alongside increased health needs, autistic people report a greater likelihood that these needs are unmet.<sup>13</sup> Pervasive, multifactorial barriers to healthcare access are experienced.<sup>15</sup> Some are shared by other disabled people, but autistic patients experience additional autism-specific barriers.<sup>16</sup> Patient-provider communication, sensory sensitivities, executive functioning/planning difficulties, and prior negative experiences with healthcare providers are important barriers.<sup>17,18</sup>

1  
2  
3  
4  
5  
6 In response to primary legislation<sup>19</sup> and statutory guidance,<sup>20</sup> the Royal College of General  
7  
8 Practitioners (RCGP) developed an Autism Patient Charter.<sup>21</sup> This recommended: staff  
9  
10 awareness and training; autism friendly environment; reasonable adjustments following  
11  
12 disclosure or clinical suspicion of autism; patient-tailored communications; and behaviour-  
13  
14 sensitive accommodations.<sup>21</sup> Despite efforts to champion autism, proposals to formalise  
15  
16 autism training,<sup>18,22</sup> and specific awareness-raising interventions,<sup>21</sup> almost 40% of general  
17  
18 practitioners (GPs) report no formal training in autism.<sup>22</sup> They also report limited confidence  
19  
20 in managing autistic patients.<sup>22</sup> Greater autism awareness exists where GPs have personal  
21  
22 knowledge of autism, either through a relative or friend on the autistic spectrum, or because  
23  
24 they themselves are autistic.<sup>22</sup> Communication skills training for health care providers may be  
25  
26 the most pressing need.<sup>4</sup> GPs<sup>22</sup> and hospital specialists<sup>3</sup> report difficulties communicating  
27  
28 with autistic patients. Only 25% of primary healthcare providers reported high confidence in  
29  
30 communicating with autistic adult patients, or identifying and making necessary  
31  
32 accommodations.<sup>4</sup>  
33  
34  
35  
36  
37  
38  
39  
40  
41

42 This study primarily aimed to identify self-reported barriers to accessing primary health care  
43  
44 faced by autistic adults with a focus on autism-specific communication, sensory issues and  
45  
46 procedural considerations. Secondary aims included capturing self-reported adverse health  
47  
48 outcomes and the associations between these and reported healthcare access barriers,  
49  
50 adding a narrative frame to the existing evidence base around health disparities. This is to our  
51  
52 knowledge the largest study of primary healthcare access barriers to date and benefits from  
53  
54 a high degree of participatory design by the autistic community.  
55  
56  
57  
58  
59  
60



## Methods

### *Ethical approval*

We obtained ethical approval from SJH/TUH Research Ethics Committee, Tallaght University Hospital, Dublin.

### *Conception and design*

Here, we present part of a larger cross-sectional study. This work was inspired by a quality improvement project designed to inform autism training for local healthcare providers as part of an “Autism Friendly Town” initiative by AsIAM, Ireland’s National Autism Charity.<sup>23,24</sup> In 2018, MD attended *Autscape*,<sup>25</sup> an annual conference by and for autistic people. Participants of all ages are welcome at *Autscape*, including those who are non-speaking, have high support needs or require full-time care, although the majority of attendees typically have low to moderate support needs. Whilst there, MD distributed a qualitative questionnaire entitled “What do you wish your GP knew about autism?” MD reviewed the 75 responses and grouped these under broad themes. That project formed the inspiration and basis for the study reported in this paper. Using the data gathered at *Autscape*, MD developed an online survey to investigate barriers to primary healthcare in a larger sample of autistic adults, compared with a non-autistic adult comparison group. Nine autistic adults assisted with refining the survey. The resulting survey contained a mix of quantitative questions and free comment boxes. Quantitative questions included yes-no responses, single- and multiple-item selections from a list, and Likert scales. We asked about specific barriers encountered accessing healthcare, reasons for delaying or avoiding a visit, and difficulties booking, planning or waiting for a GP visit. We explored the challenges during a consultation, including

1  
2  
3 communication, sensory and organisation issues as well as available social supports. We also  
4  
5 explored the impact of such barriers including self-reported consequences of failure to access  
6  
7 healthcare and the reasonable adjustments to standard care which facilitate access. We used  
8  
9 Google Forms to host the survey.  
10  
11  
12  
13  
14

### 15 *Piloting and refinement*

16  
17 We piloted the survey in 2018. Preliminary analysis revealed a recurring theme of total non-  
18  
19 engagement with healthcare providers, despite expressed healthcare needs. Consequently,  
20  
21 we altered the survey to add response options applicable to non-attenders. Our research  
22  
23 team, comprising autistic and non-autistic GPs, experienced academics, and other autistic  
24  
25 individuals, adapted and refined the survey into its final 52-item form.  
26  
27  
28  
29  
30  
31

### 32 *Sampling, recruitment and data collection*

33  
34 Autistic adults were recruited using a convenience sampling approach, through Twitter,  
35  
36 Facebook and the AsIAm website. We recruited non-autistic controls (without autistic  
37  
38 children) through personal and professional contacts of research team members, local area  
39  
40 groups and parenting groups on social media. Recruitment took place in August 2019. We  
41  
42 provided participant information, with informed consent implied through subsequent  
43  
44 completion of the questionnaire. We asked respondents, particularly those who were  
45  
46 parents, to respond specifically about seeking healthcare for themselves. For those  
47  
48 identifying as autistic, we asked if they were formally diagnosed or self-identified.  
49  
50  
51  
52  
53  
54  
55

### 56 *Data analysis*

We used the statistical package 'R' to assess significance of between-group associations using a test of proportions and a Wilcoxon-Mann-Whitney U test. Participants who skipped questions were omitted from the analyses of those questions. We intend to present our qualitative results elsewhere.

### *Patient and Public involvement*

Our study was conducted by an autistic-led research team including autistic medical doctors, using participatory methods. In addition, nine autistic individuals assisted with developing and refining the survey into its final form.

## Results

### *Participants*

We are reporting 664 responses to the online survey: 507 autistic adults and 157 non-autistic adults (Table 1). Unless otherwise specified, results relate to primary care.

Table 1. Participant Data

|                   | Autistic     | Non-autistic |
|-------------------|--------------|--------------|
| Participants (n)  | 507          | 157          |
| <u>Age</u>        |              |              |
| Median (Range)    | 38 (17 - 73) | 38 (18 - 70) |
| <u>Gender</u>     |              |              |
| Male              | 99 (20%)     | 16 (10%)     |
| Female            | 311 (62%)    | 132 (85%)    |
| Non-binary        | 83 (17%)     | 7 (5%)       |
| Prefer not to say | 9 (2%)       | 1 (1%)       |

|                                   |             |          |
|-----------------------------------|-------------|----------|
|                                   |             |          |
| <u>Location</u>                   |             |          |
| UK                                | 330 (65%)   | 67 (43%) |
| Ireland                           | 77 (15%)    | 63 (40%) |
| North America                     | 44 (9%)     | 20 (13%) |
| Other                             | 56 (11%)    | 7 (4%)   |
|                                   |             |          |
| <u>Formal diagnosis of autism</u> | 77%         |          |
| By psychiatrist                   | 25%         |          |
| By clinical psychologist          | 48%         |          |
| By multidisciplinary team         | 26%         |          |
|                                   |             |          |
| <u>Age at diagnosis</u>           |             |          |
| Median (Range)                    | 33 (2 - 67) |          |

### *Barriers to access*

The most common reason for a GP visit was a physical condition or illness in both groups (86% vs 92%, n.s.). Autistic individuals were more likely to attend for mental health difficulties (61% vs 27%, difference 34%, 95%CI[25.2%,42.3%],  $p<0.001$ ). Twenty-two percent of the autistic respondents usually attended for issues directly related to autism. Compared to 37% of non-autistic respondents, 80% of autistic respondents reported difficulty visiting a GP when needed (difference 43%, 95%CI[34.4%,51.9%],  $p<0.001$ ). While difficulty deciding if symptoms warrant a visit was a barrier for both groups (72% vs 65%, n.s.), the most notable difference related to difficulties using the telephone to book an appointment (62% vs 16%). Not feeling understood was a reason to avoid or delay for 56% of autistic respondents compared to 13% of non-autistic respondents. Difficulty communicating with the doctor during the appointment was a barrier for 53% of the autistic group but only 6% of non-autistic respondents. See Supplementary Table 1 for specific barriers in order of frequency.

### *Communication*

Alongside difficulty using the telephone, not feeling understood and difficulty communicating with the doctor, autistic respondents reported difficulty communicating with reception staff more often than non-autistic respondents (46% vs 8%, difference 38%, 95%CI[31.5%,44.6%],  $p<0.001$ ). Fifty nine percent of autistic respondents reported difficulty communicating during a consultation “all the time” or “frequently” compared to 12% of non-autistic respondents ( $p<0.001$ ). Seventy eight percent of autistic adults reported that “anxiety makes it harder to communicate.”

Autistic respondents reported avoiding the telephone (78%), voicemail (61%) and face-to-face verbal communication (30%). Forty one percent reported that it is “easier for me to communicate in writing” (Table 2).

Table 2 Communication Barriers

| <b>Reasons to avoid or delay GP visit (Communication)</b>           | Autistic n (%) | Non-autistic n (%) | Difference (95% Confidence Interval) | p value   |
|---------------------------------------------------------------------|----------------|--------------------|--------------------------------------|-----------|
| Difficulty using the telephone to book an appointment               | 314 (62%)      | 25 (16%)           | 46% (CI 38.5%,53.5%)                 | $p<0.001$ |
| Not feeling understood                                              | 283 (56%)      | 21 (13%)           | 42% (CI 35.2%,49.7%)                 | $p<0.001$ |
| Difficulty communicating with the doctor during the appointment     | 269 (53%)      | 10 (6%)            | 47% (CI 40.5%,52.9%)                 | $p<0.001$ |
| Difficulty communicating with the reception staff                   | 235 (46%)      | 13 (8%)            | 38% (CI 31.5%,44.6%)                 | $p<0.001$ |
| <b>Communication preferences</b>                                    |                |                    |                                      |           |
| Telephone generally avoided where possible                          | 395 (78%)      | 59 (38%)           | 40% (CI 31.5%,49.1%)                 | $p<0.001$ |
| Voicemail generally avoided where possible                          | 311 (61%)      | 61 (39%)           | 23% (CI 13.3%,31.6%)                 | $p<0.001$ |
| Verbal, face-to-face communication generally avoided where possible | 152 (30%)      | 12 (8%)            | 22% (CI 16.2%,28.5%)                 | $p<0.001$ |

|                                                                                    |           |          |                         |         |
|------------------------------------------------------------------------------------|-----------|----------|-------------------------|---------|
| It is easier for me to communicate in writing                                      | 208 (41%) | 13 (8%)  | 33% (CI 26.3%,39.2%)    | p<0.001 |
| <b><u>Communication challenges</u></b>                                             |           |          |                         |         |
| Anxiety makes it harder to communicate                                             | 395 (78%) | 42 (23%) | 51% (CI 42.9%,59.4%)    | p<0.001 |
| Sensory issues make communication more difficult                                   | 156 (31%) | 2 (1%)   | 30% (CI 24.7%,34.3%)    | p<0.001 |
| I need extra time to process what is being said                                    | 286 (56%) | 12 (8%)  | 49% (CI 42.4%,55.2%)    | p<0.001 |
| I can't describe my pain or symptoms accurately                                    | 272 (54%) | 36 (23%) | 31% (CI 22.4%,39.0%)    | p<0.001 |
| Verbal communication is difficult                                                  | 234 (46%) | 11 (7%)  | 39% (CI 32.8%,45.5%)    | p<0.001 |
| I express emotions differently e.g. I can appear angry when I am afraid or in pain | 227 (45%) | 6 (4%)   | 41% (CI 35.3%,46.6%)    | p<0.001 |
| I have difficulty prioritising when describing medical symptoms                    | 333 (66%) | 34 (22%) | 44% (CI 36.0%,52.1%)    | p<0.001 |
| I need to give the whole story and not leave anything out                          | 332 (66%) | 18 (12%) | 54% (CI 47.1%,60.9%)    | p<0.001 |
| None of the above (Communication)                                                  | 11 (2%)   | 58 (37%) | -35% (CI -42.8%,-26.7%) | p<0.001 |

### *Sensory processing*

The waiting room environment was a barrier for 51% of autistic respondents, but only 8% of non-autistic respondents. Specific sensory barriers are detailed in Table 3. Sensory issues made communication more difficult for 31% of the autistic group (See Table 2). Only 10% of autistic respondents marked “none of the above” to sensory questions compared to 71% of non-autistic respondents.

**Table 3: Sensory Barriers**

| <b><u>Reasons to avoid or delay GP visit (Sensory)</u></b> | <b>Autistic n (%)</b> | <b>Non-autistic n (%)</b> | <b>Difference (95% Confidence Interval)</b> | <b>p value</b> |
|------------------------------------------------------------|-----------------------|---------------------------|---------------------------------------------|----------------|
| The waiting room environment                               | 256 (51%)             | 12 (8%)                   | 42.8% (CI 36.4%,49.3%)                      | p<0.001        |

| <b><u>Specific sensory challenges</u></b>     | <b>Autistic n (%)</b> | <b>Non-autistic n (%)</b> | <b>Difference (95% Confidence Interval)</b> | <b>p value</b> |
|-----------------------------------------------|-----------------------|---------------------------|---------------------------------------------|----------------|
| Noise in the waiting room from other patients | 319 (63%)             | 19 (12%)                  | 51% (CI 43.8%,57.8%)                        | p<0.001        |
| Crowded waiting area                          | 299 (59%)             | 22 (14%)                  | 45% (CI 37.6%,52.3%)                        | p<0.001        |
| Bright or fluorescent lights                  | 268 (53%)             | 14 (9%)                   | 44% (CI 37.3%,50.6%)                        | p<0.001        |
| Uncomfortable furniture                       | 195 (39%)             | 11 (7%)                   | 32% (CI 25.2%,37.7%)                        | p<0.001        |
| Unexpected touch                              | 193 (38%)             | 9 (6%)                    | 32% (CI 26.3%,38.3%)                        | p<0.001        |
| Music playing in the waiting room             | 172 (34%)             | 9 (6%)                    | 28% (CI 22.3%,34.1%)                        | p<0.001        |
| Smells in the waiting room                    | 171 (34%)             | 8 (5%)                    | 29% (CI 22.9%,34.4%)                        | p<0.001        |
| Touch during examination                      | 160 (32%)             | 11 (7%)                   | 25% (CI 18.5%,30.7%)                        | p<0.001        |
| Noise from the reception desk                 | 140 (28%)             | 4 (3%)                    | 25% (CI 20.0%,30.1%)                        | p<0.001        |
| Smells in the doctor's office                 | 104 (21%)             | 6 (4%)                    | 17% (CI 11.7%,21.7%)                        | p<0.001        |
| None of the above (Sensory)                   | 51 (10%)              | 112 (71%)                 | -61% (CI -69.2%,-53.3%)                     | p<0.001        |

### *Perceived Stigma*

Only 3% of autistic respondents stated they did not feel anxious going to the doctor, compared to 33% of non-autistic respondents (difference 30%, 95%CI[-37.7%,-21.8%] p<0.001). Autistic respondents reported being “concerned I won’t be taken seriously when I describe my symptoms” (67%); worried about “wasting the doctor’s time” (66%) and “being considered a hypochondriac” (65%). They also reported difficulty “asking for help” (63%) and “discussing mental health” (59%). Autistic respondents reported that unusual behaviour or stimming elicited negative reactions from other patients (15%) reception staff (9%) or medical staff (7%) (Supplementary Table 2).

### *Planning and Organising*

Autistic respondents reported difficulties with summarising when describing medical problems, with 66% noting the “need to give the whole story and not leave anything out” compared to 12% of non-autistic respondents (difference 54%, 95%CI[47.1%,60.9%],  $p<0.001$ ). Autistic respondents reported difficulties with organisation and planning for healthcare, including difficulties “making an appointment in advance” (59%), “prioritising my health issues” (58%) and “making changes to my lifestyle or habits” (56%). Forty five percent reported forgetting a medical appointment and 30% had attended on the wrong day. (Supplementary Table 3).

### *Predictability and control*

Autistic respondents reported more difficulty with uncertainty than non-autistic respondents. Particular difficulties included not knowing the wait duration (70% vs 30%, difference 40%, 95%CI[31.5%,48.7%],  $p<0.001$ ), what would happen during the consultation (63% vs 16%, difference 47%, 95%CI[39.7%,54.7%],  $p<0.001$ ), which doctor they would see (58% vs 24%, difference 33%, 95%CI[25.0%,41.8%],  $p<0.001$ ) and the consultation length (40% vs 8%, difference 32%, 95%CI[25.6%,38.4%]  $p<0.001$ ).

### *Support needs*

Autistic adults reported physical mobility needs (16%), and unmet support needs in primary care e.g. “needing a support person to come with me” (21%). This extended to secondary



1  
2  
3 care: 17% had no one to support unexpected hospital admission, collection from hospital  
4  
5 (20%), or home care following discharge (26%). (Supplementary Table 4).  
6  
7  
8  
9

### 10 *Adverse consequences*

11  
12 Autistic respondents reported adverse consequences more frequently than non-autistic  
13 respondents, including untreated mental (69%) and physical (63%) health conditions. Notably  
14  
15 60% were told they “should have seen a doctor sooner” and 47% “did not attend referral to  
16  
17 a specialist”. Thirty-six percent “required more extensive treatment or surgery” and 34% did  
18  
19 not access treatment for a “potentially serious or life threatening condition”. Additionally,  
20  
21 they were less likely to “attend on schedule for screening programmes” than the non-autistic  
22  
23 respondents (39% vs 21%, difference 18%, 95%CI[9.8%,26.2%],  $p<0.001$ ) (Figure 1).  
24  
25  
26  
27  
28  
29  
30  
31  
32

33 [FIGURE 1 GOES HERE]  
34  
35  
36  
37

38 Compared to autistic respondents who had no difficulty visiting a doctor, those who  
39  
40 experienced difficulty (80%) reported more untreated mental and physical health conditions  
41  
42 ( $p<0.001$ ). They were also more likely to not attend specialist referral ( $p<0.001$ ), to need  
43  
44 more extensive treatment ( $p=0.009$ ), to experience untreated life-threatening conditions  
45  
46 ( $p=0.006$ ) and to not attend screening ( $p=0.028$ ) (Figure 2). Four percent of autistic  
47  
48 respondents reported no access to primary healthcare and did not attend any doctor at all.  
49  
50 This group differed from the non-autistic respondents who reported no access to primary  
51  
52 healthcare (5%) in two areas: all had difficulty visiting the doctor when needed, compared to  
53  
54 50% of non-attending non-autistic respondents ( $p=0.002$ ); and 95% of autistic non-attenders  
55  
56 had experienced at least one delayed treatment outcome, compared to 43% of non-  
57  
58  
59  
60

1  
2  
3 attending, non-autistic respondents ( $p=0.01$ ). There were no significant differences in  
4  
5 difficulty attending, barriers experienced or adverse outcomes between formally diagnosed  
6  
7 and self-identified autistic respondents.  
8  
9

10  
11  
12 [FIGURE 2 GOES HERE]  
13  
14  
15

### 16 17 *Facilitators*

18  
19 While most respondents (67% vs 65%) reported booking an appointment online would  
20  
21 facilitate access, autistic patients selected a need to “email my doctor in advance with a  
22  
23 description of the issue I need to discuss” (62%), “wait in a quiet place or outside until my  
24  
25 turn” (56%), and “book an appointment by text” (41%). Some autistic individuals would  
26  
27 benefit if they “could book the first or last appointment” (41%) or had a “sensory box available  
28  
29 in the waiting room” (16%) (Supplementary Table 5).  
30  
31  
32  
33  
34  
35

36  
37 Despite the outlined difficulties of visiting their doctor, autistic individuals felt their  
38  
39 relationship with their GP was “very important” or “important” significantly more than non-  
40  
41 autistic respondents (70% vs. 56%,  $p=0.001$ ), but only 33% of autistic respondents reported a  
42  
43 good relationship with their doctor ( $p<0.001$ ). Only 62% of autistic individuals reported that  
44  
45 their doctor knew they were autistic. Twenty two percent were unsure whereas 16% hadn’t  
46  
47 disclosed their diagnosis. Autistic respondents appreciated GPs who ask direct questions, give  
48  
49 clear explanations, are honest about not understanding autism but know that autism isn’t a  
50  
51 mental illness.  
52  
53  
54  
55  
56  
57  
58  
59  
60

### *Geographical variations*

Some barriers to access for autistic respondents varied by geographical location (UK vs elsewhere in the world). Autistic respondents from the UK had more difficulty using the telephone to book appointments (66% vs 54%,  $p=0.012$ ), more difficulty communicating with reception staff (52% vs 37%,  $p=0.002$ ), and were less likely to experience no barriers to access at all (0.3% vs 2.8%,  $p=0.038$ ). Autistic respondents from the UK also found it harder to see a known or preferred doctor (58% vs 29%,  $p<0.001$ ), reported longer waits to get appointments (59% vs 33%,  $p<0.01$ ), and found their online appointment booking systems more confusing (26% vs 10%,  $p<0.001$ ). However, they were less likely to report no access to online booking systems compared to those from elsewhere in the world (26% vs 42%,  $p<0.001$ ). There were no other significant differences for autistic respondents by geographical location.

There was only one significant geographical variation in self-reported adverse outcomes. For autistic respondents, those in the UK were less likely than those from elsewhere in the world to miss / not attend specialist referrals (43% vs 55%,  $p=0.019$ ).

### *Associations between barriers and outcomes for autistic respondents*

**Table 4: Barriers and Outcomes Associations for Autistic Respondents**

|  | Untreated mental health condition | Untreated physical health condition | Specialist referral missed | Told they should have presented sooner | More extensive treatment or surgery required | Serious or life threatening condition |
|--|-----------------------------------|-------------------------------------|----------------------------|----------------------------------------|----------------------------------------------|---------------------------------------|
|  |                                   |                                     |                            |                                        |                                              |                                       |

|                                                                 |                   |                   |                   |                   |                   |                |
|-----------------------------------------------------------------|-------------------|-------------------|-------------------|-------------------|-------------------|----------------|
| Difficulty using the telephone to book an appointment           | <b>p&lt;0.001</b> | <b>p&lt;0.001</b> | <b>p=0.036</b>    | <b>p=0.015</b>    | n.s.              | <b>p=0.007</b> |
| Difficulty with advance planning                                | <b>p=0.020</b>    | <b>p=0.032</b>    | <b>p&lt;0.001</b> | <b>p=0.030</b>    | n.s.              | n.s.           |
| Difficulty communicating with reception staff                   | <b>p&lt;0.001</b> | <b>p&lt;0.001</b> | <b>p=0.008</b>    | <b>p&lt;0.001</b> | <b>p=0.041</b>    | <b>p=0.004</b> |
| Difficulty communicating with the doctor during the appointment | <b>p&lt;0.001</b> | <b>p&lt;0.001</b> | <b>p&lt;0.001</b> | <b>p=0.003</b>    | <b>p=0.003</b>    | <b>p=0.002</b> |
| The waiting room environment                                    | <b>p=0.007</b>    | <b>p&lt;0.001</b> | n.s.              | <b>p=0.010</b>    | <b>p&lt;0.001</b> | n.s.           |
| Inability to see a known or preferred doctor                    | <b>p&lt;0.001</b> | <b>p=0.003</b>    | n.s.              | <b>p=0.027</b>    | n.s.              | n.s.           |
| Waiting to see the doctor is too difficult                      | <b>p=0.018</b>    | <b>p=0.001</b>    | n.s.              | n.s.              | <b>p=0.026</b>    | n.s.           |
| Not feeling understood                                          | <b>p&lt;0.001</b> | <b>p&lt;0.001</b> | <b>p&lt;0.001</b> | n.s.              | n.s.              | <b>p=0.026</b> |
| Needing a support person to come with me                        | n.s.              | <b>p=0.002</b>    | <b>p=0.004</b>    | n.s.              | <b>p=0.009</b>    | <b>p=0.002</b> |

Table 4 outlines associations between reported barriers and outcomes for autistic respondents. There were no significant associations between any adverse outcomes and difficulty deciding if symptoms warrant a GP visit, not having an online booking system, having a confusing online booking system, having a long wait to get an appointment, or having enough time to visit a doctor. In contrast, difficulty communicating with reception staff and difficulty communicating with the doctor during appointments were both significantly associated with all adverse outcomes.

1  
2  
3  
4  
5  
6  
7  
8  
9  
10  
11  
12  
13  
14  
15  
16  
17  
18  
19  
20  
21  
22  
23  
24  
25  
26  
27  
28  
29  
30  
31  
32  
33  
34  
35  
36  
37  
38  
39  
40  
41  
42  
43  
44  
45  
46  
47  
48  
49  
50  
51  
52  
53  
54  
55  
56  
57  
58  
59  
60

Difficulty using the telephone to book an appointment was significantly associated with all adverse outcomes apart from having to undergo more extensive treatment or surgery than if they had attended sooner. Challenges with the waiting room environment were significantly associated with all adverse outcomes apart from missing specialist referrals and having a potentially serious or life-threatening condition for which they did not access treatment. Difficulty planning an appointment in advance was significantly associated with all adverse outcomes apart from having a potentially serious or life-threatening condition for which they did not access treatment, and having to undergo more extensive treatment or surgery than if they had attended sooner. Needing a support person to attend appointments was significantly associated with all adverse outcomes apart from having had a mental health condition remain untreated due to difficulties accessing healthcare and being told they should have presented sooner. Not feeling understood was significantly associated with all adverse outcomes apart from being told they should have presented sooner and having to undergo more extensive treatment or surgery than if they had attended sooner. Needing a support person to attend with them was significantly associated with all adverse outcomes apart from having untreated mental health conditions and being told they should have presented sooner.

The inability to see a known or preferred doctor was significantly associated with having both untreated mental and physical health conditions. It was also significantly associated with being told they should have presented sooner. Finding waiting to see a doctor too difficult was significantly associated with having both untreated mental and physical health

1  
2  
3 conditions. It was also significantly associated with having to undergo more extensive  
4  
5 treatment or surgery than if they had attended sooner.  
6  
7  
8  
9

10  
11 Reporting no barriers to access healthcare had no significant associations with any of the  
12  
13 adverse outcomes.  
14  
15  
16

## 17 18 19 20 21 **Discussion**

22  
23  
24 Our study describes the results of a survey of autistic adults and compares their experiences  
25  
26 with non-autistic adults. It highlights barriers faced by autistic people accessing and engaging  
27  
28 with primary healthcare. In our study these included greater difficulties deciding when to seek  
29  
30 care, reluctance to bother their GP, difficulties planning appointments and greater  
31  
32 communication difficulties – with particular emphasis on telephone use. Communication was  
33  
34 also impaired by anxiety and sensory issues. We linked those barriers to self-reported adverse  
35  
36 outcomes. Our data indicated that autistic people may present for healthcare later in the  
37  
38 natural course of an illness. Autistic participants reported reduced attendance for screening,  
39  
40 late presentations, missed opportunities for early detection and more extensive therapy  
41  
42 being required. They also delayed or avoided healthcare because they didn't feel understood  
43  
44 by their doctors. Furthermore, a substantial minority of autistic adults did not disclose their  
45  
46 autism diagnosis which may impede identification of their autism-specific needs. These  
47  
48 barriers may have real consequences, as evidenced in reduced life expectancy, and higher  
49  
50 levels of physical and mental health conditions amongst autistic people.  
51  
52  
53  
54  
55  
56  
57  
58  
59  
60

### *Comparison with existing literature*

This study confirms the findings of Nicolaidis,<sup>14</sup> Raymaker<sup>16</sup> and several recent reviews<sup>15,17,26</sup>, which all identified three groups of barriers: (1) patient-level factors; (2) provider-level factors; and (3) system-level factors. Our study stratifies individual barriers from the perspective of autistic individuals. We couple these barriers to self-reported adverse consequences, highlighting factors which may lead to excess morbidity and mortality in the autistic population.

### *Strengths and limitations*

Our study arose from a community-identified need to develop autism awareness training for healthcare providers. It benefited from an autistic-led research team including autistic doctors, using participatory methods. Our study provided a unique picture of autistic adults' healthcare experiences, including those entirely excluded from healthcare due to access barriers. In particular, we highlighted the difficulties with using the telephone which is a distilled, concentrated essence of verbal communication.

As we used a convenience sample and self-report survey, generalisability of the data may be limited. Respondents required the ability to complete the survey which excluded those with reduced ability to self-report. Whilst we did not set out to create a validated tool, our survey may have benefited from some validity and reliability testing. As the initial quality improvement questionnaire was undertaken in the United Kingdom, we did not include issues specific to other healthcare systems, such as cost or insurance. Our analyses did not account for potential confounding factors, such as ethnicity or socio-economic status. Female participants were over-represented in both groups which is not unusual for online surveys,

1  
2  
3 but is interesting given the higher rate of autism diagnosis in males. Whilst we noted  
4  
5 significant gender differences in relation to non-binary participants, these participants were  
6  
7 almost all autistic and we were therefore unable to attribute differences to gender identity  
8  
9 or autism with any degree of certainty. Furthermore, as this is a cross-sectional study, whilst  
10  
11 we can identify associations, we cannot confirm causality.  
12  
13  
14  
15  
16  
17

### 18 *Implications for Research*

19  
20 Our study suggests a need for personalised approaches to healthcare access. A prior study  
21  
22 investigated using a pre-visit telephone call to identify individualised accommodations.<sup>27</sup> Our  
23  
24 data suggest that this could be problematic for autistic adults. The AASPIRE Healthcare  
25  
26 Toolkit<sup>28</sup> includes a publicly available online program which generates a computerised report  
27  
28 of required healthcare accommodations. Adaptation of such a toolkit in NHS General Practice  
29  
30 should be considered and researched. Social care interventions and healthcare facilitators in  
31  
32 general practice have shown benefit with a vulnerable population,<sup>29</sup> similar approaches could  
33  
34 benefit an autistic population. The significant difficulties amongst the small number of autistic  
35  
36 people not registered with any GP indicate a need for further research into this group.  
37  
38  
39  
40  
41  
42  
43  
44

### 45 *Implications for Clinical Practice*

46  
47 Based on supplementary table 5 and the lived experience of the autistic members of our  
48  
49 research team, Figure 3 outlines our proposed elements of an autism friendly practice. Such  
50  
51 adjustments may minimise anxiety, manage sensory issues, and ensure mutual understanding  
52  
53 – promoting clear, unambiguous communication. Autism friendly practices should employ a  
54  
55 personalised approach, with a healthcare access needs assessment and, where possible, a  
56  
57 specialist liaison nurse or facilitator.  
58  
59  
60



### *Implications for Policy*

Given the identified barriers, the extension of annual health checks to autistic adults<sup>30,31</sup> and the recently announced Oliver McGowan Mandatory Training in Learning Disability and Autism<sup>32</sup> are welcome. These will likely bring important benefits provided they are informed by the autistic community and autistic healthcare providers. Autism registers in GP practice have been recommended.<sup>33,34</sup> The success of such initiatives will likely depend on greater awareness by medical practitioners of autistic culture and communication needs. Specific training for GPs during core training and continuing professional development may be beneficial. GPs with a special interest in autism should be facilitated to develop their skills, but management of general health needs and co-occurring conditions fall within the remit of every GP. Implementing existing autism legislation or development where lacking is required in order to reduce health inequities for autistic people.

## **Conclusions**

Autistic people face barriers accessing the healthcare system, followed by difficulties interacting with healthcare providers, which may contribute to known healthcare disparities including increased morbidity and mortality. Our study has highlighted a variety of specific barriers to accessing primary healthcare for autistic adults, including use of the telephone to book appointments, not feeling understood, and difficulty communicating with doctors as well as sensory and organisational issues which impede healthcare access. We identified a variety of significant associations between self-reported barriers to healthcare access and adverse outcomes for autistic respondents. One of our most impactful findings was the lack

1  
2  
3 of any significant differences between formally diagnosed and self-identified autistic  
4 respondents in difficulty attending a GP, barriers experienced, or self-reported adverse  
5 healthcare outcomes. Progress towards eliminating healthcare disparities for autistic people  
6 may be achieved by understanding the healthcare experiences and access barriers for this  
7 vulnerable patient group. These barriers represent not so much a failure to deliver or to avail  
8 of healthcare, but a lack of intersection between the communication patterns of autistic  
9 healthcare users and non-autistic providers. Reasonable accommodations are legally<sup>35</sup> and  
10 morally required. Adjustments for communication needs are as necessary for autistic people  
11 as ramps for wheelchair users.  
12  
13  
14  
15  
16  
17  
18  
19  
20  
21  
22  
23  
24  
25  
26  
27

### **Figure legends**

28  
29  
30 Figure 1. Adverse Healthcare Outcomes

31 For all comparisons between autistic and non-autistic groups  $p < 0.001$ .

32  
33 Figure 2. Adverse outcomes according to difficulty attending a GP

34 \*\* $p < 0.001$  \* $p < 0.05$

35 Note y-axis = N  
36  
37

38 Figure 3. Autism Friendly General Practice  
39  
40  
41  
42  
43  
44

### **Author Contributions**

45 Conception and design of study: M Doherty, S Neilson, J O'Sullivan, with contributions from  
46 those listed in acknowledgements.

47 Acquisition of data: M Doherty, S Neilson, J O'Sullivan

48 Analysis of data: S Neilson, M Doherty, SCK Shaw

49 Interpretation of data: M Doherty, S Neilson, J O'Sullivan, L Carravallah, M Johnson, W Cullen,  
50 SCK Shaw

51 Drafting and revising the manuscript: M Doherty, S Neilson, J O'Sullivan, L Carravallah, M  
52 Johnson, W Cullen, SCK Shaw

53 Approval of the version of the manuscript to be published: M Doherty, S Neilson, J O'Sullivan,  
54 L Carravallah, M Johnson, W Cullen, SCK Shaw  
55  
56  
57  
58  
59  
60

1  
2  
3 **Competing interests:** None.  
4

5  
6 **Funding:** We are grateful to AsIAm, Ireland's National Autism Charity and Scally's SuperValu,  
7 Clonakilty, for the funding to enable open access publication.  
8

9 **Data availability statement:** Data are available upon reasonable request. All data relevant to  
10 this paper are included in the article or uploaded as supplementary information. Should  
11 further details or materials be required, please contact the corresponding author.  
12  
13

14  
15 **Acknowledgements:** We are indebted to Professor Louise Gallagher for her guidance during  
16 the early stages of this project. We acknowledge the input received from the autistic adult  
17 community recruited via local groups and online contacts during the development of the  
18 online survey. Assistance with content, structure and proofreading of the surveys was  
19 received from nine autistic adults in Ireland and the UK. We received assistance from  
20 members of peer support group 'Autistic Doctors International'. We also thank Dr David  
21 Hillebrandt, Dr Natalie Teasdale, Elaine McGoldrick and Karen Leneh Buckle for their  
22 assistance during this project.  
23  
24  
25  
26  
27  
28  
29  
30  
31  
32  
33  
34  
35  
36  
37  
38  
39  
40  
41  
42  
43  
44  
45  
46  
47  
48  
49  
50  
51  
52  
53  
54  
55  
56  
57  
58  
59  
60

## References

1. Data CDC. Statistics. Autism Spectrum Disorder. Resource Document. Available at: <https://www.cdc.gov/ncbddd/autism/data.html> [Last accessed on 2021 Jul 24].
2. Royal College of Psychiatrists. The psychiatric management of autism in adults (CR228). Available at: <https://www.rcpsych.ac.uk/improving-care/campaigning-for-better-mental-health-policy/college-reports/2020-college-reports/cr228> [Last Accessed 2021 Jul 24]
3. Zerbo O, Massolo ML, Qian Y, Croen LA. A study of physician knowledge and experience with autism in adults in a large integrated healthcare system. *J Autism Dev Disord.* 2015;45(12):4002-14.
4. Nicolaidis C, Schnider G, Lee J, et al. Development and psychometric testing of the AASPIRE adult autism healthcare provider self-efficacy scale. *Autism.* Aug 2020. doi:10.1177/1362361320949734
5. Rydzewska E, Hughes-McCormack LA, Gillberg C, et al. General health of adults with autism spectrum disorders—A whole country population cross-sectional study. *Res Autism Spectr Disord.* 2019;60:59-66.
6. Croen LA, Zerbo O, Qian Y, et al. The health status of adults on the autism spectrum. *Autism.* 2015;19(7):814-23.
7. Ming X, Brimacombe M, Chaaban J, Zimmerman-Bier B, Wagner GC. Autism spectrum disorders: concurrent clinical disorders. *J Child Neurol.* 2008;23(1):6-13.
8. Flygare Wallen, E., Ljunggren, G., Carlsson, A.C., Pettersson, D. and Wändell, P., 2018. High prevalence of diabetes mellitus, hypertension and obesity among persons with a recorded diagnosis of intellectual disability or autism spectrum disorder. *J Intellect Disabil Res.* 62(4), pp.269-280.
9. Hirvikoski T, Mittendorfer-Rutz E, Boman M, Larsson H, Lichtenstein P, Bölte S. Premature mortality in autism spectrum disorder. *Br J Psychiatry.* 2016;208(3):232-8.
10. Hwang YI, Srasuebku P, Foley KR, Arnold S, Trollor JN. Mortality and cause of death of Australians on the autism spectrum. *Autism Res.* 2019;12(5):806-15.
11. Bilder D, Botts EL, Smith KR, et al. Excess mortality and causes of death in autism spectrum disorders: a follow up of the 1980s Utah/UCLA autism epidemiologic study. *J Autism Dev Disord.* 2013;43(5):1196-204
12. Akobirshoev I, Mitra M, Dembo R, Lauer E. In-hospital mortality among adults with autism spectrum disorder in the United States: A retrospective analysis of US hospital discharge data. *Autism.* 2020;24(1):177-89.
13. Nicolaidis C, Raymaker D, McDonald K, et al. Comparison of healthcare experiences in autistic and non-autistic adults: a cross-sectional online survey facilitated by an academic-community partnership. *J Gen Intern Med.* 2013;28(6):761-9.
14. Vohra R, Madhavan S, Sambamoorthi U. Emergency department use among adults with autism spectrum disorders (ASD). *J Autism Dev Disord.* 2016;46(4):1441-54.
15. Walsh C, Lydon S, O'Dowd E, O'Connor P. Barriers to Healthcare for Persons with Autism: A Systematic Review of the Literature and Development of A Taxonomy. *Dev Neurorehabil.* 2020 Feb 8:1-8.
16. Raymaker DM, McDonald KE, Ashkenazy E, et al. Barriers to healthcare: Instrument development and comparison between autistic adults and adults with and without other disabilities. *Autism.* 2017;21(8):972-84
17. Mason D, Ingham B, Urbanowicz A, et al. A systematic review of what barriers and facilitators prevent and enable physical healthcare services access for autistic adults. *J Autism Dev Disord.* 2019;49(8):3387-400.
18. Vogan V, Lake JK, Tint A, Weiss JA, Lunskey Y. Tracking health care service use and the experiences of adults with autism spectrum disorder without intellectual disability: A longitudinal study of service rates, barriers and satisfaction. *Disabil Health J.* 2017;10(2):264-270.
19. Autism Act UK. Hm Government (ed). 2009. Available at: <https://www.legislation.gov.uk/ukpga/2009/15/contents>. [Last accessed on 2021 Jul 24].
20. Department of Health, 2010. "Implementing fulfilling and rewarding lives". Statutory guidance for local authorities and NHS organisation to support implementation of the autism strategy. Department of Health, London

- 1
  - 2
  - 3
  - 4
  - 5
  - 6
  - 7
  - 8
  - 9
  - 10
  - 11
  - 12
  - 13
  - 14
  - 15
  - 16
  - 17
  - 18
  - 19
  - 20
  - 21
  - 22
  - 23
  - 24
  - 25
  - 26
  - 27
  - 28
  - 29
  - 30
  - 31
  - 32
  - 33
  - 34
  - 35
  - 36
  - 37
  - 38
  - 39
  - 40
  - 41
  - 42
  - 43
  - 44
  - 45
  - 46
  - 47
  - 48
  - 49
  - 50
  - 51
  - 52
  - 53
  - 54
  - 55
  - 56
  - 57
  - 58
  - 59
  - 60
21. Buckley C. Making your practice autism friendly. *InnovAiT*. 2017;10(6):327-31.
22. Unigwe S, Buckley C, Crane L, Kenny L, Remington A, Pellicano E. GPs' confidence in caring for their patients on the autism spectrum: an online self-report study. *Br J Gen Pract*. 2017;67(659):e445-52.
23. AsIAM, 2016. A first for Ireland with Clonakilty becoming Ireland's first autism friendly town. Available at <https://asiam.ie/clonakilty-autism-friendly-town/> [Last accessed on 2021 Jul 24].
24. AsIAM, 2020. Are you ready to make your Clonakilty commitment for Autism? Available at: <https://asiam.ie/asiam-public-sector-training/autism-friendly-communities/>. [Last accessed on 2021 Jul 24].
25. The Autscope Organisation. *Autscope 2018: Exploring Inclusion*. Tonbridge, Kent: 2018. Available from: <http://www.autscope.org/2018/> [Last accessed on 2021 Jul 24].
26. Bradshaw P, Pellicano E, van Driel M, Urbanowicz A. How can we support the healthcare needs of autistic adults without intellectual disability?. *Curr Dev Disord Rep*. 2019;6(2):45-56
27. Saqr Y, Braun E, Porter K, Barnette D, Hanks C. Addressing medical needs of adolescents and adults with autism spectrum disorders in a primary care setting. *Autism*. 2018;22(1):51-61.
28. Nicolaidis C, Raymaker D, McDonald K, et al. The development and evaluation of an online healthcare toolkit for autistic adults and their primary care providers. *J Gen Intern Med*. 2016;31(10):1180-9.
29. Abel J, Kingston H, Scally A, et al. Reducing emergency hospital admissions: a population health complex intervention of an enhanced model of primary care and compassionate communities. *Br J Gen Pract*. 2018;68(676):e803-10.
30. National Institute for Health and Care Excellence. Long term plan. [London]: 2019. Chapter 3, Learning Disability and Autism. Available at: <https://www.longtermplan.nhs.uk/online-version/chapter-3-further-progress-on-care-quality-and-outcomes/a-strong-start-in-life-for-children-and-young-people/learning-disability-and-autism/> [Last accessed on 2021 Jul 24].
31. Harper G, Smith E, Parr J, et al. Autistica action briefing: health checks. Available at: <https://www.autistica.org.uk/downloads/files/Autistica-Action-Briefing-Health-Checks.pdf>. [Last accessed on 2021 Jul 24].
32. Health Education England. Partners announced to deliver the Oliver McGowan Mandatory Learning Disability and Autism training for all health and social care staff. Health Education England, 2020, <https://www.hee.nhs.uk/news-blogs-events/news/partners-announced-deliver-oliver-mcgowan-mandatory-learning-disability-autism-training-all-health> [Last accessed on 2021 Jul 24].
33. National Institute for Health and Care Excellence. The practice establishes and maintains a register of all patients with a diagnosis of autism. [London]: 2017. ([NM153]). Available at: <https://www.nice.org.uk/standards-and-indicators/qofindicators/the-practice-establishes-and-maintains-a-register-of-all-patients-with-a-diagnosis-of-autism> [Last accessed on 2021 Jul 24].
34. Westminster Commission on Autism. A Spectrum of Obstacles An Inquiry into Access to Healthcare for Autistic People. Available at [https://westminsterautismcommission.files.wordpress.com/2016/03/ar1011\\_ncg-autism-report-july-2016.pdf](https://westminsterautismcommission.files.wordpress.com/2016/03/ar1011_ncg-autism-report-july-2016.pdf) [Last accessed on 2021 Jul 24].
35. Great Britain. Equality Act 2010. London: Stationary Office; 2010.

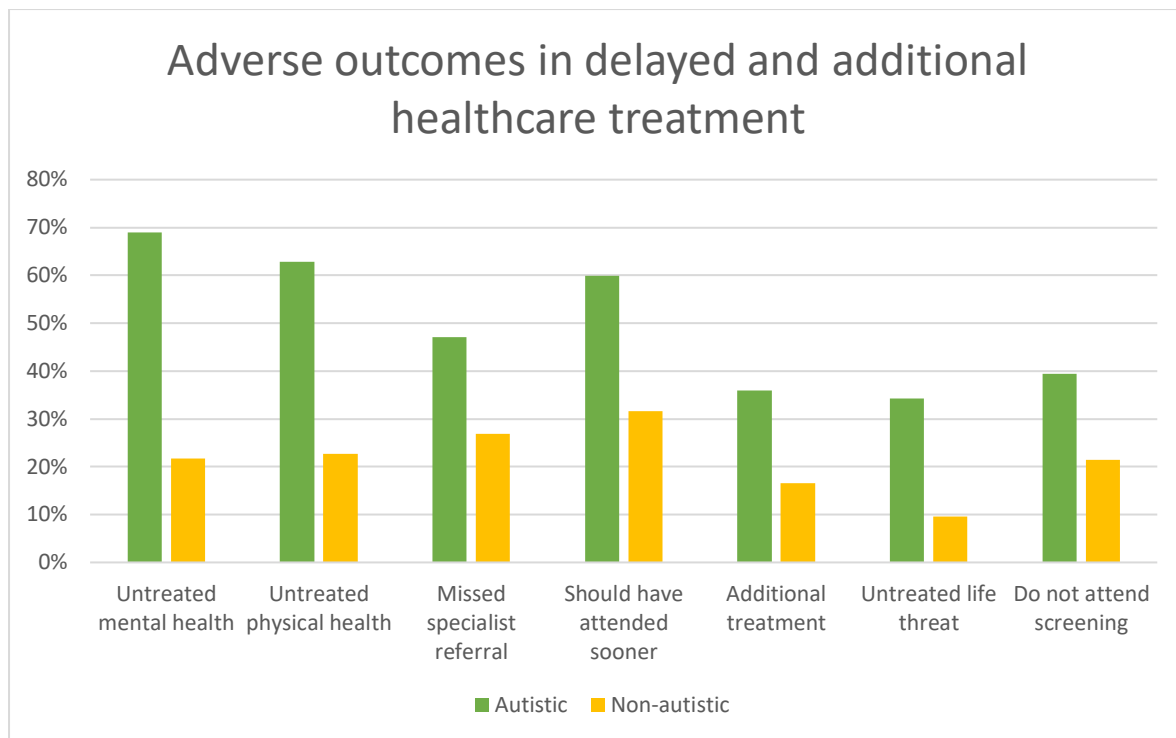

Figure 1. Adverse Healthcare Outcomes  
 For all comparisons between autistic and non-autistic groups  $p < 0.001$ .

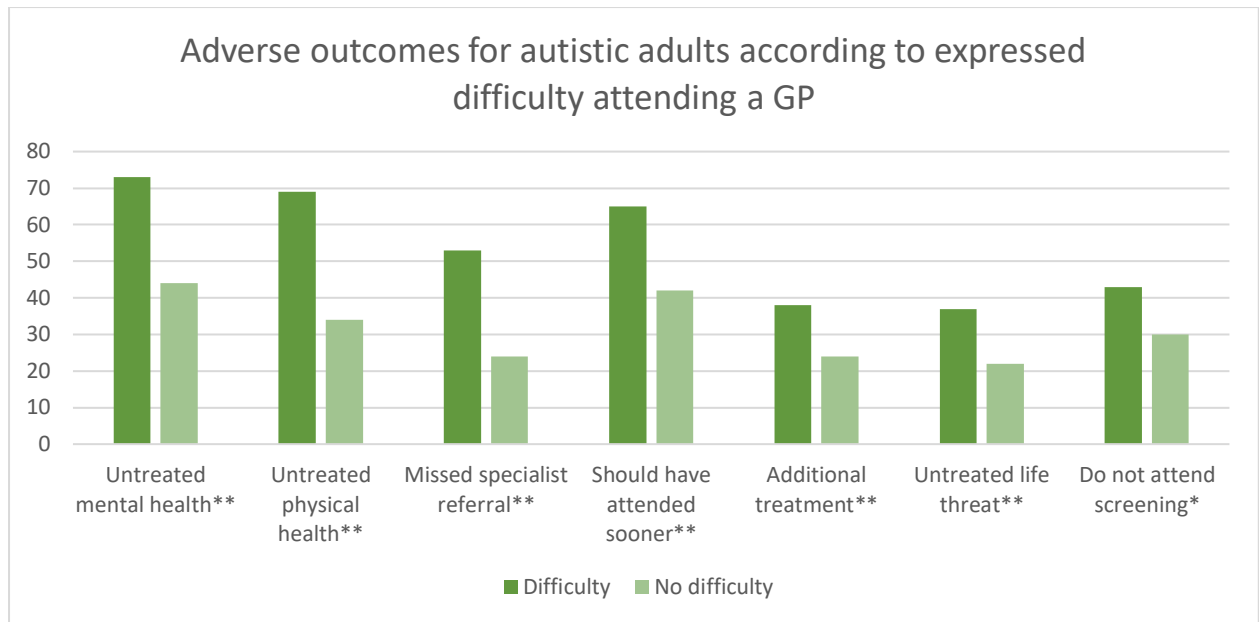

Figure 2. Adverse outcomes according to difficulty attending a GP

\*\*p<0.001 \*p<0.05

Note y-axis = N

1  
2  
3  
4  
5  
6  
7  
8  
9  
10  
11  
12  
13  
14  
15  
16  
17  
18  
19  
20  
21  
22  
23  
24  
25  
26  
27  
28  
29  
30  
31  
32  
33  
34  
35  
36  
37  
38  
39  
40  
41  
42  
43  
44  
45  
46  
47  
48  
49  
50  
51  
52  
53  
54  
55  
56  
57  
58  
59  
60



## Supplement 1

### Barriers to accessing healthcare for autistic adults: online survey

1  
2  
3  
4  
5  
6  
7  
8  
9  
10  
11  
12  
13  
14  
15  
16  
17  
18  
19  
20  
21  
22  
23  
24  
25  
26  
27  
28  
29  
30  
31  
32  
33  
34  
35  
36  
37  
38  
39  
40  
41  
42  
43  
44  
45  
46  
47  
48  
49  
50  
51  
52  
53  
54  
55  
56  
57  
58  
59  
60

1. Are you autistic?

Includes Autism, Autistic Spectrum Conditions, Asperger Syndrome, self-diagnosed or formally diagnosed.

Yes

No

2. Do you usually attend the same medical practice?

Yes

No

I don't attend any medical practice

3. Do you usually see the same doctor?

Yes

No

I don't attend any doctor

4. Do you have difficulty visiting your doctor when you need to?

Yes

No

5. Which of the following would cause you to delay or avoid seeing your doctor when you need to?

Please check ALL THAT APPLY

Difficulty deciding if symptoms warrant a GP visit

Difficulty using the telephone to book appointment

No online booking system

There is an online booking system but it's confusing

Difficulty planning an appointment in advance

Difficulty communicating with the reception staff

Difficulty communicating with the doctor during the appointment

The waiting room environment

Inability to see a known or preferred doctor

Long wait to get an appointment

Waiting to see the doctor is too difficult

Not feeling understood

Not having enough time to visit the doctor

Needing a support person to come with me

Not having anyone to look after my child

None of the above

6. Which of the following is the most difficult part of booking an appointment?

Please choose the one issue which is MOST DIFFICULT for you

- 1  
2  
3  Using the telephone to book an appointment  
4  No online booking system  
5  There is an online booking system but it's confusing  
6  None of the above  
7  
8

9 7. Which of the following is the most difficult part of planning a visit?

10 Please choose the one issue which is MOST DIFFICULT for you

- 11  Deciding if your symptoms warrant a GP visit  
12  Long wait to get an appointment  
13  Planning an appointment in advance  
14  Inability to see a known or preferred doctor  
15  Not having enough time to visit the doctor  
16  Arranging for someone to come with me  
17  If you are a parent, not having anyone to look after your child  
18  None of the above  
19  
20  
21  
22

23 8. Which of the following is most difficult during an appointment?

24 Please choose the one issue which is MOST DIFFICULT for you

- 25  Communicating with the reception staff  
26  Communicating with the doctor during the appointment  
27  The waiting room environment  
28  Not feeling understood  
29  Waiting to see the doctor is difficult  
30  None of the above  
31  
32  
33

34 9. Do you visit your doctor...

35 Check ALL THAT APPLY

- 36  Alone, by choice  
37  Alone, but would prefer to have a support person  
38  With a parent, partner or support person  
39  With a parent, partner or support person but I would prefer to go alone  
40  With a support animal  
41  To support an autistic adult  
42  As a parent with my child  
43  
44  
45

46 10. Why do you usually visit your doctor?

47 Check ALL THAT APPLY

- 48  Physical condition or illness  
49  Mental health difficulties  
50  Issues directly related to autism  
51  Other  
52  
53  
54

55 11. How much do you value your relationship with your GP?

- 56  It is very important to me  
57  It is important to me  
58  It is neither important nor unimportant to me  
59  It is not very important to me  
60

It is not at all important to me

12. Do you have a good relationship with your doctor?

Yes

Sometimes

No

Not currently, but had good relationship with GP in past

13. Do you find it difficult to communicate during a consultation?

All the time

Frequently

Sometimes

Rarely

Not at all

14. Which of the following communication issues cause you problems during a consultation?

Check ALL THAT APPLY

Verbal communication is difficult

Sensory issues make it harder to communicate

Anxiety makes it harder to communicate

It is easier for me to communicate in writing

I'm scared of the receptionist

I have difficulty asking for help

I have difficulty prioritising my health issues

I am concerned I might be labelled a hypochondriac or malingerer

Vague or open ended questions are difficult

I can't describe my pain or symptoms accurately

I express emotions differently (e.g. I can appear to be angry when I am afraid or in pain)

I need extra time to process what is being said

I am concerned I won't be taken seriously when I describe my symptoms

None of the above

Other

15. Which communication issue causes you the MOST problems during a consultation?

Please choose the one issue which is MOST DIFFICULT for you

Verbal communication is difficult

Sensory issues make it harder to communicate

Anxiety makes it harder to communicate

It is easier for me to communicate in writing

I'm scared of the receptionist

I have difficulty asking for help

I have difficulty prioritising my health issues

I am concerned I might be labelled a hypochondriac or malingerer

Vague or open ended questions are difficult

I can't describe my pain or symptoms accurately

I express emotions differently (e.g. I can appear to be angry when I am afraid or in pain)

I need extra time to process what is being said

- 1  
2  
3  I am concerned I won't be taken seriously when I describe my symptoms  
4  None of the above  
5  Other  
6  
7

8 16. Is stimming a problem for you at the doctors' office?

9 Check ALL THAT APPLY

- 10  My unusual behaviours or stimming elicit negative reactions from other patients  
11  My unusual behaviours or stimming elicit negative reactions from reception staff  
12  My unusual behaviours or stimming elicit negative reactions from medical staff  
13  I feel comfortable stimming at the doctors' office  
14  I do not feel comfortable stimming at the doctors' office  
15  I don't feel a need to stim at the doctors' office  
16  I don't understand the term "stimming"  
17  
18  
19

20 17. Do you experience any of the following?

21 Check ALL THAT APPLY

- 22  I find it difficult to make appointments in advance  
23  I have turned up for a medical appointment on the wrong day  
24  I have forgotten to attend a medical appointment  
25  I find it difficult to prioritise when describing my medical problems  
26  I need to give the whole story and not leave anything out  
27  I have forgotten why I made the appointment  
28  I find waiting difficult  
29  It is difficult to arrange someone to come with me  
30  I need to write things down  
31  I have difficulty making decisions about my health  
32  Making changes to my lifestyle or habits is difficult for me  
33  None of the above  
34  
35  
36  
37

38 18. Do you experience sensory issues which make it difficult to visit your doctor?

39 Check ALL THAT APPLY

- 40  Bright or fluorescent lights  
41  Noise in the waiting room from other patients  
42  Music playing in the waiting room  
43  Noise from the reception desk  
44  Smells in the waiting room  
45  Smells in the doctor's office  
46  Crowded waiting area  
47  Uncomfortable furniture  
48  Touch, such as during examination  
49  Unexpected touch  
50  None of the above  
51  Other  
52  
53  
54  
55  
56

57 19. How would you describe your pain threshold?

- 58  Very high  
59  High  
60

- 1  
2  
3  Neither particularly high nor low  
4  Low  
5  Very low  
6  I don't know  
7  
8

9 20. What communication methods do you use?

10 Check ALL THAT APPLY

- 11  Verbal, face-to-face  
12  Verbal, telephone  
13  Voicemail  
14  Text messaging  
15  Online messaging  
16  Email  
17  Other online method  
18  Written  
19  Alternative communication device  
20  Sign language  
21  Other  
22  
23  
24  
25

26 21. What communication methods do you AVOID if possible?

27 Check ALL THAT APPLY

- 28  Verbal, face-to-face  
29  Verbal, telephone  
30  Voicemail  
31  Text messaging  
32  Online messaging  
33  Other online method  
34  Email  
35  Written  
36  Alternative communication device  
37  Sign language  
38  Other  
39  
40  
41  
42

43 22. If your GP offered options for making an appointment, which would you be most likely  
44 to use?

- 45  Verbal, face-to-face  
46  Verbal, telephone  
47  Voicemail  
48  Text messaging  
49  Email  
50  Online booking system  
51  Alternative communication device  
52  Other  
53  
54  
55

56 23. My doctors are really good for me because they are...

57 Check ALL THAT APPLY

- 58  Patient  
59  
60

- 1  
2  
3  Good listeners  
4  Understanding  
5  Supportive  
6  Kind  
7  Friendly  
8  Efficient  
9  Familiar  
10  Not condescending  
11  Aware of my needs  
12  Honest about not understanding autism  
13  None of the above  
14  
15  
16  
17

18 24. My doctors are really good for me because they...

19 Check ALL THAT APPLY

- 20  Ask direct questions  
21  Give clear explanations  
22  Accept written or email communication  
23  Use printed information and diagrams  
24  Value my opinion  
25  Accept my right to make decisions regarding my health  
26  Know that autism is not a mental health condition  
27  Do home visits  
28  Have reception staff who are trained regarding autism  
29  Remind me to make my next appointment before leaving  
30  None of the above  
31  
32  
33  
34

35 25. Do you find it difficult not knowing...

36 Check ALL THAT APPLY

- 37  Which doctor you will see  
38  How long you will wait  
39  How long the consultation will last  
40  What will happen during the consultation  
41  None of the above  
42  
43  
44

45 26. When going to the doctor, what causes you to feel anxious?

46 Check ALL THAT APPLY

- 47  asking for help  
48  discussing mental health  
49  that there might be something wrong  
50  that I might be considered a hypochondriac  
51  that I might be wasting the doctor's time  
52  I don't feel anxious going to the doctor  
53  
54  
55

56 27. Do you have mobility needs which make visiting your doctor difficult?

- 57  Yes  
58  No  
59  
60

1  
2  
3 28. My doctor is knowledgeable about physical conditions:

- 4  Strongly agree  
5  Agree  
6  Neutral  
7  Disagree  
8  Strongly disagree  
9  
10

11 29. My doctor is knowledgeable about mental health conditions:

- 12  Strongly agree  
13  Agree  
14  Neutral  
15  Disagree  
16  Strongly disagree  
17  
18  
19

20 30. My doctor is knowledgeable about autism:

- 21  Strongly agree  
22  Agree  
23  Neutral  
24  Disagree  
25  Strongly disagree  
26  
27  
28

29 31. Visits to my doctor would be easier if...

30 Check ALL THAT APPLY

- 31  I could book an appointment online  
32  I could book an appointment by text  
33  I could book the first or last appointment of the day  
34  I could wait in a quiet place or outside until it was my turn  
35  I could email my doctor in advance with a description of the issue I need to discuss  
36  There was a sensory box available in the waiting room  
37  None of the above  
38  Other  
39  
40  
41

42 32. Have you ever had a mental health condition remain untreated due to difficulties  
43 accessing healthcare?

- 44  Yes  
45  No  
46  Possibly  
47  Other  
48  
49

50 33. Have you ever had a physical health condition remain untreated due to difficulties  
51 accessing healthcare?

- 52  Yes  
53  No  
54  Possibly  
55  Other  
56  
57  
58  
59  
60

1  
2  
3 34. Have you even been referred to a specialist but did not make an appointment or did not  
4 attend?

5  Yes

6  No

7  
8  
9 35. Have you ever been told you should have seen a doctor sooner?

10  Yes

11  No

12  
13  
14 36. Have you ever had to undergo more extensive treatment or surgery than if you had  
15 attended sooner?

16  Yes

17  No

18  
19  
20 37. Have you ever had a potentially serious or life threatening condition for which you did  
21 not access treatment?

22  Yes

23  No

24  
25  
26 38. If you answered yes to any of the last 6 questions, would you like to give more details?

27  
28  
29 39. Do you attend on schedule for screening programmes applicable to you?

30 Includes cervical screening, sexual health screening, breast check, colon screening etc.

31  Yes

32  No

33  Sometimes

34  
35  
36 40. If you were suddenly admitted to hospital, who would be able to bring your personal  
37 belongings to you?

38 Check ALL THAT APPLY

39  Spouse or partner

40  Parent

41  Other family member

42  Friend

43  Neighbour

44  Paid support person or carer

45  Volunteer support person or carer

46  Nobody available

47  Other

48  
49  
50  
51  
52 41. If you were admitted to hospital for a day case surgical procedure, who would be  
53 available to collect you afterwards?

54 Check ALL THAT APPLY

55  Spouse or partner

56  Parent

57  Other family member

58  Friend



- 1  
2  
3  Neighbour  
4  Paid support person or carer  
5  Volunteer support person or carer  
6  Nobody available  
7  Other  
8  
9

10  
11 42. If you needed assistance at home after an operation, who would be available to provide  
12 that care?

13 Check ALL THAT APPLY

- 14  Spouse or partner  
15  Parent  
16  Other family member  
17  Friend  
18  Neighbour  
19  Paid support person or carer  
20  Volunteer support person or carer  
21  Nobody available  
22  Other  
23  
24  
25

26  
27 43. If you are a parent and you were unable to care for your child due to illness, who would  
28 be available to provide that care to your child?

29 Check ALL THAT APPLY

- 30  Spouse or partner  
31  Parent  
32  Other family member  
33  Friend  
34  Neighbour  
35  Paid support person or carer  
36  Volunteer support person or carer  
37  Nobody available  
38  I don't have a child requiring care  
39  Other  
40  
41  
42

43  
44 44. Do you identify as autistic?

45 Includes Autism, Autistic Spectrum Conditions, Asperger Syndrome, self-diagnosed or  
46 formally diagnosed.

- 47  Yes  
48  No  
49  Possibly  
50

51  
52 45. Do you have a formal diagnosis? \*

- 53  Yes  
54  No  
55

56  
57 46. If you have a formal diagnosis, was it provided by:

- 58  Psychiatrist  
59  Clinical Psychologist  
60

- 1  
2  
3  Multidisciplinary Team  
4  Other  
5

6  
7 47. Does your doctor know you are autistic? \*

- 8  Yes  
9  No  
10  I don't know  
11

12  
13 48. What is your age?  
14

15 49. What age were you when you were diagnosed?  
16 If applicable  
17

18  
19 50. Which country do you live in?

- 20  England  
21  Scotland  
22  Wales  
23  Northern Ireland  
24  Republic of Ireland  
25  United States  
26  Canada  
27  Other:  
28  
29  
30

31 51. What is your gender?

- 32  Male  
33  Female  
34  Non-binary  
35  Prefer not to say  
36  
37

38 52. Please give any further information or suggestions here.  
39  
40  
41  
42  
43  
44  
45  
46  
47  
48  
49  
50  
51  
52  
53  
54  
55  
56  
57  
58  
59  
60

**Table S1 Access Barriers to Healthcare****Which of the following would cause you to delay or avoid seeing your doctor when you need to?**

|                                                                 | <b>Autistic n (%)</b> | <b>Non-autistic n (%)</b> | <b>Difference (95% Confidence Interval)</b> | <b>p value</b> |
|-----------------------------------------------------------------|-----------------------|---------------------------|---------------------------------------------|----------------|
| Difficulty deciding if symptoms warrant a GP visit              | 366 (72%)             | 102 (65%)                 | 7% (CI -1.6%,16.1%)                         | p=0.102 ns     |
| Difficulty using the telephone to book appointment              | 314 (62%)             | 25 (16%)                  | 46% (CI 38.5%,53.5%)                        | p<0.001        |
| Not feeling understood                                          | 283 (56%)             | 21 (13%)                  | 42% (CI 35.2%,49.7%)                        | p<0.001        |
| Difficulty communicating with the doctor during the appointment | 269 (53%)             | 10 (6%)                   | 47% (CI 40.5, 52.9%)                        | p<0.001        |
| The waiting room environment                                    | 256 (51%)             | 12 (8%)                   | 43% (CI 36.4%,49.3%)                        | p<0.001        |
| Long wait to get an appointment                                 | 251 (50%)             | 70 (45%)                  | 5% (CI -4.4%,14.2%)                         | p=0.324 ns     |
| Difficulty planning an appointment in advance                   | 243 (48%)             | 51 (33%)                  | 15% (CI 6.5%,24.4%)                         | p<0.001        |
| Inability to see a known or preferred doctor                    | 241 (48%)             | 35 (23%)                  | 25% (CI 17.0%,33.5%)                        | p<0.001        |
| Difficulty communicating with the reception staff               | 235 (46%)             | 13 (8%)                   | 38% (CI 31.5%,44.6%)                        | p<0.001        |
| Not having enough time to visit the doctor                      | 174 (34%)             | 61 (39%)                  | -5% (CI -13.6%,4.6%)                        | p=0.346 ns     |
| No online booking system                                        | 160 (32%)             | 35 (23%)                  | 9% (CI 1.2%,17.3%)                          | p=0.033        |
| Waiting to see the doctor is too difficult                      | 114 (23%)             | 7 (5%)                    | 18% (CI 12.7%,23.3%)                        | p<0.001        |
| Needing a support person to come with me                        | 106 (21%)             | 7 (5%)                    | 16% (CI 11.2%,21.7%)                        | p<0.001        |
| There is an online booking system but it's confusing            | 102 (20%)             | 9 (6%)                    | 14% (CI 8.9%,19.8%)                         | p<0.001        |
| Not having anyone to look after my child                        | 66 (13%)              | 18 (12%)                  | 2% (CI -4.6%,7.8%)                          | p=0.708 ns     |
| None of the above                                               | 6 (1%)                | 17 (11%)                  | -10% (CI -15.0%,-4.3%)                      | p<0.001        |

**Table S2 Perceived Stigma**

|                                                                               | <b>Autistic n (%)</b> | <b>Non-autistic n (%)</b> | <b>Difference (95% Confidence Interval)</b> | <b>p value</b> |
|-------------------------------------------------------------------------------|-----------------------|---------------------------|---------------------------------------------|----------------|
| <b><u>Going to the doctor, I am anxious :</u></b>                             |                       |                           |                                             |                |
| I won't be taken seriously when I describe my symptoms                        | 341 (67%)             | 54 (34%)                  | 32.9% (CI 24.0%,41.8%)                      | p<0.001        |
| I might be wasting the doctor's time                                          | 333 (66%)             | 53 (34%)                  | 31.9% (CI 23.0%,40.8%)                      | p<0.001        |
| I might be considered a hypochondriac about asking for help                   | 330 (65%)             | 42 (27%)                  | 38.3% (CI 29.8%,46.8%)                      | p<0.001        |
| about discussing mental health                                                | 318 (63%)             | 28 (18%)                  | 44.9% (CI 37.2%,52.6%)                      | p<0.001        |
| that there might be something wrong                                           | 301 (59%)             | 37 (24%)                  | 35.8% (CI 27.5%,44.1%)                      | p<0.001        |
| I don't feel anxious going to the doctor                                      | 217 (43%)             | 55 (35%)                  | 7.8% (CI -1.3%,16.8%)                       | p=0.102 ns     |
| 17 (3%)                                                                       | 52 (33%)              | -30% (CI -37.7%,-21.8%)   | p<0.001                                     |                |
| <b><u>Is stimming* a problem for you at the doctors' office?</u></b>          |                       |                           |                                             |                |
| Unusual behaviours or stimming elicit negative reactions from other patients  | 74 (14.6%)            | 4 (2.5%)                  | 12% (CI 7.7%,16.4%)                         | p<0.001        |
| Unusual behaviours or stimming elicit negative reactions from reception staff | 44 (8.7%)             | 1 (0.6%)                  | 8% (CI 4.9%,11.2%)                          | p=0.001        |
| Unusual behaviours or stimming elicit negative reactions from medical staff   | 37 (7.3%)             | 2 (1.3%)                  | 6% (CI 2.7%,9.3%)                           | p=0.009        |
| I feel comfortable with stimming at the doctors' office                       | 101 (19.9%)           | 74 (47.1%)                | -27% (CI -36.2%,-18.2%)                     | p<0.001        |
| I do not feel comfortable with stimming at the doctors' office                | 4 (0.8%)              | 5 (3.2%)                  | -2% (CI -5.7%,0.9%)                         | p=0.061 ns     |
| No need to stim at the doctors' office                                        | 133 (26.2%)           | 0 (0.0%)                  | 26% (CI 22.0%,30.5%)                        | p<0.001        |
| I don't understand the term "stimming"                                        | 29 (5.7%)             | 62 (39.5%)                | -34% (CI -42.1%,-25.4%)                     | p<0.001        |

\*Stimming refers to repetitive motor movements or vocalisations which are commonly used by autistic people as a self-regulatory mechanism.

Table S3 Planning and Organising

|                                                                       | <b>Autistic n (%)</b> | <b>Non-<br/>autistic n (%)</b> | <b>Difference<br/>(95% Confidence Interval)</b> | <b>p value</b> |
|-----------------------------------------------------------------------|-----------------------|--------------------------------|-------------------------------------------------|----------------|
| I find it difficult to prioritise when describing my medical problems | 333 (66%)             | 34 (22%)                       | 44% (CI 36.0%,52.1%)                            | p<0.001        |
| I need to give the whole story and not leave anything out             | 332 (66%)             | 18 (12%)                       | 54% (CI 47.1%,60.9%)                            | p<0.001        |
| I find it difficult to make appointments in advance                   | 300 (59%)             | 45 (29%)                       | 31% (CI 21.8%,39.2%)                            | p<0.001        |
| Making changes to my lifestyle or habits is difficult for me          | 282 (56%)             | 36 (23%)                       | 33% (CI 24.4%,41.0%)                            | p<0.001        |
| I have forgotten to attend a medical appointment                      | 230 (45%)             | 34 (22%)                       | 24% (CI 15.5%,31.9%)                            | p<0.001        |
| I need to write things down                                           | 227 (45%)             | 17 (11%)                       | 34% (CI 27.0%,40.9%)                            | p<0.001        |
| I find waiting difficult                                              | 221 (44%)             | 15 (10%)                       | 34% (CI 27.3%,40.8%)                            | p<0.001        |
| I have difficulty making decisions about my health                    | 222 (44%)             | 20 (13%)                       | 31% (CI 23.9%,38.2%)                            | p<0.001        |
| I have turned up for a medical appointment on the wrong day           | 151 (30%)             | 16 (10%)                       | 20% (CI 13.0%,26.2%)                            | p<0.001        |
| It is difficult to arrange someone to come with me                    | 103 (20%)             | 2 (1%)                         | 19% (CI 14.7%,23.4%)                            | p<0.001        |
| I have forgotten why I made the appointment                           | 54 (11%)              | 1 (1%)                         | 10% (CI 6.6%,13.4%)                             | p<0.001        |
| None of the above                                                     | 13 (3%)               | 64 (41%)                       | -38% (CI -46.4%,-30.0%)                         | p<0.001        |

**Table S4 Support Needs**

| <b><u>Do you visit your doctor:</u></b>                                 | <b>Autistic n (%)</b> | <b>Non-autistic n (%)</b> | <b>Difference (95% Confidence Interval)</b> | <b>p value</b> |
|-------------------------------------------------------------------------|-----------------------|---------------------------|---------------------------------------------|----------------|
| Alone, by choice                                                        | 306 (60%)             | 134 (85%)                 | -25% (CI -32.4%,-17.6%)                     | p<0.001        |
| Alone, but would prefer to have a support person                        | 165 (33%)             | 10 (6%)                   | 26% (CI 20.2%,32.2%)                        | p<0.001        |
| With a parent, partner or support person                                | 137 (27%)             | 9 (6%)                    | 21% (CI 15.6%,27.0%)                        | p<0.001        |
| With a parent, partner or support person but I would prefer to go alone | 12 (2%)               | 0 (0%)                    | 2% (CI 0.6%,4.1%)                           | p=0.109 ns     |
| With a support animal                                                   | 5 (1%)                | 0 (0%)                    | 1% (CI -0.3%,2.3%)                          | p=0.471 ns     |
| To support an autistic adult                                            | 26 (5%)               | 0 (0%)                    | 5% (CI 2.8%,7.5%)                           | p=0.008        |
| As a parent to access healthcare for my child                           | 78 (15%)              | 30 (19%)                  | -4% (CI -11.0%,3.6%)                        | p=0.327 ns     |
| With my child, but I would prefer to go alone                           | 6 (1%)                | 12 (8%)                   | -7% (CI -11.1%,-1.8%)                       | p<0.001        |

  

| <b><u>If you were suddenly admitted to hospital, who would be able to bring your personal belongings to you?</u></b> | <b>Autistic n (%)</b> | <b>Non-autistic n (%)</b> | <b>Difference (95% Confidence Interval)</b> | <b>p value</b> |
|----------------------------------------------------------------------------------------------------------------------|-----------------------|---------------------------|---------------------------------------------|----------------|
| Spouse or partner                                                                                                    | 234 (46%)             | 106 (68%)                 | -21% (CI -30.3%,-12.4%)                     | p<0.001        |
| Parent                                                                                                               | 168 (33%)             | 70 (45%)                  | -11% (CI -20.7%,-2.2%)                      | p=0.012        |
| Other family member                                                                                                  | 96 (19%)              | 72 (46%)                  | -27% (CI -35.8%,-18.0%)                     | p<0.001        |
| Friend                                                                                                               | 118 (23%)             | 57 (36%)                  | -13% (CI -21.8%,-4.2%)                      | p=0.002        |
| Neighbour                                                                                                            | 17 (3%)               | 14 (9%)                   | -6% (CI -10.7%,-0.4%)                       | p=0.008        |
| Paid support person or carer                                                                                         | 15 (3%)               | 1 (1%)                    | 2% (CI -0.0%,4.7%)                          | p=0.174 ns     |
| Volunteer support person or carer                                                                                    | 6 (1%)                | 0 (0%)                    | 1% (CI -0.2%,2.5%)                          | p=0.375 ns     |
| Nobody available                                                                                                     | 88 (17%)              | 5 (3%)                    | 14% (CI 9.5%,18.9%)                         | p<0.001        |

  

| <b><u>If you were admitted to hospital for a day case surgical procedure, who would be available to collect you afterwards?</u></b> | <b>Autistic n (%)</b> | <b>Non-autistic n (%)</b> | <b>Difference (95% Confidence Interval)</b> | <b>p value</b> |
|-------------------------------------------------------------------------------------------------------------------------------------|-----------------------|---------------------------|---------------------------------------------|----------------|
| Spouse or partner                                                                                                                   | 208 (41%)             | 100 (64%)                 | -23% (CI -31.7%,-13.6%)                     | p<0.001        |

|                                   |           |          |                         |            |
|-----------------------------------|-----------|----------|-------------------------|------------|
| Parent                            | 176 (35%) | 73 (47%) | -12% (CI -21.0%,-2.5%)  | p=0.010    |
| Other family member               | 96 (19%)  | 75 (48%) | -29% (CI -37.8%,-19.9%) | p<0.001    |
| Friend                            | 116 (23%) | 67 (43%) | -29% (CI -37.8%,-19.9%) | p<0.001    |
| Neighbour                         | 17 (3%)   | 8 (5%)   | -2% (CI -5.9%,2.5%)     | p=0.446 ns |
| Paid support person or carer      | 17 (3%)   | 0 (0%)   | 3% (CI 1.4%,5.3%)       | p=0.042    |
| Volunteer support person or carer | 3 (1%)    | 0 (0%)   | 1% (CI -0.5%,1.7%)      | p=0.776 ns |
| Nobody available                  | 99 (20%)  | 3 (2%)   | 18% (CI 13.1%,22.1%)    | p<0.001    |

**If you needed assistance at home after an operation, who would be available to provide that care?**

|                                   | Autistic n (%) | Non-autistic n (%) | Difference (95% Confidence Interval) | p value    |
|-----------------------------------|----------------|--------------------|--------------------------------------|------------|
| Spouse or partner                 | 219 (43%)      | 101 (64%)          | -21% (CI -30.2%,-12.1%)              | p<0.001    |
| Parent                            | 152 (30%)      | 74 (47%)           | -17% (CI -26.3%,-8.0%)               | p<0.001    |
| Other family member               | 83 (16%)       | 61 (39%)           | -23% (CI -31.2%,-13.8%)              | p<0.001    |
| Friend                            | 74 (15%)       | 43 (27%)           | -13% (CI -20.8%,-4.8%)               | p<0.001    |
| Neighbour                         | 14 (3%)        | 8 (5%)             | -2% (CI -6.5%,1.8%)                  | p=0.241 ns |
| Paid support person or carer      | 30 (6%)        | 3 (2%)             | 4% (CI 0.6%,7.4%)                    | p=0.071 ns |
| Volunteer support person or carer | 4 (1%)         | 0 (0%)             | 1% (CI -0.4%,2.0%)                   | p=0.599 ns |
| Nobody available                  | 131 (26%)      | 13 (8%)            | 18% (CI 11.4%,23.7%)                 | p<0.001    |

**If you are a parent and you were unable to care for your child due to illness, who would be available to provide that care to your child?**

|                     | Autistic n (%) | Non-autistic n (%) | Difference (95% Confidence Interval) | p value |
|---------------------|----------------|--------------------|--------------------------------------|---------|
| Spouse or partner   | 110 (22%)      | 64 (41%)           | -19% (CI -28.0%,-10.2%)              | p<0.001 |
| Parent              | 37 (7%)        | 40 (26%)           | -18% (CI -25.8%,-10.6%)              | p<0.001 |
| Other family member | 40 (8%)        | 40 (26%)           | -18% (CI -25.2%,-10.0%)              | p<0.001 |
| Friend              | 21 (4%)        | 27 (17%)           | -13% (CI -19.6%,-6.5%)               | p<0.001 |
| Neighbour           | 4 (1%)         | 8 (5%)             | -5% (CI -8.2%,-0.4%)                 | p<0.001 |

|    |                                     |           |          |                      |            |
|----|-------------------------------------|-----------|----------|----------------------|------------|
| 1  |                                     |           |          |                      |            |
| 2  |                                     |           |          |                      |            |
| 3  |                                     |           |          |                      |            |
| 4  | Paid support person or carer        | 5 (1%)    | 9 (6%)   | -5% (CI -8.9%,-0.6%) | p<0.001    |
| 5  | Volunteer support person or carer   | 1 (1%)    | 0 (0%)   | 0% (CI -0.4%,0.8%)   | p=1.000 ns |
| 6  | Nobody available                    | 34 (7%)   | 6 (4%)   | 3% (CI -1.2%,7.0%)   | p=0.256 ns |
| 7  | I don't have a child requiring care | 274 (54%) | 78 (50%) | 4% (CI -5.0%,13.7%)  | p=0.387 ns |
| 8  |                                     |           |          |                      |            |
| 9  |                                     |           |          |                      |            |
| 10 |                                     |           |          |                      |            |
| 11 |                                     |           |          |                      |            |
| 12 |                                     |           |          |                      |            |
| 13 |                                     |           |          |                      |            |
| 14 |                                     |           |          |                      |            |
| 15 |                                     |           |          |                      |            |
| 16 |                                     |           |          |                      |            |
| 17 |                                     |           |          |                      |            |
| 18 |                                     |           |          |                      |            |
| 19 |                                     |           |          |                      |            |
| 20 |                                     |           |          |                      |            |
| 21 |                                     |           |          |                      |            |
| 22 |                                     |           |          |                      |            |
| 23 |                                     |           |          |                      |            |
| 24 |                                     |           |          |                      |            |
| 25 |                                     |           |          |                      |            |
| 26 |                                     |           |          |                      |            |
| 27 |                                     |           |          |                      |            |
| 28 |                                     |           |          |                      |            |
| 29 |                                     |           |          |                      |            |
| 30 |                                     |           |          |                      |            |
| 31 |                                     |           |          |                      |            |
| 32 |                                     |           |          |                      |            |
| 33 |                                     |           |          |                      |            |
| 34 |                                     |           |          |                      |            |
| 35 |                                     |           |          |                      |            |
| 36 |                                     |           |          |                      |            |
| 37 |                                     |           |          |                      |            |
| 38 |                                     |           |          |                      |            |
| 39 |                                     |           |          |                      |            |
| 40 |                                     |           |          |                      |            |
| 41 |                                     |           |          |                      |            |
| 42 |                                     |           |          |                      |            |
| 43 |                                     |           |          |                      |            |
| 44 |                                     |           |          |                      |            |
| 45 |                                     |           |          |                      |            |
| 46 |                                     |           |          |                      |            |

For peer review only



Table S5 Facilitators

| <b>Visits to my doctor would be easier if:</b>                             | <b>Autistic n (%)</b> | <b>Non-<br/>autistic n (%)</b> | <b>Difference<br/>(95% Confidence Interval)</b> | <b>p value</b> |
|----------------------------------------------------------------------------|-----------------------|--------------------------------|-------------------------------------------------|----------------|
| I could book an appointment online                                         | 339 (67%)             | 102 (65%)                      | 2% (CI -7.0%,10.8%)                             | p=0.732 ns     |
| I could email in advance with a description of the issue I need to discuss | 316 (62%)             | 35 (22%)                       | 40% (CI 31.9%,48.2%)                            | p<0.001        |
| I could wait in a quiet place or outside until it was my turn              | 284 (56%)             | 13 (8%)                        | 48% (CI 41.2%,54.3%)                            | p<0.001        |
| I could book the first or last appointment of the day                      | 210 (41%)             | 38 (24%)                       | 17% (CI 8.8%,25.6%)                             | p<0.001        |
| I could book an appointment by text                                        | 209 (41%)             | 44 (28%)                       | 13% (CI 4.6%,21.8%)                             | p=0.004        |
| There was a sensory box* available in the waiting room                     | 80 (16%)              | 4 (3%)                         | 13% (CI 8.8%,17.7%)                             | p<0.001        |
| None of the above                                                          | 16 (3%)               | 34 (22%)                       | -19% (CI -25.5%,-11.5%)                         | p<0.001        |

\*A sensory box contains items to manage sensory stress, such as sunglasses, ear defenders or ear plugs, items providing tactile sensory input such as fidget tools and olfactory input such as scented items.

## STROBE Statement—checklist of items that should be included in reports of observational studies

|                              | Item No. | Recommendation                                                                                                                                                                             | Page No. | Relevant text from manuscript |
|------------------------------|----------|--------------------------------------------------------------------------------------------------------------------------------------------------------------------------------------------|----------|-------------------------------|
| <b>Title and abstract</b>    | 1        | (a) Indicate the study's design with a commonly used term in the title or the abstract                                                                                                     | Pg 2     | Lines 4 - 10                  |
|                              |          | (b) Provide in the abstract an informative and balanced summary of what was done and what was found                                                                                        | Pg 3     | Lines 13 - 17 & 30-46         |
| <b>Introduction</b>          |          |                                                                                                                                                                                            |          |                               |
| Background/rationale         | 2        | Explain the scientific background and rationale for the investigation being reported                                                                                                       | Pg 5 - 6 | Lines 17 (pg 5) - 37 (pg 6)   |
| Objectives                   | 3        | State specific objectives, including any prespecified hypotheses                                                                                                                           | Pg 6     | Lines 42 - 52                 |
| <b>Methods</b>               |          |                                                                                                                                                                                            |          |                               |
| Study design                 | 4        | Present key elements of study design early in the paper                                                                                                                                    | Pg 7 - 8 | Lines 17 (pg 7) - 28 (pg 8)   |
| Setting                      | 5        | Describe the setting, locations, and relevant dates, including periods of recruitment, exposure, follow-up, and data collection                                                            | Pg 8     | Lines 32 - 52                 |
| Participants                 | 6        | (a) <i>Cohort study</i> —Give the eligibility criteria, and the sources and methods of selection of participants. Describe methods of follow-up                                            | Pg 8     | Lines 33 - 43                 |
|                              |          | <i>Case-control study</i> —Give the eligibility criteria, and the sources and methods of case ascertainment and control selection. Give the rationale for the choice of cases and controls |          |                               |
|                              |          | <i>Cross-sectional study</i> —Give the eligibility criteria, and the sources and methods of selection of participants                                                                      |          |                               |
|                              |          | (b) <i>Cohort study</i> —For matched studies, give matching criteria and number of exposed and unexposed                                                                                   |          |                               |
|                              |          | <i>Case-control study</i> —For matched studies, give matching criteria and the number of controls per case                                                                                 |          |                               |
| Variables                    | 7        | Clearly define all outcomes, exposures, predictors, potential confounders, and effect modifiers. Give diagnostic criteria, if applicable                                                   | N/A      |                               |
| Data sources/<br>measurement | 8*       | For each variable of interest, give sources of data and details of methods of assessment (measurement). Describe comparability of assessment methods if there is more than one group       | Pg 8     | Lines 33 - 53                 |
| Bias                         | 9        | Describe any efforts to address potential sources of bias                                                                                                                                  | Pg 8     | Lines 33 - 43, & 47 - 53      |
| Study size                   | 10       | Explain how the study size was arrived at                                                                                                                                                  | Pg 8     | Lines 33 - 43                 |

Continued on next page

|                        |     |                                                                                                                                                                                                                    |              |                               |
|------------------------|-----|--------------------------------------------------------------------------------------------------------------------------------------------------------------------------------------------------------------------|--------------|-------------------------------|
| Quantitative variables | 11  | Explain how quantitative variables were handled in the analyses. If applicable, describe which groupings were chosen and why                                                                                       | Pg 9         | Lines 9 - 11                  |
| Statistical methods    | 12  | (a) Describe all statistical methods, including those used to control for confounding                                                                                                                              | Pg 9         | Lines 3 - 9                   |
|                        |     | (b) Describe any methods used to examine subgroups and interactions                                                                                                                                                | Pg 9         | Lines 3 - 6                   |
|                        |     | (c) Explain how missing data were addressed                                                                                                                                                                        | Pg 9         | Lines 6 - 9                   |
|                        |     | (d) <i>Cohort study</i> —If applicable, explain how loss to follow-up was addressed                                                                                                                                | N/A          |                               |
|                        |     | <i>Case-control study</i> —If applicable, explain how matching of cases and controls was addressed<br><i>Cross-sectional study</i> —If applicable, describe analytical methods taking account of sampling strategy |              |                               |
|                        |     | (e) Describe any sensitivity analyses                                                                                                                                                                              | None         |                               |
| <b>Results</b>         |     |                                                                                                                                                                                                                    |              |                               |
| Participants           | 13* | (a) Report numbers of individuals at each stage of study—eg numbers potentially eligible, examined for eligibility, confirmed eligible, included in the study, completing follow-up, and analysed                  | Pg 9         | Lines 35 - 38                 |
|                        |     | (b) Give reasons for non-participation at each stage                                                                                                                                                               | N/A          |                               |
|                        |     | (c) Consider use of a flow diagram                                                                                                                                                                                 | N/A          |                               |
| Descriptive data       | 14* | (a) Give characteristics of study participants (eg demographic, clinical, social) and information on exposures and potential confounders                                                                           | Pg 9-10      | Lines 42 (pg 9) – 21 (pg 10)  |
|                        |     | (b) Indicate number of participants with missing data for each variable of interest                                                                                                                                | N/A          |                               |
|                        |     | (c) <i>Cohort study</i> —Summarise follow-up time (eg, average and total amount)                                                                                                                                   |              |                               |
| Outcome data           | 15* | <i>Cohort study</i> —Report numbers of outcome events or summary measures over time                                                                                                                                |              |                               |
|                        |     | <i>Case-control study</i> —Report numbers in each exposure category, or summary measures of exposure                                                                                                               |              |                               |
|                        |     | <i>Cross-sectional study</i> —Report numbers of outcome events or summary measures                                                                                                                                 | Not reported |                               |
| Main results           | 16  | (a) Give unadjusted estimates and, if applicable, confounder-adjusted estimates and their precision (eg, 95% confidence interval). Make clear which confounders were adjusted for and why they were included       | Pg 10 - 16   | Lines 25 (pg 10) – 55 (pg 16) |
|                        |     | (b) Report category boundaries when continuous variables were categorized                                                                                                                                          | N/A          |                               |
|                        |     | (c) If relevant, consider translating estimates of relative risk into absolute risk for a meaningful time period                                                                                                   | N/A          |                               |

Continued on next page

|                          |    |                                                                                                                                                                            |                     |                                                |
|--------------------------|----|----------------------------------------------------------------------------------------------------------------------------------------------------------------------------|---------------------|------------------------------------------------|
| Other analyses           | 17 | Report other analyses done—eg analyses of subgroups and interactions, and sensitivity analyses                                                                             | Pg 17 - 20          | Lines 3 (pg 17) – 15 (pg 20)                   |
| <b>Discussion</b>        |    |                                                                                                                                                                            |                     |                                                |
| Key results              | 18 | Summarise key results with reference to study objectives                                                                                                                   | Pg 20               | Lines 25 - 52                                  |
| Limitations              | 19 | Discuss limitations of the study, taking into account sources of potential bias or imprecision. Discuss both direction and magnitude of any potential bias                 | Pg 21 - 22          | Lines 43 (pg 21) – 14 (pg 22)                  |
| Interpretation           | 20 | Give a cautious overall interpretation of results considering objectives, limitations, multiplicity of analyses, results from similar studies, and other relevant evidence | Pg 20<br>Pg 23 - 24 | Lines 52 - 57<br>Lines 46 (pg 23) – 23 (pg 24) |
| Generalisability         | 21 | Discuss the generalisability (external validity) of the study results                                                                                                      | Pg 21               | Lines 43 - 46                                  |
| <b>Other information</b> |    |                                                                                                                                                                            |                     |                                                |
| Funding                  | 22 | Give the source of funding and the role of the funders for the present study and, if applicable, for the original study on which the present article is based              | Pg 25               | Lines 6 - 7                                    |

\*Give information separately for cases and controls in case-control studies and, if applicable, for exposed and unexposed groups in cohort and cross-sectional studies.

**Note:** An Explanation and Elaboration article discusses each checklist item and gives methodological background and published examples of transparent reporting. The STROBE checklist is best used in conjunction with this article (freely available on the Web sites of PLoS Medicine at <http://www.plosmedicine.org/>, Annals of Internal Medicine at <http://www.annals.org/>, and Epidemiology at <http://www.epidem.com/>). Information on the STROBE Initiative is available at [www.strobe-statement.org](http://www.strobe-statement.org).
