# Supplementary material for: Barriers to healthcare and self-reported adverse outcomes for autistic adults: a cross-sectional study
Source: PubMed Central journal article supplement — BMJ Open. 2022 Feb 22;12(2):e056904. doi: 10.1136/bmjopen-2021-056904 (PMC8883251; doi:10.1136/bmjopen-2021-056904), 2022-02-22
Supplement: bmjopen-2021-056904supp001.pdf [file bmjopen-2021-056904supp001.pdf]

Table S1 Access Barriers to Healthcare

**Which of the following would cause you to delay or avoid seeing your doctor when you need to?**

|                                                                 | <b>Autistic n (%)</b> | <b>Non-autistic n (%)</b> | <b>Difference (95% Confidence Interval)</b> | <b>p value</b> |
|-----------------------------------------------------------------|-----------------------|---------------------------|---------------------------------------------|----------------|
| Difficulty deciding if symptoms warrant a GP visit              | 366 (72%)             | 102 (65%)                 | 7% (CI -1.6%,16.1%)                         | p=0.102 ns     |
| Difficulty using the telephone to book appointment              | 314 (62%)             | 25 (16%)                  | 46% (CI 38.5%,53.5%)                        | p<0.001        |
| Not feeling understood                                          | 283 (56%)             | 21 (13%)                  | 42% (CI 35.2%,49.7%)                        | p<0.001        |
| Difficulty communicating with the doctor during the appointment | 269 (53%)             | 10 (6%)                   | 47% (CI 40.5, 52.9%)                        | p<0.001        |
| The waiting room environment                                    | 256 (51%)             | 12 (8%)                   | 43% (CI 36.4%,49.3%)                        | p<0.001        |
| Long wait to get an appointment                                 | 251 (50%)             | 70 (45%)                  | 5% (CI -4.4%,14.2%)                         | p=0.324 ns     |
| Difficulty planning an appointment in advance                   | 243 (48%)             | 51 (33%)                  | 15% (CI 6.5%,24.4%)                         | p<0.001        |
| Inability to see a known or preferred doctor                    | 241 (48%)             | 35 (23%)                  | 25% (CI 17.0%,33.5%)                        | p<0.001        |
| Difficulty communicating with the reception staff               | 235 (46%)             | 13 (8%)                   | 38% (CI 31.5%,44.6%)                        | p<0.001        |
| Not having enough time to visit the doctor                      | 174 (34%)             | 61 (39%)                  | -5% (CI -13.6%,4.6%)                        | p=0.346 ns     |
| No online booking system                                        | 160 (32%)             | 35 (23%)                  | 9% (CI 1.2%,17.3%)                          | p=0.033        |
| Waiting to see the doctor is too difficult                      | 114 (23%)             | 7 (5%)                    | 18% (CI 12.7%,23.3%)                        | p<0.001        |
| Needing a support person to come with me                        | 106 (21%)             | 7 (5%)                    | 16% (CI 11.2%,21.7%)                        | p<0.001        |
| There is an online booking system but it's confusing            | 102 (20%)             | 9 (6%)                    | 14% (CI 8.9%,19.8%)                         | p<0.001        |
| Not having anyone to look after my child                        | 66 (13%)              | 18 (12%)                  | 2% (CI -4.6%,7.8%)                          | p=0.708 ns     |
| None of the above                                               | 6 (1%)                | 17 (11%)                  | -10% (CI -15.0%,-4.3%)                      | p<0.001        |

**Table S2 Perceived Stigma**

| <b><u>Going to the doctor, I am anxious :</u></b>                             | <b>Autistic n (%)</b> | <b>Non-<br/>autistic n (%)</b> | <b>Difference<br/>(95% Confidence Interval)</b> | <b>p value</b> |
|-------------------------------------------------------------------------------|-----------------------|--------------------------------|-------------------------------------------------|----------------|
| I won't be taken seriously when I describe my symptoms                        | 341 (67%)             | 54 (34%)                       | 32.9% (CI 24.0%,41.8%)                          | p<0.001        |
| I might be wasting the doctor's time                                          | 333 (66%)             | 53 (34%)                       | 31.9% (CI 23.0%,40.8%)                          | p<0.001        |
| I might be considered a hypochondriac about asking for help                   | 330 (65%)             | 42 (27%)                       | 38.3% (CI 29.8%,46.8%)                          | p<0.001        |
| about discussing mental health                                                | 318 (63%)             | 28 (18%)                       | 44.9% (CI 37.2%,52.6%)                          | p<0.001        |
| that there might be something wrong                                           | 301 (59%)             | 37 (24%)                       | 35.8% (CI 27.5%,44.1%)                          | p<0.001        |
| I don't feel anxious going to the doctor                                      | 217 (43%)             | 55 (35%)                       | 7.8% (CI -1.3%,16.8%)                           | p=0.102 ns     |
|                                                                               | 17 (3%)               | 52 (33%)                       | -30% (CI -37.7%,-21.8%)                         | p<0.001        |
| <br>                                                                          |                       |                                |                                                 |                |
| <b><u>Is stimming* a problem for you at the doctors' office?</u></b>          | <b>Autistic n (%)</b> | <b>Non-<br/>autistic n (%)</b> | <b>Difference<br/>(95% Confidence Interval)</b> | <b>p value</b> |
| Unusual behaviours or stimming elicit negative reactions from other patients  | 74 (14.6%)            | 4 (2.5%)                       | 12% (CI 7.7%,16.4%)                             | p<0.001        |
| Unusual behaviours or stimming elicit negative reactions from reception staff | 44 (8.7%)             | 1 (0.6%)                       | 8% (CI 4.9%,11.2%)                              | p=0.001        |
| Unusual behaviours or stimming elicit negative reactions from medical staff   | 37 (7.3%)             | 2 (1.3%)                       | 6% (CI 2.7%,9.3%)                               | p=0.009        |
| I feel comfortable with stimming at the doctors' office                       | 101 (19.9%)           | 74 (47.1%)                     | -27% (CI -36.2%,-18.2%)                         | p<0.001        |
| I do not feel comfortable with stimming at the doctors' office                | 4 (0.8%)              | 5 (3.2%)                       | -2% (CI -5.7%,0.9%)                             | p=0.061 ns     |
| No need to stim at the doctors' office                                        | 133 (26.2%)           | 0 (0.0%)                       | 26% (CI 22.0%,30.5%)                            | p<0.001        |
| I don't understand the term "stimming"                                        | 29 (5.7%)             | 62 (39.5%)                     | -34% (CI -42.1%,-25.4%)                         | p<0.001        |

\*Stimming refers to repetitive motor movements or vocalisations which are commonly used by autistic people as a self-regulatory mechanism.

**Table S3 Planning and Organising**

|                                                                       | <b>Autistic n (%)</b> | <b>Non-autistic n (%)</b> | <b>Difference (95% Confidence Interval)</b> | <b>p value</b> |
|-----------------------------------------------------------------------|-----------------------|---------------------------|---------------------------------------------|----------------|
| I find it difficult to prioritise when describing my medical problems | 333 (66%)             | 34 (22%)                  | 44% (CI 36.0%,52.1%)                        | p<0.001        |
| I need to give the whole story and not leave anything out             | 332 (66%)             | 18 (12%)                  | 54% (CI 47.1%,60.9%)                        | p<0.001        |
| I find it difficult to make appointments in advance                   | 300 (59%)             | 45 (29%)                  | 31% (CI 21.8%,39.2%)                        | p<0.001        |
| Making changes to my lifestyle or habits is difficult for me          | 282 (56%)             | 36 (23%)                  | 33% (CI 24.4%,41.0%)                        | p<0.001        |
| I have forgotten to attend a medical appointment                      | 230 (45%)             | 34 (22%)                  | 24% (CI 15.5%,31.9%)                        | p<0.001        |
| I need to write things down                                           | 227 (45%)             | 17 (11%)                  | 34% (CI 27.0%,40.9%)                        | p<0.001        |
| I find waiting difficult                                              | 221 (44%)             | 15 (10%)                  | 34% (CI 27.3%,40.8%)                        | p<0.001        |
| I have difficulty making decisions about my health                    | 222 (44%)             | 20 (13%)                  | 31% (CI 23.9%,38.2%)                        | p<0.001        |
| I have turned up for a medical appointment on the wrong day           | 151 (30%)             | 16 (10%)                  | 20% (CI 13.0%,26.2%)                        | p<0.001        |
| It is difficult to arrange someone to come with me                    | 103 (20%)             | 2 (1%)                    | 19% (CI 14.7%,23.4%)                        | p<0.001        |
| I have forgotten why I made the appointment                           | 54 (11%)              | 1 (1%)                    | 10% (CI 6.6%,13.4%)                         | p<0.001        |
| None of the above                                                     | 13 (3%)               | 64 (41%)                  | -38% (CI -46.4%,-30.0%)                     | p<0.001        |

**Table S4 Support Needs**

| <b><u>Do you visit your doctor:</u></b>                                 | <b>Autistic n (%)</b> | <b>Non-autistic n (%)</b> | <b>Difference (95% Confidence Interval)</b> | <b>p value</b> |
|-------------------------------------------------------------------------|-----------------------|---------------------------|---------------------------------------------|----------------|
| Alone, by choice                                                        | 306 (60%)             | 134 (85%)                 | -25% (CI -32.4%,-17.6%)                     | p<0.001        |
| Alone, but would prefer to have a support person                        | 165 (33%)             | 10 (6%)                   | 26% (CI 20.2%,32.2%)                        | p<0.001        |
| With a parent, partner or support person                                | 137 (27%)             | 9 (6%)                    | 21% (CI 15.6%,27.0%)                        | p<0.001        |
| With a parent, partner or support person but I would prefer to go alone | 12 (2%)               | 0 (0%)                    | 2% (CI 0.6%,4.1%)                           | p=0.109 ns     |
| With a support animal                                                   | 5 (1%)                | 0 (0%)                    | 1% (CI -0.3%,2.3%)                          | p=0.471 ns     |
| To support an autistic adult                                            | 26 (5%)               | 0 (0%)                    | 5% (CI 2.8%,7.5%)                           | p=0.008        |
| As a parent to access healthcare for my child                           | 78 (15%)              | 30 (19%)                  | -4% (CI -11.0%,3.6%)                        | p=0.327 ns     |
| With my child, but I would prefer to go alone                           | 6 (1%)                | 12 (8%)                   | -7% (CI -11.1%,-1.8%)                       | p<0.001        |

  

| <b><u>If you were suddenly admitted to hospital, who would be able to bring your personal belongings to you?</u></b> | <b>Autistic n (%)</b> | <b>Non-autistic n (%)</b> | <b>Difference (95% Confidence Interval)</b> | <b>p value</b> |
|----------------------------------------------------------------------------------------------------------------------|-----------------------|---------------------------|---------------------------------------------|----------------|
| Spouse or partner                                                                                                    | 234 (46%)             | 106 (68%)                 | -21% (CI -30.3%,-12.4%)                     | p<0.001        |
| Parent                                                                                                               | 168 (33%)             | 70 (45%)                  | -11% (CI -20.7%,-2.2%)                      | p=0.012        |
| Other family member                                                                                                  | 96 (19%)              | 72 (46%)                  | -27% (CI -35.8%,-18.0%)                     | p<0.001        |
| Friend                                                                                                               | 118 (23%)             | 57 (36%)                  | -13% (CI -21.8%,-4.2%)                      | p=0.002        |
| Neighbour                                                                                                            | 17 (3%)               | 14 (9%)                   | -6% (CI -10.7%,-0.4%)                       | p=0.008        |
| Paid support person or carer                                                                                         | 15 (3%)               | 1 (1%)                    | 2% (CI -0.0%,4.7%)                          | p=0.174 ns     |
| Volunteer support person or carer                                                                                    | 6 (1%)                | 0 (0%)                    | 1% (CI -0.2%,2.5%)                          | p=0.375 ns     |
| Nobody available                                                                                                     | 88 (17%)              | 5 (3%)                    | 14% (CI 9.5%,18.9%)                         | p<0.001        |

  

| <b><u>If you were admitted to hospital for a day case surgical procedure, who would be available to collect you afterwards?</u></b> | <b>Autistic n (%)</b> | <b>Non-autistic n (%)</b> | <b>Difference (95% Confidence Interval)</b> | <b>p value</b> |
|-------------------------------------------------------------------------------------------------------------------------------------|-----------------------|---------------------------|---------------------------------------------|----------------|
| Spouse or partner                                                                                                                   | 208 (41%)             | 100 (64%)                 | -23% (CI -31.7%,-13.6%)                     | p<0.001        |

|                                   |           |          |                         |            |
|-----------------------------------|-----------|----------|-------------------------|------------|
| Parent                            | 176 (35%) | 73 (47%) | -12% (CI -21.0%,-2.5%)  | p=0.010    |
| Other family member               | 96 (19%)  | 75 (48%) | -29% (CI -37.8%,-19.9%) | p<0.001    |
| Friend                            | 116 (23%) | 67 (43%) | -29% (CI -37.8%,-19.9%) | p<0.001    |
| Neighbour                         | 17 (3%)   | 8 (5%)   | -2% (CI -5.9%,2.5%)     | p=0.446 ns |
| Paid support person or carer      | 17 (3%)   | 0 (0%)   | 3% (CI 1.4%,5.3%)       | p=0.042    |
| Volunteer support person or carer | 3 (1%)    | 0 (0%)   | 1% (CI -0.5%,1.7%)      | p=0.776 ns |
| Nobody available                  | 99 (20%)  | 3 (2%)   | 18% (CI 13.1%,22.1%)    | p<0.001    |

**If you needed assistance at home after an operation, who would be available to provide that care?**

|                                   | Autistic n (%) | Non-autistic n (%) | Difference (95% Confidence Interval) | p value    |
|-----------------------------------|----------------|--------------------|--------------------------------------|------------|
| Spouse or partner                 | 219 (43%)      | 101 (64%)          | -21% (CI -30.2%,-12.1%)              | p<0.001    |
| Parent                            | 152 (30%)      | 74 (47%)           | -17% (CI -26.3%,-8.0%)               | p<0.001    |
| Other family member               | 83 (16%)       | 61 (39%)           | -23% (CI -31.2%,-13.8%)              | p<0.001    |
| Friend                            | 74 (15%)       | 43 (27%)           | -13% (CI -20.8%,-4.8%)               | p<0.001    |
| Neighbour                         | 14 (3%)        | 8 (5%)             | -2% (CI -6.5%,1.8%)                  | p=0.241 ns |
| Paid support person or carer      | 30 (6%)        | 3 (2%)             | 4% (CI 0.6%,7.4%)                    | p=0.071 ns |
| Volunteer support person or carer | 4 (1%)         | 0 (0%)             | 1% (CI -0.4%,2.0%)                   | p=0.599 ns |
| Nobody available                  | 131 (26%)      | 13 (8%)            | 18% (CI 11.4%,23.7%)                 | p<0.001    |

**If you are a parent and you were unable to care for your child due to illness, who would be available to provide that care to your child?**

|                     | Autistic n (%) | Non-autistic n (%) | Difference (95% Confidence Interval) | p value |
|---------------------|----------------|--------------------|--------------------------------------|---------|
| Spouse or partner   | 110 (22%)      | 64 (41%)           | -19% (CI -28.0%,-10.2%)              | p<0.001 |
| Parent              | 37 (7%)        | 40 (26%)           | -18% (CI -25.8%,-10.6%)              | p<0.001 |
| Other family member | 40 (8%)        | 40 (26%)           | -18% (CI -25.2%,-10.0%)              | p<0.001 |
| Friend              | 21 (4%)        | 27 (17%)           | -13% (CI -19.6%,-6.5%)               | p<0.001 |
| Neighbour           | 4 (1%)         | 8 (5%)             | -5% (CI -8.2%,-0.4%)                 | p<0.001 |

|                                     |           |          |                      |            |
|-------------------------------------|-----------|----------|----------------------|------------|
| Paid support person or carer        | 5 (1%)    | 9 (6%)   | -5% (CI -8.9%,-0.6%) | p<0.001    |
| Volunteer support person or carer   | 1 (1%)    | 0 (0%)   | 0% (CI -0.4%,0.8%)   | p=1.000 ns |
| Nobody available                    | 34 (7%)   | 6 (4%)   | 3% (CI -1.2%,7.0%)   | p=0.256 ns |
| I don't have a child requiring care | 274 (54%) | 78 (50%) | 4% (CI -5.0%,13.7%)  | p=0.387 ns |

**Table S5 Facilitators**

| <b>Visits to my doctor would be easier if:</b>                             | <b>Autistic n (%)</b> | <b>Non-autistic n (%)</b> | <b>Difference (95% Confidence Interval)</b> | <b>p value</b> |
|----------------------------------------------------------------------------|-----------------------|---------------------------|---------------------------------------------|----------------|
| I could book an appointment online                                         | 339 (67%)             | 102 (65%)                 | 2% (CI -7.0%,10.8%)                         | p=0.732 ns     |
| I could email in advance with a description of the issue I need to discuss | 316 (62%)             | 35 (22%)                  | 40% (CI 31.9%,48.2%)                        | p<0.001        |
| I could wait in a quiet place or outside until it was my turn              | 284 (56%)             | 13 (8%)                   | 48% (CI 41.2%,54.3%)                        | p<0.001        |
| I could book the first or last appointment of the day                      | 210 (41%)             | 38 (24%)                  | 17% (CI 8.8%,25.6%)                         | p<0.001        |
| I could book an appointment by text                                        | 209 (41%)             | 44 (28%)                  | 13% (CI 4.6%,21.8%)                         | p=0.004        |
| There was a sensory box* available in the waiting room                     | 80 (16%)              | 4 (3%)                    | 13% (CI 8.8%,17.7%)                         | p<0.001        |
| None of the above                                                          | 16 (3%)               | 34 (22%)                  | -19% (CI -25.5%,-11.5%)                     | p<0.001        |

\*A sensory box contains items to manage sensory stress, such as sunglasses, ear defenders or ear plugs, items providing tactile sensory input such as fidget tools and olfactory input such as scented items.
